# Supplementary material for: Quantum mechanics/molecular mechanics studies on mechanistic photophysics of cytosine aza-analogues: 2,4-diamino-1,3,5-triazine and 2-amino-1,3,5-triazine in aqueous solution
Source: Royal Society of Chemistry journal article supplement (doi:10.1039/d2cp05639a), 2023-01-01
Supplement: d2cp05639a1.pdf [file d2cp05639a1.pdf]

# Quantum mechanics/molecular mechanics studies on mechanistic photophysics of cytosine aza-analogues: 2,4-diamino-1,3,5-triazine and 2-amino-1,3,5-triazine in aqueous solution

Xue-Ping Chang<sup>a\*</sup>, Geng Zhao<sup>a</sup>, Teng-Shuo Zhang<sup>b</sup> and Bin-Bin Xie<sup>c</sup>

<sup>a</sup> College of Chemistry and Chemical Engineering, Xinyang Normal University, Xinyang 464000, P. R. China

<sup>b</sup> China College of Chemical Engineering, Zhejiang University of Technology, Hangzhou 310014, P. R. China

<sup>c</sup> Hangzhou Institute of Advanced Studies, Zhejiang Normal University, Hangzhou 311231, P. R. China.

E-mail: [xuepingchang@xynu.edu.cn](mailto:xuepingchang@xynu.edu.cn)

## Contents

1. Active Orbitals
2. The Effective Spin–Orbit Couplings Expression
3. Bond-Length Difference and Dihedral Angles of Minima and Surface Crossings
4. QM(CASSCF)/MM Optimized Crossing Points
5. The Effect of the Solvation Shell
6. Cartesian Coordinates of All Computed Structures

## 1. Active Orbitals

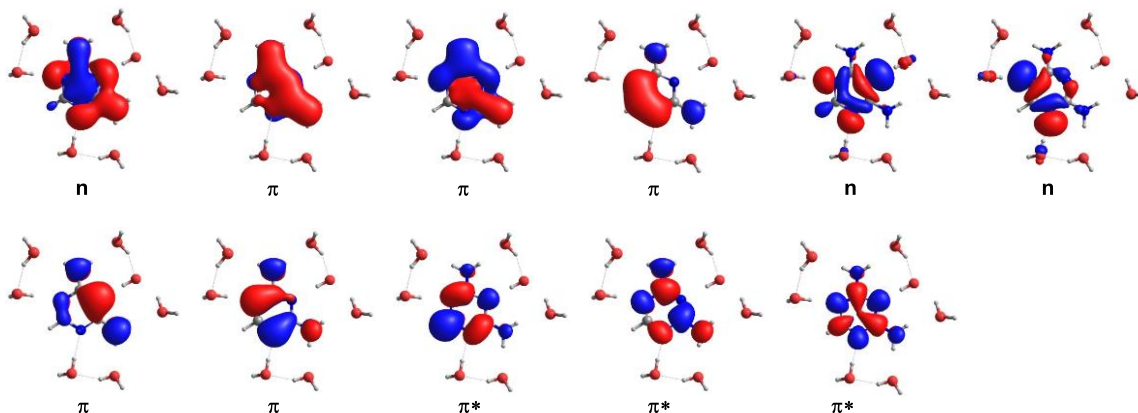

Figure S1. Molecular orbitals included in the active space for 2,4-DT used for QM/MM calculations.

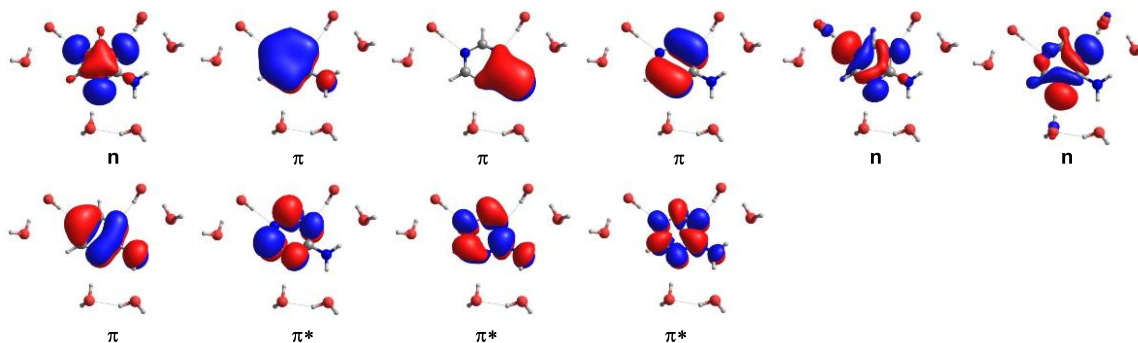

Figure S2. Molecular orbitals included in the active space for 2-AT used for QM/MM calculations.

## 2. The Effective Spin–Orbit Couplings Expression

Spin-orbit couplings are obtained at the QM(MS-CASPT2)/MM level within the atomic mean-field (AMFI) approximation. The effective spin–orbit couplings are expressed as follows:

$$\langle \psi_I | H_{eff}^{so} | \psi_J \rangle = \sqrt{\frac{|\langle \psi_I | H_x^{so} | \psi_J \rangle|^2 + |\langle \psi_I | H_y^{so} | \psi_J \rangle|^2 + |\langle \psi_I | H_z^{so} | \psi_J \rangle|^2}{3}}$$

in which  $\psi_I$  and  $\psi_J$  are the perturbatively modified electronic wave functions of the corresponding singlet and triplet states;  $H_x^{so}$ ,  $H_y^{so}$ ,  $H_z^{so}$  are the x, y, and z components of the spin–orbit operator.

### 3. Bond-Length Difference and Dihedral Angles of Minima and Surface Crossings

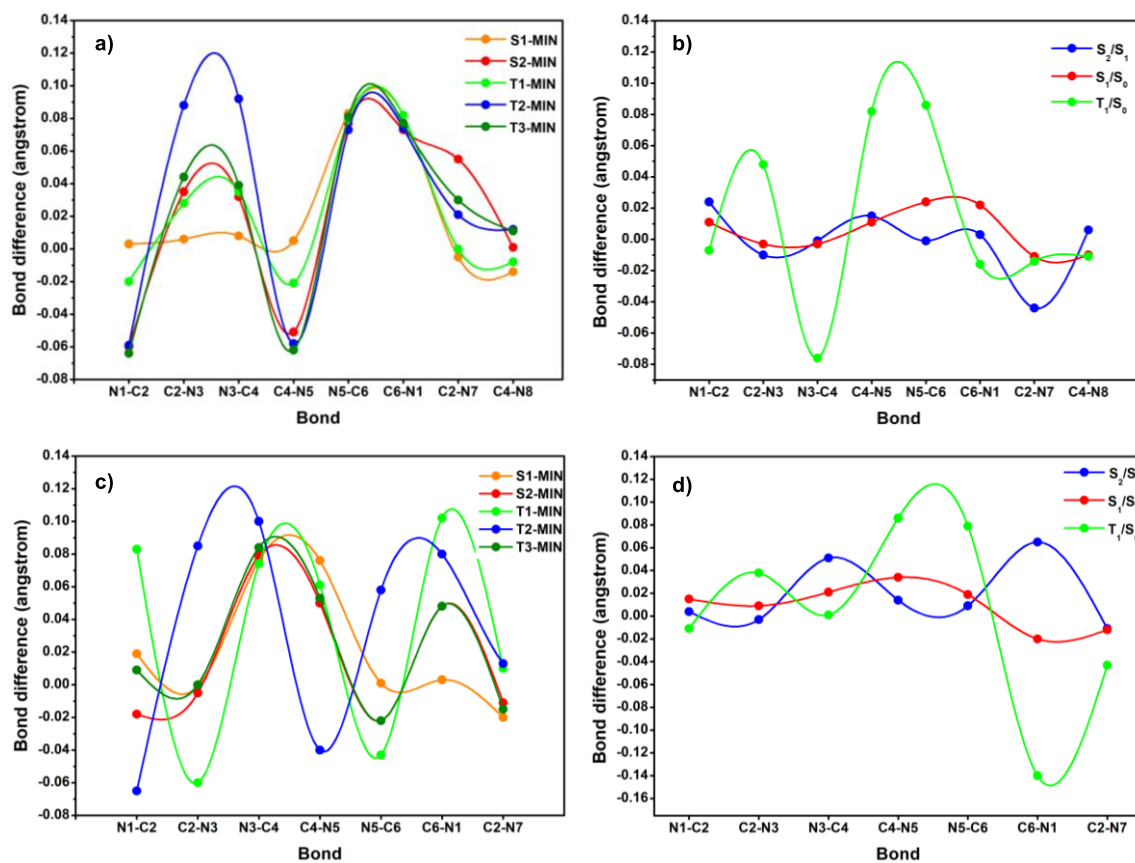

**Figure S3.** QM(CASSCF)/MM computed bond-length difference (in Å) of excited-state minima compared with the counterparts of the  $S_0$  minimum  $S_0$ -MIN (a) for 2,4-DT and (c) for 2-AT. The positive and negative values mean they are longer and shorter than those of  $S_0$ -MIN, respectively. Bond-length difference (in Å) of surface crossings compared with the counterparts of the corresponding excited-state minimum (b) for 2,4-DT and (d) for 2-AT, respectively.

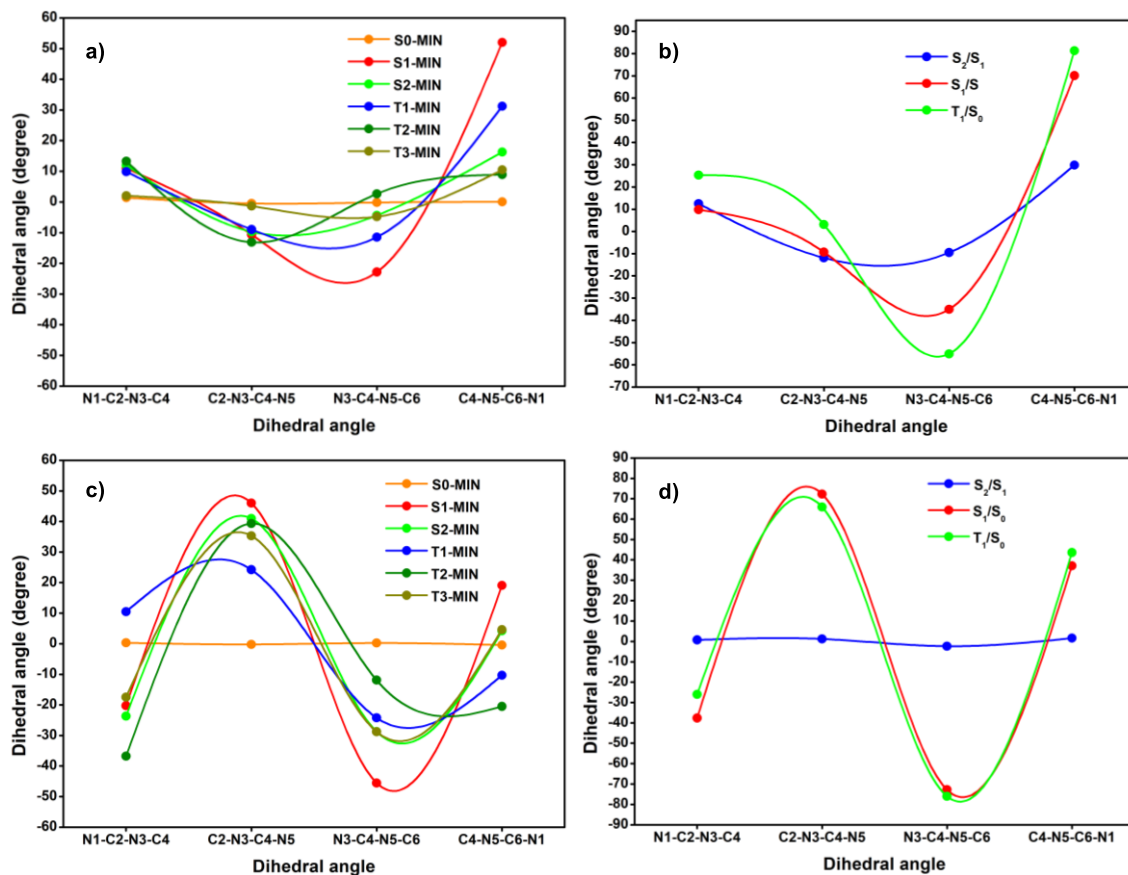

**Figure S4.** QM(CASSCF)/MM computed dihedal angles (in °) of minima and conical intersections and crossing points (a and b) for 2,4-DT and (c and d) for 2-AT.

#### 4. QM(CASSCF)/MM Optimized Crossing Points

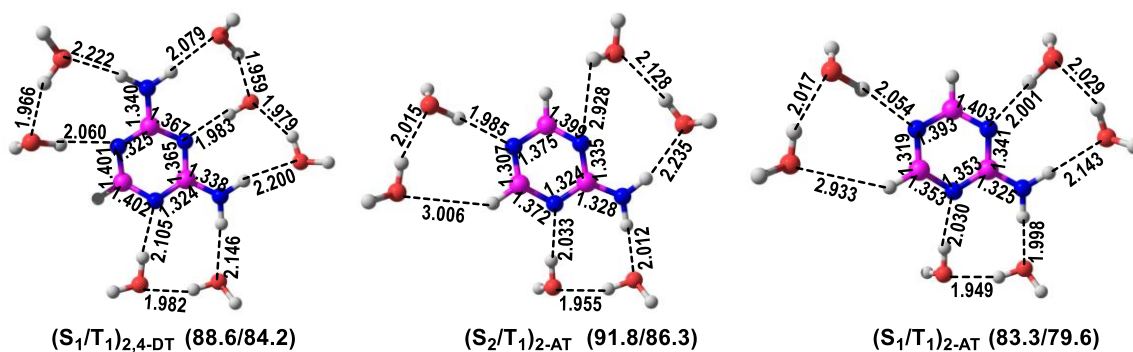

**Figure S5.** QM(CASSCF)/MM optimized crossing points between S<sub>1</sub>, S<sub>2</sub>, and T<sub>1</sub> states together with relative energies in kcal/mol at the QM(MS-CASPT2)/MM level.

## 5. The Effect of the Solvation Shell

In order to roughly estimate the effect of the explicit solvation shell, we do some computational tests in water without including explicit solvation shell of water molecules and in the gas phase. In water, we merely put the 2,4-DT and 2-AT in the QM region (referred to as QM2), respectively, and all solvent water molecules in the MM region. The computed results are given in the following tables S1 and S2. One can see that the QM2(MS-CASPT2)/MM and MS-CASPT2 computations obtain similar numbers and will give virtually the same excited-state relaxation pathways. The  $S_3(\pi\pi^*)$  state is the first spectroscopic bright state at the Franck-Condon region and there are two dark states of  $1n\pi^*$  character below the  $S_3$  state. These surface crossings are all energetically accessible considering the vertical excitation energy at the Franck-Condon region. Therefore,  $1n\pi^*$  state will participate in the excited-state decay processes. Differently, extending the QM region to include the explicit solvation shell of 6-7 water molecules significantly stabilizes the first bright  $1\pi\pi^*$  state ( $S_1$ ) and changes the order of  $1n\pi^*$  state at the Franck-Condon region, due to the hydrogen-bonding interactions. In summary, the gas phase 2,4-DT and 2-AT may exhibit much more complex excited-state dynamics compared with that in water and further gas phase experiments are needed.

**Table S1** QM2(MS-CASPT2)/MM and MS-CASPT2 calculated vertical excitation energies (in kcal/mol [eV]) of the low-lying excited singlet and triplet states at the S0-MIN of 2,4-DT and 2-AT in water and in the gas phase.

| <b>2,4-DT</b> | $S_1(n\pi^*)$ | $S_2(n\pi^*)$ | $S_3(\pi\pi^*)$ | $T_1(\pi\pi^*)$ | $T_2(n\pi^*)$ | $T_3(n\pi^*)$   |
|---------------|---------------|---------------|-----------------|-----------------|---------------|-----------------|
| <b>Water</b>  | 110.2 [4.78]  | 112.8 [4.89]  | 113.9 [4.94]    | 104.5 [4.53]    | 108.0 [4.69]  | 108.6 [4.71]    |
| <b>Gas</b>    | 109.9 [4.77]  | 112.6 [4.88]  | 113.8 [4.93]    | 104.0 [4.51]    | 107.9 [4.68]  | 108.5 [4.71]    |
| <b>2-AT</b>   | $S_1(n\pi^*)$ | $S_2(n\pi^*)$ | $S_3(\pi\pi^*)$ | $T_1(n\pi^*)$   | $T_2(n\pi^*)$ | $T_3(\pi\pi^*)$ |
| <b>Water</b>  | 102.3 [4.44]  | 102.7 [4.45]  | 113.5 [4.92]    | 94.4 [4.09]     | 99.7 [4.32]   | 107.4 [4.66]    |
| <b>Gas</b>    | 102.2 [4.43]  | 102.4 [4.44]  | 113.5 [4.92]    | 94.4 [4.09]     | 99.6 [4.32]   | 107.1 [4.65]    |

**Table S2** QM2(MS-CASPT2)/MM and MS-CASPT2 calculated adiabatic excitation energies (in kcal/mol) of the optimized minima and surface crossings of 2,4-DT and 2-AT in water and in the gas phase.

| <b>2,4-DT</b> | S0-MIN | S1-MIN | S2-MIN | T1-MIN | T2-MIN | $S_2/S_1$  | $S_1/S_0$   | $T_1/S_0$  |
|---------------|--------|--------|--------|--------|--------|------------|-------------|------------|
| <b>Water</b>  | 0.0    | 86.7   | 102.5  | 83.4   | 90.2   | 104.9/95.9 | 104.5/99.5  | 94.3/91.7  |
| <b>Gas</b>    | 0.0    | 86.6   | 102.8  | 84.2   | 89.4   | 103.9/95.2 | 100.7/97.2  | 95.6/93.0  |
| <b>2-AT</b>   | S0-MIN | S1-MIN | S2-MIN | T1-MIN | T2-MIN | $S_2/S_1$  | $S_1/S_0$   | $T_1/S_0$  |
| <b>Water</b>  | 0.0    | 85.3   | 94.5   | 82.3   | 83.3   | 98.2/89.7  | 108.1/101.6 | 100.2/95.7 |
| <b>Gas</b>    | 0.0    | 84.3   | 91.9   | 83.8   | 83.8   | 96.9/88.9  | 107.7/100.1 | 97.1/95.9  |

## 6. Cartesian Coordinates of All Computed Structures

In xyz format (unit: Ångstrom)

### CASSCF/ANO-L-VDZP

For 2,4-DT

S0-MIN

|   |              |              |              |
|---|--------------|--------------|--------------|
| C | -0.724575054 | -0.309980020 | -0.139502008 |
| N | 0.596051045  | -0.422714031 | 0.010687999  |
| C | 1.291079095  | 0.718973051  | 0.047564002  |
| C | -0.585017043 | 1.924243140  | -0.179204013 |
| N | -1.364910096 | 0.864947061  | -0.241782016 |
| N | 0.723508053  | 1.932063141  | -0.030508000 |
| N | -1.479571105 | -1.423341101 | -0.151859011 |
| H | -1.025196072 | -2.298364163 | -0.328535022 |
| H | -2.398063173 | -1.320673095 | -0.540962037 |
| H | -1.068956077 | 2.887504206  | -0.270127020 |
| N | 2.619836188  | 0.670232048  | 0.167373012  |
| H | 3.142204227  | 1.522697109  | 0.228523015  |
| H | 3.112959226  | -0.196570012 | 0.195986012  |
| O | 4.196028301  | 3.388554245  | 0.450144034  |
| H | 3.509951252  | 4.037529291  | 0.319436021  |
| H | 4.934617355  | 3.657894262  | -0.078955008 |
| O | -0.154320013 | -4.218779304 | -0.696605052 |
| H | 0.730803052  | -4.073099294 | -0.379006028 |
| H | -0.091825006 | -4.624088335 | -1.550617109 |
| O | -4.089339294 | -0.773988054 | -1.965449140 |
| H | -4.234864308 | 0.167451012  | -1.951386139 |
| H | -4.873874353 | -1.176264085 | -2.312571165 |
| O | 1.704712122  | 4.665816337  | -0.139021012 |
| H | 1.354118097  | 3.778486274  | -0.097140009 |
| H | 1.048312074  | 5.256706380  | 0.199363015  |
| O | 2.076288152  | -2.969283216 | 0.563773042  |
| H | 2.057823147  | -3.110214224 | 1.502694109  |
| H | 1.587190115  | -2.162249154 | 0.401539030  |
| O | -3.845299278 | 2.013992146  | -1.364224097 |
| H | -4.393147319 | 2.444727176  | -0.722446052 |
| H | -3.116447223 | 1.616960114  | -0.894529064 |
| O | 4.683892339  | -1.866649134 | 0.208595015  |
| H | 5.408847389  | -2.179117155 | -0.315210022 |
| H | 3.988624285  | -2.514204180 | 0.170493014  |

S1-MIN

|   |              |              |              |
|---|--------------|--------------|--------------|
| C | -0.650393045 | -0.411435031 | -0.113881008 |
| N | 0.667911050  | -0.576125040 | 0.077044006  |

|   |              |              |              |
|---|--------------|--------------|--------------|
| C | 1.328062097  | 0.592721044  | 0.059158005  |
| C | -0.580228042 | 1.789910130  | 0.608397046  |
| N | -1.260884088 | 0.788815055  | -0.094298005 |
| N | 0.717123053  | 1.790534131  | 0.085353004  |
| N | -1.417312100 | -1.475636106 | -0.340000023 |
| H | -0.989652072 | -2.362711169 | -0.527389037 |
| H | -2.358813170 | -1.326130098 | -0.649611048 |
| H | -1.071411079 | 2.748052200  | 0.677246049  |
| N | 2.654982193  | 0.593229043  | -0.026485004 |
| H | 3.156471227  | 1.454190103  | 0.090558007  |
| H | 3.170841226  | -0.263230020 | -0.032347002 |
| O | 4.079873292  | 3.338533241  | 0.435365029  |
| H | 3.393767244  | 3.992053285  | 0.334504025  |
| H | 4.841813350  | 3.666051265  | -0.023349004 |
| O | -0.136873008 | -4.235285305 | -0.766947054 |
| H | 0.728066052  | -4.091696297 | -0.394011028 |
| H | -0.019987004 | -4.627597336 | -1.621099116 |
| O | -4.051770292 | -0.709232052 | -1.926949141 |
| H | -4.147753297 | 0.238829017  | -1.907439138 |
| H | -4.839022348 | -1.067751077 | -2.313688168 |
| O | 1.566507112  | 4.616540331  | -0.112995006 |
| H | 1.201576088  | 3.744312272  | -0.226090017 |
| H | 0.872186063  | 5.247531378  | -0.237589017 |
| O | 2.080192152  | -3.070618219 | 0.576768043  |
| H | 2.054780150  | -3.232068235 | 1.511974110  |
| H | 1.605238113  | -2.246189160 | 0.431254031  |
| O | -3.668946266 | 2.075065149  | -1.389238099 |
| H | -4.145475300 | 2.530207183  | -0.708835052 |
| H | -2.879247210 | 1.721269126  | -0.990870074 |
| O | 4.614780335  | -1.885520134 | 0.110130009  |
| H | 5.375323386  | -2.264812161 | -0.308118020 |
| H | 3.940678286  | -2.555113185 | 0.171456011  |

S2-MIN

|   |              |              |              |
|---|--------------|--------------|--------------|
| C | -1.204743086 | -0.249190016 | -0.254896018 |
| N | 0.139771010  | -0.346801025 | -0.036072002 |
| C | 1.031268074  | 0.696066048  | -0.030865004 |
| C | -0.828919060 | 2.018206144  | 0.004340000  |
| N | -1.679436119 | 0.950902068  | -0.279431020 |
| N | 0.555205038  | 1.886513136  | -0.013285000 |
| N | -1.927218137 | -1.379876101 | -0.361927028 |
| H | -1.410365104 | -2.207396160 | -0.593549042 |
| H | -2.823560205 | -1.274758094 | -0.801840060 |
| H | -1.207780088 | 2.995694214  | -0.241110020 |
| N | 2.377687171  | 0.360387027  | 0.048365001  |
| H | 2.944723210  | 1.184303086  | 0.180074012  |
| H | 2.684253194  | -0.116943007 | -0.785702059 |

|   |              |              |              |
|---|--------------|--------------|--------------|
| O | 4.000766289  | 3.098498224  | 0.362273025  |
| H | 3.351454242  | 3.790797271  | 0.269778017  |
| H | 4.799267346  | 3.410017245  | -0.042049001 |
| O | 0.232528019  | -3.703614266 | -0.459321031 |
| H | 1.029473073  | -3.406716243 | -0.031672004 |
| H | 0.476727036  | -4.410813319 | -1.041736073 |
| O | -4.500601326 | -0.689627051 | -1.976718145 |
| H | -4.615934333 | 0.255714020  | -1.926180140 |
| H | -5.273462380 | -1.049606076 | -2.388797173 |
| O | 1.573898114  | 4.619031332  | -0.016113003 |
| H | 1.235707089  | 3.728305269  | -0.045202003 |
| H | 1.113620082  | 5.061909366  | 0.682377047  |
| O | 2.518349183  | -2.524522184 | 1.067248078  |
| H | 2.294854167  | -2.735370197 | 1.965744141  |
| H | 2.480204177  | -1.574843114 | 0.987861072  |
| O | -4.197167303 | 2.081850149  | -1.386915101 |
| H | -4.693914337 | 2.525527182  | -0.712764051 |
| H | -3.406090247 | 1.746184124  | -0.974364072 |
| O | 5.460831392  | -2.260900165 | 0.505933038  |
| H | 5.829784422  | -1.846694135 | 1.273356092  |
| H | 4.576827330  | -2.521003182 | 0.734185050  |

T1-MIN

|   |              |              |              |
|---|--------------|--------------|--------------|
| C | -0.731234051 | -0.314892023 | -0.147504009 |
| N | 0.612614044  | -0.457730033 | 0.071083004  |
| C | 1.304521092  | 0.719073050  | 0.055041006  |
| C | -0.640272049 | 1.956903140  | 0.246679017  |
| N | -1.362549097 | 0.844774062  | -0.189412011 |
| N | 0.742697052  | 1.915476139  | 0.037107004  |
| N | -1.439955103 | -1.436603104 | -0.312212021 |
| H | -0.967002069 | -2.305846168 | -0.468877036 |
| H | -2.377382169 | -1.345109098 | -0.658476048 |
| H | -1.102198082 | 2.909950211  | 0.040022003  |
| N | 2.637389188  | 0.644079045  | 0.049031003  |
| H | 3.175752229  | 1.486971110  | 0.132770011  |
| H | 3.115468224  | -0.232716014 | 0.071452005  |
| O | 4.159411300  | 3.357752239  | 0.421177030  |
| H | 3.469404252  | 4.006867290  | 0.310315021  |
| H | 4.911038355  | 3.669411265  | -0.064659004 |
| O | -0.129604007 | -4.195390304 | -0.731691054 |
| H | 0.743669055  | -4.097722292 | -0.366190027 |
| H | -0.047989005 | -4.634456335 | -1.567161111 |
| O | -4.068419293 | -0.830050060 | -1.948275143 |
| H | -4.213296302 | 0.112064009  | -1.919583136 |
| H | -4.860729352 | -1.228902086 | -2.281075164 |
| O | 1.684555120  | 4.668113337  | -0.157044012 |
| H | 1.332056094  | 3.780991272  | -0.148714010 |



|   |              |              |              |
|---|--------------|--------------|--------------|
| H | 1.021807072  | 5.244844380  | 0.193636015  |
| O | 2.080368151  | -3.032182218 | 0.634617044  |
| H | 2.068977150  | -3.183119228 | 1.572156116  |
| H | 1.600853117  | -2.217422158 | 0.486030036  |
| O | -3.835279275 | 1.950913139  | -1.418342102 |
| H | -4.334950310 | 2.437948178  | -0.777909056 |
| H | -3.056635218 | 1.621561114  | -0.976900070 |
| O | 4.625461333  | -1.854401136 | 0.159633011  |
| H | 5.376740385  | -2.179487156 | -0.317226023 |
| H | 3.971890287  | -2.544037183 | 0.194507014  |

T2-MIN

|   |              |              |              |
|---|--------------|--------------|--------------|
| C | -0.868949065 | -0.261278018 | -0.141704010 |
| N | 0.514247037  | -0.408529027 | 0.174276012  |
| C | 1.265283091  | 0.800217057  | 0.099495007  |
| C | -0.670492049 | 2.015187145  | -0.054538002 |
| N | -1.452087105 | 0.879303063  | -0.227598018 |
| N | 0.717480052  | 1.958260141  | 0.021912002  |
| N | -1.536022110 | -1.440960106 | -0.211059017 |
| H | -1.000302071 | -2.257212165 | -0.436483032 |
| H | -2.432726177 | -1.389804102 | -0.661039049 |
| H | -1.087477080 | 2.939298212  | -0.416218031 |
| N | 2.596837187  | 0.623543047  | 0.283345021  |
| H | 3.172867228  | 1.439626103  | 0.183465011  |
| H | 3.017307215  | -0.237803016 | -0.001947002 |
| O | 4.230303302  | 3.364632242  | 0.392339029  |
| H | 3.521313254  | 3.991483287  | 0.273060022  |
| H | 4.968639357  | 3.688911267  | -0.105127008 |
| O | -0.044006004 | -4.140519296 | -0.715727052 |
| H | 0.796495058  | -4.096938295 | -0.273480019 |
| H | 0.082355003  | -4.605224330 | -1.531784109 |
| O | -4.121479298 | -0.837515063 | -1.991005142 |
| H | -4.277163308 | 0.101922009  | -1.945026143 |
| H | -4.916545354 | -1.239890087 | -2.312651166 |
| O | 1.728910122  | 4.661428336  | -0.138212011 |
| H | 1.374038096  | 3.776353272  | -0.078655007 |
| H | 1.159146084  | 5.229268375  | 0.359270023  |
| O | 2.059009149  | -3.055219220 | 0.928441065  |
| H | 2.017832148  | -3.265798236 | 1.853581134  |
| H | 1.566024110  | -2.248152164 | 0.813034059  |
| O | -3.930782285 | 1.944018139  | -1.400216103 |
| H | -4.459264322 | 2.424842177  | -0.778111054 |
| H | -3.179164231 | 1.598293117  | -0.924522069 |
| O | 4.474257321  | -1.945389142 | -0.136613012 |
| H | 5.295109381  | -2.001496144 | 0.334273024  |
| H | 3.863627279  | -2.543354184 | 0.279759020  |

## T3-MIN

|   |              |              |              |
|---|--------------|--------------|--------------|
| C | -0.953302066 | -0.238963015 | -0.184192011 |
| N | 0.404475027  | -0.284602018 | 0.013516002  |
| C | 1.236324088  | 0.816575059  | 0.067104004  |
| C | -0.678208051 | 2.059382150  | -0.125812007 |
| N | -1.474750105 | 0.924013069  | -0.301661020 |
| N | 0.709961052  | 1.975980143  | -0.037037005 |
| N | -1.640530119 | -1.407757101 | -0.182961012 |
| H | -1.119168082 | -2.221520160 | -0.451481032 |
| H | -2.546453184 | -1.340411094 | -0.612501044 |
| H | -1.070910075 | 2.975162216  | -0.534582038 |
| N | 2.555289184  | 0.576795041  | 0.323160021  |
| H | 3.128087223  | 1.402856100  | 0.299416023  |
| H | 2.972010214  | -0.204643013 | -0.146837008 |
| O | 4.224422302  | 3.328565241  | 0.421003032  |
| H | 3.520810255  | 3.962499286  | 0.306014022  |
| H | 4.943824357  | 3.621054259  | -0.121776010 |
| O | 0.001520998  | -4.035944288 | -0.672572049 |
| H | 0.856818062  | -3.987667289 | -0.258987019 |
| H | 0.098905006  | -4.527650327 | -1.477457106 |
| O | -4.208072302 | -0.818861057 | -1.975136143 |
| H | -4.359487312 | 0.121613007  | -1.933794138 |
| H | -4.999807362 | -1.217397085 | -2.309694165 |
| O | 1.746692124  | 4.673493339  | -0.115614010 |
| H | 1.389568099  | 3.787703272  | -0.094012005 |
| H | 1.167310083  | 5.220261376  | 0.394466031  |
| O | 2.275119163  | -3.262179235 | 1.020082071  |
| H | 2.194939158  | -3.677859262 | 1.870364133  |
| H | 1.988117141  | -2.363441169 | 1.139128082  |
| O | -4.006973289 | 1.967753141  | -1.425212103 |
| H | -4.496811322 | 2.455293179  | -0.776925056 |
| H | -3.216468232 | 1.652142119  | -0.996120073 |
| O | 4.571109331  | -1.956517142 | -0.119876009 |
| H | 5.408831387  | -1.895274136 | 0.319487023  |
| H | 4.087771294  | -2.662775191 | 0.290675020  |

S<sub>2</sub>/S<sub>1</sub>

|   |              |              |              |
|---|--------------|--------------|--------------|
| C | -0.789025059 | -0.317905021 | -0.091649007 |
| N | 0.565889042  | -0.377103027 | 0.059545003  |
| C | 1.326984095  | 0.748753051  | -0.026921004 |
| C | -0.628180047 | 1.954016139  | 0.272806022  |
| N | -1.386742102 | 0.843181059  | -0.088530004 |
| N | 0.735123054  | 1.912549138  | -0.009664999 |
| N | -1.483971108 | -1.473381108 | -0.186063012 |
| H | -0.987491071 | -2.281777166 | -0.508796035 |
| H | -2.411234172 | -1.372601100 | -0.556827041 |
| H | -1.103532080 | 2.909633208  | 0.115709008  |

|   |              |              |              |
|---|--------------|--------------|--------------|
| N | 2.660115192  | 0.639204047  | -0.174864013 |
| H | 3.205586231  | 1.458371106  | 0.021879003  |
| H | 3.108771222  | -0.240794016 | -0.027614003 |
| O | 4.178547301  | 3.373412245  | 0.440430033  |
| H | 3.481881251  | 4.016615290  | 0.343749027  |
| H | 4.916946354  | 3.695589266  | -0.058583007 |
| O | -0.083121009 | -4.196887304 | -0.764312053 |
| H | 0.778839059  | -4.210688305 | -0.364352025 |
| H | -0.029965000 | -4.668492339 | -1.584287113 |
| O | -4.093464294 | -0.805948058 | -1.963098144 |
| H | -4.216280301 | 0.138761012  | -1.936255141 |
| H | -4.890783349 | -1.183985088 | -2.308153164 |
| O | 1.692379122  | 4.695200338  | -0.152873010 |
| H | 1.334596098  | 3.813426276  | -0.203608016 |
| H | 0.996177071  | 5.273692382  | 0.123176011  |
| O | 2.162925157  | -3.212838230 | 0.760149053  |
| H | 2.147416157  | -3.390234245 | 1.693580122  |
| H | 1.682602123  | -2.402008173 | 0.639251043  |
| O | -3.826944273 | 1.984076143  | -1.394748099 |
| H | -4.353646312 | 2.441921177  | -0.754117056 |
| H | -3.069218223 | 1.634742115  | -0.934531065 |
| O | 4.635875335  | -1.878839134 | 0.194831014  |
| H | 5.399807391  | -2.152952155 | -0.294349024 |
| H | 4.045411290  | -2.620206189 | 0.261456017  |

S<sub>1</sub>/T<sub>1</sub>

|   |              |              |              |
|---|--------------|--------------|--------------|
| C | -0.709278053 | -0.386595027 | -0.108006008 |
| N | 0.631963045  | -0.532978038 | 0.111984008  |
| C | 1.317614096  | 0.646670045  | 0.065542005  |
| C | -0.610445042 | 1.827791130  | 0.507887035  |
| N | -1.332162094 | 0.782301058  | -0.082974008 |
| N | 0.731505053  | 1.833177133  | 0.103316005  |
| N | -1.426633103 | -1.497544108 | -0.321838025 |
| H | -0.960749067 | -2.358216168 | -0.532224040 |
| H | -2.365179173 | -1.382557099 | -0.654177049 |
| H | -1.103470081 | 2.785469201  | 0.537805040  |
| N | 2.650653190  | 0.587903043  | -0.033996003 |
| H | 3.181993229  | 1.430483105  | 0.089626005  |
| H | 3.136389226  | -0.284936019 | -0.029020001 |
| O | 4.150687299  | 3.313381240  | 0.439376034  |
| H | 3.473211248  | 3.976927288  | 0.346398025  |
| H | 4.917153352  | 3.639178263  | -0.012412001 |
| O | -0.090384009 | -4.230750304 | -0.776189055 |
| H | 0.769362055  | -4.090620295 | -0.392184028 |
| H | 0.034221004  | -4.626295332 | -1.627763119 |
| O | -4.065440295 | -0.777349054 | -1.950972142 |
| H | -4.177487301 | 0.168721011  | -1.928703141 |

S11

|   |              |              |              |
|---|--------------|--------------|--------------|
| H | -4.842481347 | -1.145836081 | -2.348586169 |
| O | 1.654128122  | 4.632869333  | -0.086551008 |
| H | 1.287693091  | 3.756496271  | -0.153099011 |
| H | 0.957521070  | 5.258710379  | -0.220539016 |
| O | 2.087775150  | -3.042088221 | 0.607363045  |
| H | 2.071955148  | -3.215032230 | 1.540814111  |
| H | 1.604146113  | -2.222791159 | 0.475112035  |
| O | -3.736803268 | 2.013858143  | -1.411944100 |
| H | -4.250718304 | 2.478941179  | -0.766522056 |
| H | -2.974694212 | 1.662153121  | -0.960257070 |
| O | 4.632747331  | -1.891164138 | 0.117036010  |
| H | 5.394622391  | -2.271767164 | -0.297527019 |
| H | 3.960383286  | -2.561101186 | 0.184014012  |

S<sub>1</sub>/S<sub>0</sub>

|   |              |              |              |
|---|--------------|--------------|--------------|
| C | -0.615783043 | -0.442862031 | -0.147472010 |
| N | 0.693131051  | -0.632841045 | 0.062245003  |
| C | 1.331031094  | 0.545752038  | 0.067935003  |
| C | -0.542433039 | 1.634818116  | 0.824357060  |
| N | -1.174951085 | 0.794264057  | -0.135785009 |
| N | 0.663439048  | 1.725661122  | 0.077424008  |
| N | -1.405914099 | -1.468414107 | -0.407765028 |
| H | -1.010745072 | -2.378380171 | -0.559002039 |
| H | -2.348434168 | -1.289810091 | -0.700915052 |
| H | -1.038455073 | 2.564064187  | 1.059250078  |
| N | 2.648268188  | 0.589514044  | 0.005805000  |
| H | 3.119696223  | 1.471618106  | 0.093822004  |
| H | 3.193960228  | -0.248964015 | -0.028405002 |
| O | 3.957864286  | 3.359311243  | 0.380991030  |
| H | 3.242652235  | 3.977643286  | 0.256165017  |
| H | 4.716882338  | 3.722351268  | -0.055357004 |
| O | -0.151016011 | -4.234992305 | -0.730240055 |
| H | 0.719874050  | -4.103528293 | -0.366141025 |
| H | -0.050040006 | -4.661589338 | -1.569909113 |
| O | -4.013801290 | -0.612674042 | -1.901106135 |
| H | -4.052288293 | 0.340314026  | -1.881303137 |
| H | -4.818463346 | -0.923795069 | -2.293128166 |
| O | 1.399079102  | 4.541993327  | -0.174201012 |
| H | 1.045676078  | 3.664118265  | -0.292677019 |
| H | 0.728260054  | 5.165940374  | -0.411824029 |
| O | 2.100053153  | -3.109070223 | 0.581794041  |
| H | 2.071832151  | -3.260906236 | 1.518514111  |
| H | 1.625302117  | -2.285357166 | 0.426995033  |
| O | -3.496148251 | 2.167546155  | -1.425514104 |
| H | -3.917898280 | 2.657195191  | -0.733131051 |
| H | -2.682875195 | 1.818687133  | -1.068251076 |
| O | 4.594523329  | -1.848372135 | 0.103080008  |

|   |             |              |              |
|---|-------------|--------------|--------------|
| H | 5.381163386 | -2.212549161 | -0.278971022 |
| H | 3.944761286 | -2.541226183 | 0.173322012  |

T<sub>1</sub>/S<sub>0</sub>

|   |              |              |              |
|---|--------------|--------------|--------------|
| C | -0.583986042 | -0.586611041 | -0.236456017 |
| N | 0.675116047  | -0.669769050 | 0.043966004  |
| C | 1.257893088  | 0.615953047  | 0.105044007  |
| C | -0.698250052 | 1.467863106  | 0.731137053  |
| N | -1.077011076 | 0.704244048  | -0.481340033 |
| N | 0.613009043  | 1.729532123  | 0.376378027  |
| N | -1.441772102 | -1.594841114 | -0.308966021 |
| H | -1.085941080 | -2.533945180 | -0.307946022 |
| H | -2.322106166 | -1.425755102 | -0.761579054 |
| H | -1.347548097 | 2.294313163  | 0.977081070  |
| N | 2.563516187  | 0.633873047  | -0.097116006 |
| H | 3.071164219  | 1.493141110  | 0.011731002  |
| H | 3.078175220  | -0.216028018 | -0.208959014 |
| O | 4.007537286  | 3.315622237  | 0.340353027  |
| H | 3.255239234  | 3.894499279  | 0.236820017  |
| H | 4.738871341  | 3.721378270  | -0.104818006 |
| O | -0.157063009 | -4.336186315 | -0.717192052 |
| H | 0.730230054  | -4.184146304 | -0.405034029 |
| H | -0.097712008 | -4.642859337 | -1.611518113 |
| O | -3.966440286 | -0.691632050 | -1.862146132 |
| H | -4.054438292 | 0.254635017  | -1.784221131 |
| H | -4.780329346 | -1.023570074 | -2.216650157 |
| O | 1.386562097  | 4.487513323  | 0.011574001  |
| H | 1.090586081  | 3.581021260  | 0.117143010  |
| H | 0.993620071  | 4.984803361  | 0.714637052  |
| O | 2.125568153  | -3.178070226 | 0.526254037  |
| H | 2.138005152  | -3.346116240 | 1.460483105  |
| H | 1.667466119  | -2.342475167 | 0.407295028  |
| O | -3.631619262 | 2.120906155  | -1.474178107 |
| H | -3.892265278 | 2.730300198  | -0.797359056 |
| H | -2.687682193 | 2.020712147  | -1.417312100 |
| O | 4.571457329  | -1.828783131 | 0.015413002  |
| H | 5.358238385  | -2.157029154 | -0.397885029 |
| H | 3.951416282  | -2.546802181 | 0.089625004  |

LIIC path connecting Franck-Condon point and S1-MIN

Coord\_1

|   |              |              |              |
|---|--------------|--------------|--------------|
| C | -0.724575054 | -0.309980020 | -0.139502008 |
| N | 0.596051045  | -0.422714031 | 0.010687999  |
| C | 1.291079095  | 0.718973051  | 0.047564002  |
| C | -0.585017043 | 1.924243140  | -0.179204013 |
| N | -1.364910096 | 0.864947061  | -0.241782016 |
| N | 0.723508053  | 1.932063141  | -0.030508000 |

|   |              |              |              |
|---|--------------|--------------|--------------|
| N | -1.479571105 | -1.423341101 | -0.151859011 |
| H | -1.025196072 | -2.298364163 | -0.328535022 |
| H | -2.398063173 | -1.320673095 | -0.540962037 |
| H | -1.068956077 | 2.887504206  | -0.270127020 |
| N | 2.619836188  | 0.670232048  | 0.167373012  |
| H | 3.142204227  | 1.522697109  | 0.228523015  |
| H | 3.112959226  | -0.196570012 | 0.195986012  |
| O | 4.196028301  | 3.388554245  | 0.450144034  |
| H | 3.509951252  | 4.037529291  | 0.319436021  |
| H | 4.934617355  | 3.657894262  | -0.078955008 |
| O | -0.154320013 | -4.218779304 | -0.696605052 |
| H | 0.730803052  | -4.073099294 | -0.379006028 |
| H | -0.091825006 | -4.624088335 | -1.550617109 |
| O | -4.089339294 | -0.773988054 | -1.965449140 |
| H | -4.234864308 | 0.167451012  | -1.951386139 |
| H | -4.873874353 | -1.176264085 | -2.312571165 |
| O | 1.704712122  | 4.665816337  | -0.139021012 |
| H | 1.354118097  | 3.778486274  | -0.097140009 |
| H | 1.048312074  | 5.256706380  | 0.199363015  |
| O | 2.076288152  | -2.969283216 | 0.563773042  |
| H | 2.057823147  | -3.110214224 | 1.502694109  |
| H | 1.587190115  | -2.162249154 | 0.401539030  |
| O | -3.845299278 | 2.013992146  | -1.364224097 |
| H | -4.393147319 | 2.444727176  | -0.722446052 |
| H | -3.116447223 | 1.616960114  | -0.894529064 |
| O | 4.683892339  | -1.866649134 | 0.208595015  |
| H | 5.408847389  | -2.179117155 | -0.315210022 |
| H | 3.988624285  | -2.514204180 | 0.170493014  |

Coord\_2

|   |              |              |              |
|---|--------------|--------------|--------------|
| C | -0.716729054 | -0.317866021 | -0.141009010 |
| N | 0.602991046  | -0.432775029 | 0.016802002  |
| C | 1.293320092  | 0.711654054  | 0.046532005  |
| C | -0.598114042 | 1.934230138  | -0.117022008 |
| N | -1.361513101 | 0.855612062  | -0.237257016 |
| N | 0.725582052  | 1.925276136  | -0.027096002 |
| N | -1.469834107 | -1.430185104 | -0.173259013 |
| H | -1.014987073 | -2.305926164 | -0.345758027 |
| H | -2.390896171 | -1.326484096 | -0.555751038 |
| H | -1.096727077 | 2.890740209  | -0.195039012 |
| N | 2.623209190  | 0.669996046  | 0.149212008  |
| H | 3.140785228  | 1.525226111  | 0.215448013  |
| H | 3.119575227  | -0.195183012 | 0.179292015  |
| O | 4.204975302  | 3.390432242  | 0.455322034  |
| H | 3.518972253  | 4.039024290  | 0.322940021  |
| H | 4.950192354  | 3.668469266  | -0.059844004 |
| O | -0.154883010 | -4.211235305 | -0.702300052 |

|   |              |              |              |
|---|--------------|--------------|--------------|
| H | 0.727552052  | -4.067048295 | -0.376203029 |
| H | -0.084862007 | -4.616228333 | -1.555829114 |
| O | -4.090975293 | -0.780126055 | -1.956203139 |
| H | -4.231243306 | 0.161633010  | -1.953016142 |
| H | -4.875239350 | -1.182228087 | -2.304138164 |
| O | 1.714175124  | 4.664486335  | -0.148612011 |
| H | 1.350826096  | 3.782031270  | -0.122234007 |
| H | 1.050836075  | 5.278324382  | 0.130349009  |
| O | 2.073281150  | -2.973216214 | 0.571686042  |
| H | 2.052087146  | -3.114283222 | 1.510491107  |
| H | 1.587104114  | -2.163788155 | 0.408599027  |
| O | -3.832845277 | 2.012221144  | -1.395260099 |
| H | -4.373722317 | 2.453342177  | -0.755663053 |
| H | -3.097651223 | 1.625282120  | -0.928554066 |
| O | 4.675975339  | -1.866453132 | 0.208035013  |
| H | 5.405280391  | -2.190016158 | -0.302760021 |
| H | 3.981891288  | -2.516036181 | 0.180813013  |

#### Coord\_3

|   |              |              |              |
|---|--------------|--------------|--------------|
| C | -0.708667049 | -0.324333022 | -0.143072012 |
| N | 0.610154042  | -0.442449030 | 0.022801004  |
| C | 1.296369095  | 0.704540049  | 0.045665001  |
| C | -0.607969043 | 1.941685140  | -0.051079003 |
| N | -1.355920099 | 0.848827063  | -0.232663017 |
| N | 0.727934054  | 1.918468139  | -0.023074001 |
| N | -1.460716107 | -1.434645105 | -0.196201017 |
| H | -1.006204075 | -2.311406165 | -0.364991027 |
| H | -2.384063170 | -1.328930096 | -0.572383042 |
| H | -1.118192078 | 2.892700208  | -0.115393010 |
| N | 2.627105189  | 0.669152050  | 0.131127011  |
| H | 3.140589226  | 1.526627108  | 0.202798015  |
| H | 3.126306224  | -0.194633011 | 0.162315014  |
| O | 4.210081302  | 3.391600242  | 0.458736031  |
| H | 3.524386255  | 4.040177294  | 0.325250022  |
| H | 4.961227356  | 3.677487266  | -0.043395006 |
| O | -0.155331012 | -4.203793300 | -0.708230049 |
| H | 0.724265051  | -4.060962291 | -0.373549025 |
| H | -0.077586005 | -4.608574334 | -1.561150113 |
| O | -4.092609297 | -0.786264056 | -1.946957142 |
| H | -4.227620305 | 0.155816013  | -1.954645140 |
| H | -4.876603352 | -1.188192084 | -2.295704164 |
| O | 1.719926121  | 4.663783333  | -0.157423014 |
| H | 1.346505099  | 3.785537270  | -0.147186011 |
| H | 1.051507077  | 5.296028382  | 0.062217004  |
| O | 2.069928150  | -2.977046214 | 0.579679042  |
| H | 2.045704146  | -3.118368227 | 1.518336112  |
| H | 1.586744114  | -2.165237153 | 0.415685028  |

|   |              |              |              |
|---|--------------|--------------|--------------|
| O | -3.820390275 | 2.010450146  | -1.426294101 |
| H | -4.354294316 | 2.461956177  | -0.788879059 |
| H | -3.078854223 | 1.633603120  | -0.962580068 |
| O | 4.667711337  | -1.866079136 | 0.208207016  |
| H | 5.401490386  | -2.200262157 | -0.289088023 |
| H | 3.974826285  | -2.517510183 | 0.191625015  |

Coord\_4

|   |              |              |              |
|---|--------------|--------------|--------------|
| C | -0.700330052 | -0.329278024 | -0.145783009 |
| N | 0.617571043  | -0.451718035 | 0.028587002  |
| C | 1.300283091  | 0.697646049  | 0.044850005  |
| C | -0.614327044 | 1.946365141  | 0.018474001  |
| N | -1.347958098 | 0.844760060  | -0.228046014 |
| N | 0.730554053  | 1.911621135  | -0.018493004 |
| N | -1.452215102 | -1.436519102 | -0.220808018 |
| H | -0.998923072 | -2.314642168 | -0.386378028 |
| H | -2.377556173 | -1.327732097 | -0.590986041 |
| H | -1.133024080 | 2.893275207  | -0.031470002 |
| N | 2.631589188  | 0.667672047  | 0.112943009  |
| H | 3.141735228  | 1.526855109  | 0.190371013  |
| H | 3.133183226  | -0.194978014 | 0.144857012  |
| O | 4.211176302  | 3.392049244  | 0.460429033  |
| H | 3.526063255  | 4.041003292  | 0.326317024  |
| H | 4.967646355  | 3.684833263  | -0.029627004 |
| O | -0.155684010 | -4.196521304 | -0.714314053 |
| H | 0.720916053  | -4.054890294 | -0.370968026 |
| H | -0.070016003 | -4.601230333 | -1.566474112 |
| O | -4.094244296 | -0.792402057 | -1.937711140 |
| H | -4.223997303 | 0.149998011  | -1.956275138 |
| H | -4.877966354 | -1.194156086 | -2.287271163 |
| O | 1.721836123  | 4.663764336  | -0.165603014 |
| H | 1.340998095  | 3.789004275  | -0.171984014 |
| H | 1.049860076  | 5.309875384  | -0.004745000 |
| O | 2.066193148  | -2.980765214 | 0.587785042  |
| H | 2.038613145  | -3.122429223 | 1.526264108  |
| H | 1.586083114  | -2.166593154 | 0.422799033  |
| O | -3.807934274 | 2.008678143  | -1.457329103 |
| H | -4.334867314 | 2.470571177  | -0.822096060 |
| H | -3.060057223 | 1.641925120  | -0.996605069 |
| O | 4.659061337  | -1.865505132 | 0.209124017  |
| H | 5.397432391  | -2.209852161 | -0.274173019 |
| H | 3.967386285  | -2.518613179 | 0.202957017  |

Coord\_5

|   |              |              |              |
|---|--------------|--------------|--------------|
| C | -0.691653048 | -0.332593023 | -0.149243013 |
| N | 0.625273043  | -0.460565032 | 0.034056001  |
| C | 1.305118094  | 0.690990047  | 0.043958003  |



|   |              |              |              |
|---|--------------|--------------|--------------|
| C | -0.616919044 | 1.947973141  | 0.091474008  |
| N | -1.337420094 | 0.843589060  | -0.223459016 |
| N | 0.733421051  | 1.904711139  | -0.013407002 |
| N | -1.444330102 | -1.435583104 | -0.247214016 |
| H | -0.993229072 | -2.315450169 | -0.410073029 |
| H | -2.371356169 | -1.322576096 | -0.611700044 |
| H | -1.140787084 | 2.892327207  | 0.056397002  |
| N | 2.636724192  | 0.665528049  | 0.094459007  |
| H | 3.144336224  | 1.525856112  | 0.177930013  |
| H | 3.140229227  | -0.196275017 | 0.126688007  |
| O | 4.208072302  | 3.391769245  | 0.460466033  |
| H | 3.523852252  | 4.041514292  | 0.326107025  |
| H | 4.969339358  | 3.690395265  | -0.018543001 |
| O | -0.155970009 | -4.189497302 | -0.720458050 |
| H | 0.717472051  | -4.048880291 | -0.368373026 |
| H | -0.062174003 | -4.594316331 | -1.571680116 |
| O | -4.095878295 | -0.798540058 | -1.928464138 |
| H | -4.220374302 | 0.144180009  | -1.957904142 |
| H | -4.879330350 | -1.200120088 | -2.278837163 |
| O | 1.719757123  | 4.664464337  | -0.173293013 |
| H | 1.334117097  | 3.792433275  | -0.196612013 |
| H | 1.045394074  | 5.319931382  | -0.070255006 |
| O | 2.062027148  | -2.984361216 | 0.596044044  |
| H | 2.030745147  | -3.126422225 | 1.534316111  |
| H | 1.585082117  | -2.167852157 | 0.429938031  |
| O | -3.795479272 | 2.006906146  | -1.488364105 |
| H | -4.315440312 | 2.479185177  | -0.855312061 |
| H | -3.041260217 | 1.650246120  | -1.030630076 |
| O | 4.649979337  | -1.864708133 | 0.210796016  |
| H | 5.393048390  | -2.218780159 | -0.257989017 |
| H | 3.959516287  | -2.519322182 | 0.214841015  |

Coord\_6

|   |              |              |              |
|---|--------------|--------------|--------------|
| C | -0.682564048 | -0.334155022 | -0.153566010 |
| N | 0.633294048  | -0.468969033 | 0.039088000  |
| C | 1.310932095  | 0.684588050  | 0.042842005  |
| C | -0.615462044 | 1.946146141  | 0.167731011  |
| N | -1.324058094 | 0.845498061  | -0.218968016 |
| N | 0.736504053  | 1.897706139  | -0.007881000 |
| N | -1.437059101 | -1.431583101 | -0.275566020 |
| H | -0.989219073 | -2.313616168 | -0.436244030 |
| H | -2.365439168 | -1.313109094 | -0.634679047 |
| H | -1.140896084 | 2.889699207  | 0.147800010  |
| N | 2.642570193  | 0.662695046  | 0.075436005  |
| H | 3.148509226  | 1.523581110  | 0.165197014  |
| H | 3.147464228  | -0.198579012 | 0.107534008  |
| O | 4.200551301  | 3.390751246  | 0.458931033  |

|   |              |              |              |
|---|--------------|--------------|--------------|
| H | 3.517570251  | 4.041716289  | 0.324596023  |
| H | 4.966167358  | 3.694066268  | -0.010124002 |
| O | -0.156223009 | -4.182812301 | -0.726551055 |
| H | 0.713893050  | -4.042991289 | -0.365661024 |
| H | -0.054092006 | -4.587972332 | -1.576628113 |
| O | -4.097512294 | -0.804678059 | -1.919218136 |
| H | -4.216751306 | 0.138363012  | -1.959534140 |
| H | -4.880693352 | -1.206083085 | -2.270403162 |
| O | 1.713519124  | 4.665895338  | -0.180626012 |
| H | 1.325637095  | 3.795821274  | -0.221054017 |
| H | 1.037573072  | 5.326261384  | -0.134038009 |
| O | 2.057375150  | -2.987823216 | 0.604500042  |
| H | 2.022018146  | -3.130290225 | 1.542537113  |
| H | 1.583698112  | -2.169009155 | 0.437102032  |
| O | -3.783023271 | 2.005135143  | -1.519399107 |
| H | -4.296013310 | 2.487800178  | -0.888529062 |
| H | -3.022463217 | 1.658567120  | -1.064655078 |
| O | 4.640406336  | -1.863660134 | 0.213230015  |
| H | 5.388272385  | -2.227042161 | -0.240506017 |
| H | 3.951156287  | -2.519617182 | 0.227312014  |

Coord\_7

|   |              |              |              |
|---|--------------|--------------|--------------|
| C | -0.672983050 | -0.333832023 | -0.158882013 |
| N | 0.641667044  | -0.476910036 | 0.043550002  |
| C | 1.317784094  | 0.678463051  | 0.041329002  |
| C | -0.609657044 | 1.940440139  | 0.247020019  |
| N | -1.307570095 | 0.850682062  | -0.214654015 |
| N | 0.739754053  | 1.890569136  | -0.001988003 |
| N | -1.430400104 | -1.424230103 | -0.306021023 |
| H | -0.987008070 | -2.308897166 | -0.465063033 |
| H | -2.359771172 | -1.298927096 | -0.660086048 |
| H | -1.132560082 | 2.885228209  | 0.242218016  |
| N | 2.649178193  | 0.659147050  | 0.055588006  |
| H | 3.154363228  | 1.519974111  | 0.151831012  |
| H | 3.154899227  | -0.201943013 | 0.087066004  |
| O | 4.188362301  | 3.388993245  | 0.455949035  |
| H | 3.507000253  | 4.041613290  | 0.321787023  |
| H | 4.957945356  | 3.695754264  | -0.004314001 |
| O | -0.156490011 | -4.176573301 | -0.732461054 |
| H | 0.710128049  | -4.037293288 | -0.362709025 |
| H | -0.045814002 | -4.582363328 | -1.581150113 |
| O | -4.099146293 | -0.810816060 | -1.909972140 |
| H | -4.213128304 | 0.132545010  | -1.961163143 |
| H | -4.882057349 | -1.212047087 | -2.261969162 |
| O | 1.702917121  | 4.668049338  | -0.187729016 |
| H | 1.315285097  | 3.799167273  | -0.245291017 |
| H | 1.025817072  | 5.328934386  | -0.195824015 |

|   |              |              |              |
|---|--------------|--------------|--------------|
| O | 2.052175148  | -2.991131214 | 0.613206045  |
| H | 2.012342145  | -3.133968224 | 1.550984110  |
| H | 1.581880113  | -2.170057154 | 0.444291032  |
| O | -3.770568269 | 2.003363145  | -1.550434109 |
| H | -4.276586309 | 2.496414178  | -0.921745068 |
| H | -3.003666216 | 1.666889120  | -1.098681080 |
| O | 4.630273332  | -1.862333133 | 0.216426018  |
| H | 5.383022386  | -2.234630161 | -0.221699015 |
| H | 3.942229284  | -2.519468182 | 0.240402017  |

Coord\_8

|   |              |              |              |
|---|--------------|--------------|--------------|
| C | -0.662824048 | -0.331479026 | -0.165344014 |
| N | 0.650426045  | -0.484365033 | 0.047283003  |
| C | 1.325727098  | 0.672643049  | 0.039208002  |
| C | -0.599189045 | 1.930302140  | 0.329062025  |
| N | -1.287591092 | 0.859349064  | -0.210637014 |
| N | 0.743096051  | 1.883252134  | 0.004180998  |
| N | -1.424353100 | -1.413201102 | -0.338750022 |
| H | -0.986739073 | -2.301016167 | -0.496713034 |
| H | -2.354306168 | -1.279570094 | -0.688107047 |
| H | -1.114682082 | 2.878751207  | 0.338973022  |
| N | 2.656588193  | 0.654866048  | 0.034561000  |
| H | 3.162001230  | 1.514986108  | 0.137411012  |
| H | 3.162529227  | -0.206416016 | 0.064882004  |
| O | 4.171203300  | 3.386501243  | 0.451687030  |
| H | 3.491868250  | 4.041210290  | 0.317715025  |
| H | 4.944437356  | 3.695384269  | -0.000997002 |
| O | -0.156832013 | -4.170911300 | -0.738021051 |
| H | 0.706109049  | -4.031864289 | -0.359370027 |
| H | -0.037402005 | -4.577687327 | -1.585038116 |
| O | -4.100781297 | -0.816954061 | -1.900725138 |
| H | -4.209505303 | 0.126727008  | -1.962792142 |
| H | -4.883420351 | -1.218011089 | -2.253536161 |
| O | 1.687702122  | 4.670898338  | -0.194720013 |
| H | 1.302726096  | 3.802468275  | -0.269298022 |
| H | 1.009497071  | 5.328019385  | -0.255346020 |
| O | 2.046347149  | -2.994263218 | 0.622226046  |
| H | 2.001611145  | -3.137372225 | 1.559719112  |
| H | 1.579563116  | -2.170985156 | 0.451502030  |
| O | -3.758113273 | 2.001592142  | -1.581469111 |
| H | -4.257159307 | 2.505028178  | -0.954962069 |
| H | -2.984869216 | 1.675210120  | -1.132706082 |
| O | 4.619493330  | -1.860691133 | 0.220373018  |
| H | 5.377199388  | -2.241534162 | -0.201544013 |
| H | 3.932646286  | -2.518840180 | 0.254143020  |

Coord\_9

|   |              |              |              |
|---|--------------|--------------|--------------|
| C | -0.651994044 | -0.326939024 | -0.173141012 |
| N | 0.659596046  | -0.491315035 | 0.050098004  |
| C | 1.334806096  | 0.667162048  | 0.036215002  |
| C | -0.583736043 | 1.915040139  | 0.413494028  |
| N | -1.263665089 | 0.871716064  | -0.207097014 |
| N | 0.746421052  | 1.875695133  | 0.010509000  |
| N | -1.418931102 | -1.398125102 | -0.373953025 |
| H | -0.988597072 | -2.289658165 | -0.531385040 |
| H | -2.348990169 | -1.254510090 | -0.718962050 |
| H | -1.085694081 | 2.870125205  | 0.437152029  |
| N | 2.664817191  | 0.649840044  | 0.011905001  |
| H | 3.171509227  | 1.508571109  | 0.121398008  |
| H | 3.170327231  | -0.212035016 | 0.040467004  |
| O | 4.148705298  | 3.383304246  | 0.446376033  |
| H | 3.471824248  | 4.040520290  | 0.312463020  |
| H | 4.925326352  | 3.692917265  | 0.000021998  |
| O | -0.157334011 | -4.165984300 | -0.743023051 |
| H | 0.701751052  | -4.026802291 | -0.355457026 |
| H | -0.028943000 | -4.574184327 | -1.588033116 |
| O | -4.102415296 | -0.823091062 | -1.891479136 |
| H | -4.205882301 | 0.120910011  | -1.964422140 |
| H | -4.884784353 | -1.223975086 | -2.245102161 |
| O | 1.667550121  | 4.674391337  | -0.201705016 |
| H | 1.287532094  | 3.805720276  | -0.293045020 |
| H | 0.987909073  | 5.323583382  | -0.312326022 |
| O | 2.039796147  | -2.997188214 | 0.631633045  |
| H | 1.989700143  | -3.140397225 | 1.568823114  |
| H | 1.576664113  | -2.171782155 | 0.458734031  |
| O | -3.745657271 | 1.999820145  | -1.612504114 |
| H | -4.237732305 | 2.513643184  | -0.988179070 |
| H | -2.966072216 | 1.683532120  | -1.166731083 |
| O | 4.607953334  | -1.858690134 | 0.225043018  |
| H | 5.370676384  | -2.247731161 | -0.180026015 |
| H | 3.922290282  | -2.517686182 | 0.268564021  |

Coord\_10

|   |              |              |              |
|---|--------------|--------------|--------------|
| C | -0.650393045 | -0.411435031 | -0.113881008 |
| N | 0.667911050  | -0.576125040 | 0.077044006  |
| C | 1.328062097  | 0.592721044  | 0.059158005  |
| C | -0.580228042 | 1.789910130  | 0.608397046  |
| N | -1.260884088 | 0.788815055  | -0.094298005 |
| N | 0.717123053  | 1.790534131  | 0.085353004  |
| N | -1.417312100 | -1.475636106 | -0.340000023 |
| H | -0.989652072 | -2.362711169 | -0.527389037 |
| H | -2.358813170 | -1.326130098 | -0.649611048 |
| H | -1.071411079 | 2.748052200  | 0.677246049  |
| N | 2.654982193  | 0.593229043  | -0.026485004 |

|   |              |              |              |
|---|--------------|--------------|--------------|
| H | 3.156471227  | 1.454190103  | 0.090558007  |
| H | 3.170841226  | -0.263230020 | -0.032347002 |
| O | 4.079873292  | 3.338533241  | 0.435365029  |
| H | 3.393767244  | 3.992053285  | 0.334504025  |
| H | 4.841813350  | 3.666051265  | -0.023349004 |
| O | -0.136873008 | -4.235285305 | -0.766947054 |
| H | 0.728066052  | -4.091696297 | -0.394011028 |
| H | -0.019987004 | -4.627597336 | -1.621099116 |
| O | -4.051770292 | -0.709232052 | -1.926949141 |
| H | -4.147753297 | 0.238829017  | -1.907439138 |
| H | -4.839022348 | -1.067751077 | -2.313688168 |
| O | 1.566507112  | 4.616540331  | -0.112995006 |
| H | 1.201576088  | 3.744312272  | -0.226090017 |
| H | 0.872186063  | 5.247531378  | -0.237589017 |
| O | 2.080192152  | -3.070618219 | 0.576768043  |
| H | 2.054780150  | -3.232068235 | 1.511974110  |
| H | 1.605238113  | -2.246189160 | 0.431254031  |
| O | -3.668946266 | 2.075065149  | -1.389238099 |
| H | -4.145475300 | 2.530207183  | -0.708835052 |
| H | -2.879247210 | 1.721269126  | -0.990870074 |
| O | 4.614780335  | -1.885520134 | 0.110130009  |
| H | 5.375323386  | -2.264812161 | -0.308118020 |
| H | 3.940678286  | -2.555113185 | 0.171456011  |

LIIC path connecting S1-MIN and S<sub>1</sub>/S<sub>0</sub>

Coord\_1

|   |              |              |              |
|---|--------------|--------------|--------------|
| C | -0.650393045 | -0.411435031 | -0.113881008 |
| N | 0.667911050  | -0.576125040 | 0.077044006  |
| C | 1.328062097  | 0.592721044  | 0.059158005  |
| C | -0.580228042 | 1.789910130  | 0.608397046  |
| N | -1.260884088 | 0.788815055  | -0.094298005 |
| N | 0.717123053  | 1.790534131  | 0.085353004  |
| N | -1.417312100 | -1.475636106 | -0.340000023 |
| H | -0.989652072 | -2.362711169 | -0.527389037 |
| H | -2.358813170 | -1.326130098 | -0.649611048 |
| H | -1.071411079 | 2.748052200  | 0.677246049  |
| N | 2.654982193  | 0.593229043  | -0.026485004 |
| H | 3.156471227  | 1.454190103  | 0.090558007  |
| H | 3.170841226  | -0.263230020 | -0.032347002 |
| O | 4.079873292  | 3.338533241  | 0.435365029  |
| H | 3.393767244  | 3.992053285  | 0.334504025  |
| H | 4.841813350  | 3.666051265  | -0.023349004 |
| O | -0.136873008 | -4.235285305 | -0.766947054 |
| H | 0.728066052  | -4.091696297 | -0.394011028 |
| H | -0.019987004 | -4.627597336 | -1.621099116 |
| O | -4.051770292 | -0.709232052 | -1.926949141 |
| H | -4.147753297 | 0.238829017  | -1.907439138 |

S21

|   |              |              |              |
|---|--------------|--------------|--------------|
| H | -4.839022348 | -1.067751077 | -2.313688168 |
| O | 1.566507112  | 4.616540331  | -0.112995006 |
| H | 1.201576088  | 3.744312272  | -0.226090017 |
| H | 0.872186063  | 5.247531378  | -0.237589017 |
| O | 2.080192152  | -3.070618219 | 0.576768043  |
| H | 2.054780150  | -3.232068235 | 1.511974110  |
| H | 1.605238113  | -2.246189160 | 0.431254031  |
| O | -3.668946266 | 2.075065149  | -1.389238099 |
| H | -4.145475300 | 2.530207183  | -0.708835052 |
| H | -2.879247210 | 1.721269126  | -0.990870074 |
| O | 4.614780335  | -1.885520134 | 0.110130009  |
| H | 5.375323386  | -2.264812161 | -0.308118020 |
| H | 3.940678286  | -2.555113185 | 0.171456011  |

Coord\_2

|   |              |              |              |
|---|--------------|--------------|--------------|
| C | -0.647069045 | -0.415356028 | -0.117590006 |
| N | 0.670139051  | -0.582680043 | 0.075349003  |
| C | 1.328324093  | 0.586835042  | 0.060233002  |
| C | -0.577081041 | 1.775931130  | 0.632940044  |
| N | -1.253005089 | 0.788470058  | -0.098919008 |
| N | 0.712806051  | 1.783626129  | 0.084875004  |
| N | -1.416524103 | -1.475404105 | -0.347650026 |
| H | -0.992217073 | -2.365035173 | -0.531145037 |
| H | -2.358237171 | -1.322815093 | -0.655389050 |
| H | -1.068867075 | 2.732347198  | 0.719709052  |
| N | 2.654248193  | 0.591600045  | -0.022975003 |
| H | 3.152790228  | 1.454793106  | 0.090963008  |
| H | 3.173010228  | -0.263225019 | -0.032268001 |
| O | 4.069455295  | 3.337826239  | 0.431533029  |
| H | 3.380744245  | 3.988222285  | 0.327637024  |
| H | 4.831799348  | 3.668587262  | -0.024221004 |
| O | -0.137643008 | -4.235799305 | -0.762955057 |
| H | 0.727982050  | -4.093169294 | -0.391181031 |
| H | -0.022453001 | -4.631748334 | -1.615667117 |
| O | -4.046830290 | -0.703296048 | -1.920990139 |
| H | -4.137487296 | 0.245446019  | -1.903568137 |
| H | -4.835216346 | -1.058339078 | -2.308583168 |
| O | 1.552422112  | 4.608096334  | -0.118650006 |
| H | 1.188001088  | 3.735607269  | -0.232601019 |
| H | 0.860481064  | 5.239132377  | -0.255692017 |
| O | 2.083015148  | -3.074541222 | 0.576926039  |
| H | 2.057572147  | -3.235146231 | 1.512274111  |
| H | 1.607631116  | -2.250409163 | 0.430660030  |
| O | -3.652264260 | 2.082324148  | -1.395183098 |
| H | -4.124301299 | 2.542466182  | -0.714993051 |
| H | -2.860218208 | 1.730732127  | -0.999117074 |
| O | 4.612460332  | -1.879333137 | 0.108615006  |

|   |             |              |              |
|---|-------------|--------------|--------------|
| H | 5.376070389 | -2.256676161 | -0.305839023 |
| H | 3.941403285 | -2.551928184 | 0.170962014  |

Coord\_3

|   |              |              |              |
|---|--------------|--------------|--------------|
| C | -0.643631049 | -0.419145032 | -0.121342010 |
| N | 0.672493048  | -0.589146044 | 0.073633003  |
| C | 1.328604097  | 0.581130040  | 0.061242006  |
| C | -0.573689041 | 1.761202127  | 0.657364045  |
| N | -1.244748087 | 0.788389057  | -0.103583007 |
| N | 0.708106052  | 1.776687128  | 0.084264005  |
| N | -1.415630100 | -1.475005105 | -0.355306025 |
| H | -0.994736074 | -2.367190168 | -0.534876038 |
| H | -2.357530169 | -1.319300097 | -0.661187049 |
| H | -1.066056075 | 2.715550197  | 0.762169055  |
| N | 2.653515192  | 0.590266042  | -0.019489000 |
| H | 3.149028227  | 1.455713107  | 0.091313006  |
| H | 3.175269228  | -0.262845017 | -0.032145004 |
| O | 4.058269292  | 3.337856238  | 0.427267030  |
| H | 3.366817241  | 3.984956288  | 0.320380025  |
| H | 4.820868345  | 3.672000265  | -0.025619000 |
| O | -0.138634009 | -4.236156304 | -0.758936057 |
| H | 0.727676054  | -4.094577297 | -0.388289029 |
| H | -0.025162002 | -4.635784332 | -1.610168113 |
| O | -4.042116289 | -0.696198051 | -1.915745135 |
| H | -4.127211298 | 0.253200016  | -1.899916137 |
| H | -4.831841349 | -1.047371075 | -2.304105165 |
| O | 1.537273111  | 4.599748330  | -0.124625010 |
| H | 1.173545082  | 3.726911268  | -0.239358019 |
| H | 0.847756061  | 5.230622376  | -0.274114021 |
| O | 2.085674153  | -3.078517222 | 0.577164042  |
| H | 2.060138149  | -3.238225233 | 1.512660109  |
| H | 1.609968116  | -2.254632161 | 0.430083031  |
| O | -3.635039260 | 2.090326150  | -1.400703100 |
| H | -4.102187294 | 2.555223185  | -0.720357051 |
| H | -2.840554203 | 1.740557123  | -1.007494071 |
| O | 4.610126332  | -1.873614133 | 0.107258005  |
| H | 5.376763389  | -2.249067164 | -0.303350022 |
| H | 3.942038282  | -2.549108182 | 0.170617011  |

Coord\_4

|   |              |              |              |
|---|--------------|--------------|--------------|
| C | -0.640082048 | -0.422795032 | -0.125126008 |
| N | 0.674971048  | -0.595522042 | 0.071907007  |
| C | 1.328893096  | 0.575614040  | 0.062198007  |
| C | -0.570051043 | 1.745714125  | 0.681657049  |
| N | -1.236105088 | 0.788577058  | -0.108275010 |
| N | 0.703002053  | 1.769713128  | 0.083529004  |
| N | -1.414636104 | -1.474435107 | -0.362958024 |

|   |              |              |              |
|---|--------------|--------------|--------------|
| H | -0.997219074 | -2.369171169 | -0.538571039 |
| H | -2.356700171 | -1.315577097 | -0.666991049 |
| H | -1.062980079 | 2.697641193  | 0.804622056  |
| N | 2.652774191  | 0.589240042  | -0.016013999 |
| H | 3.145172224  | 1.456969104  | 0.091620008  |
| H | 3.177612229  | -0.262074017 | -0.031962004 |
| O | 4.046304293  | 3.338638241  | 0.422517029  |
| H | 3.351968242  | 3.982263289  | 0.312702023  |
| H | 4.808997344  | 3.676320267  | -0.027604002 |
| O | -0.139851011 | -4.236352306 | -0.754895053 |
| H | 0.727140050  | -4.095919296 | -0.385337030 |
| H | -0.028117002 | -4.639703334 | -1.604607117 |
| O | -4.037615292 | -0.687908050 | -1.911240138 |
| H | -4.116901295 | 0.262118018  | -1.896500139 |
| H | -4.828882349 | -1.034799072 | -2.300292167 |
| O | 1.521030111  | 4.591488328  | -0.130910011 |
| H | 1.158182082  | 3.718215266  | -0.246356018 |
| H | 0.833987059  | 5.221996374  | -0.292858019 |
| O | 2.088162148  | -3.082550224 | 0.577486041  |
| H | 2.062466148  | -3.241307236 | 1.513137109  |
| H | 1.612245118  | -2.258856160 | 0.429524029  |
| O | -3.617243262 | 2.099096151  | -1.405783101 |
| H | -4.079109292 | 2.568483187  | -0.724908055 |
| H | -2.820237205 | 1.750755125  | -1.015990076 |
| O | 4.607782331  | -1.868371135 | 0.106066007  |
| H | 5.377403386  | -2.241997160 | -0.300643021 |
| H | 3.942579281  | -2.546661182 | 0.170429010  |

Coord\_5

|   |              |              |              |
|---|--------------|--------------|--------------|
| C | -0.636427047 | -0.426304033 | -0.128932010 |
| N | 0.677570049  | -0.601803043 | 0.070178005  |
| C | 1.329181096  | 0.570294041  | 0.063115002  |
| C | -0.566169041 | 1.729455122  | 0.705809053  |
| N | -1.227069090 | 0.789038056  | -0.112980009 |
| N | 0.697477051  | 1.762701127  | 0.082679008  |
| N | -1.413547099 | -1.473686104 | -0.370596025 |
| H | -0.999672070 | -2.370971171 | -0.542222040 |
| H | -2.355750171 | -1.311636097 | -0.672793049 |
| H | -1.059641076 | 2.678597194  | 0.847064061  |
| N | 2.652014192  | 0.588540041  | -0.012535003 |
| H | 3.141203225  | 1.458576104  | 0.091902006  |
| H | 3.180035231  | -0.260889019 | -0.031704004 |
| O | 4.033548290  | 3.340190238  | 0.417230030  |
| H | 3.336176238  | 3.980149289  | 0.304571024  |
| H | 4.796162346  | 3.681577267  | -0.030240003 |
| O | -0.141297009 | -4.236381305 | -0.750840052 |
| H | 0.726369055  | -4.097191295 | -0.382326027 |



|   |              |              |              |
|---|--------------|--------------|--------------|
| H | -0.031320001 | -4.643499334 | -1.598989117 |
| O | -4.033314288 | -0.678395047 | -1.907505137 |
| H | -4.106532295 | 0.272229018  | -1.893332135 |
| H | -4.826324348 | -1.020568073 | -2.297179166 |
| O | 1.503663106  | 4.583307333  | -0.137495008 |
| H | 1.141883084  | 3.709506268  | -0.253588019 |
| H | 0.819150056  | 5.213243375  | -0.311925022 |
| O | 2.090469149  | -3.086640225 | 0.577897043  |
| H | 2.064545148  | -3.244391233 | 1.513709108  |
| H | 1.614454116  | -2.263082164 | 0.428986030  |
| O | -3.598849257 | 2.108655151  | -1.410407099 |
| H | -4.055036294 | 2.582254184  | -0.728622053 |
| H | -2.799249199 | 1.761334125  | -1.024590074 |
| O | 4.605427333  | -1.863614133 | 0.105045007  |
| H | 5.377992387  | -2.235480162 | -0.297708024 |
| H | 3.943026283  | -2.544594184 | 0.170404012  |

Coord\_6

|   |              |              |              |
|---|--------------|--------------|--------------|
| C | -0.632666046 | -0.429666034 | -0.132748008 |
| N | 0.680285051  | -0.607985045 | 0.068459005  |
| C | 1.329460094  | 0.565176040  | 0.064005004  |
| C | -0.562044040 | 1.712412122  | 0.729806050  |
| N | -1.217631087 | 0.789780058  | -0.117686009 |
| N | 0.691510048  | 1.755645125  | 0.081724007  |
| N | -1.412368103 | -1.472752106 | -0.378209028 |
| H | -1.002103073 | -2.372585172 | -0.545816037 |
| H | -2.354684170 | -1.307468096 | -0.678581047 |
| H | -1.056042078 | 2.658394191  | 0.889488063  |
| N | 2.651225188  | 0.588182042  | -0.009037998 |
| H | 3.137105224  | 1.460556105  | 0.092173009  |
| H | 3.182531227  | -0.259271018 | -0.031357001 |
| O | 4.019987287  | 3.342529239  | 0.411352029  |
| H | 3.319419237  | 3.978623285  | 0.295952023  |
| H | 4.782334346  | 3.687804265  | -0.033592002 |
| O | -0.142978009 | -4.236236305 | -0.746776056 |
| H | 0.725356051  | -4.098389294 | -0.379259027 |
| H | -0.034776005 | -4.647164337 | -1.593319115 |
| O | -4.029203290 | -0.667624046 | -1.904571135 |
| H | -4.096079292 | 0.283566021  | -1.890427137 |
| H | -4.824156346 | -1.004618072 | -2.294808166 |
| O | 1.485137108  | 4.575192331  | -0.144371010 |
| H | 1.124617084  | 3.700772267  | -0.261048021 |
| H | 0.803216058  | 5.204352377  | -0.331317024 |
| O | 2.092588150  | -3.090789223 | 0.578402042  |
| H | 2.066362146  | -3.247476236 | 1.514383110  |
| H | 1.616591119  | -2.267311164 | 0.428469029  |
| O | -3.579825256 | 2.119028152  | -1.414558103 |

|   |              |              |              |
|---|--------------|--------------|--------------|
| H | -4.029934290 | 2.596537186  | -0.731472054 |
| H | -2.777568199 | 1.772301127  | -1.033284075 |
| O | 4.603065329  | -1.859351134 | 0.104203007  |
| H | 5.378529385  | -2.229530162 | -0.294535019 |
| H | 3.943376286  | -2.542916184 | 0.170551012  |

Coord\_7

|   |              |              |              |
|---|--------------|--------------|--------------|
| C | -0.628802047 | -0.432877033 | -0.136561010 |
| N | 0.683117049  | -0.614065043 | 0.066758007  |
| C | 1.329720094  | 0.560268042  | 0.064882004  |
| C | -0.557673042 | 1.694572123  | 0.753635055  |
| N | -1.207781088 | 0.790805058  | -0.122376007 |
| N | 0.685080047  | 1.748539127  | 0.080673008  |
| N | -1.411103100 | -1.471627107 | -0.385785026 |
| H | -1.004518074 | -2.374005172 | -0.549342040 |
| H | -2.353505168 | -1.303064092 | -0.684342052 |
| H | -1.052181074 | 2.637004190  | 0.931886067  |
| N | 2.650394190  | 0.588183042  | -0.005504999 |
| H | 3.132859227  | 1.462926105  | 0.092450007  |
| H | 3.185097229  | -0.257197018 | -0.030903004 |
| O | 4.005606287  | 3.345677240  | 0.404822030  |
| H | 3.301673236  | 3.977696288  | 0.286810021  |
| H | 4.767481341  | 3.695038266  | -0.037732005 |
| O | -0.144898013 | -4.235908305 | -0.742712054 |
| H | 0.724095053  | -4.099508297 | -0.376138030 |
| H | -0.038486003 | -4.650690335 | -1.587605112 |
| O | -4.025276292 | -0.655554047 | -1.902472137 |
| H | -4.085520296 | 0.296162022  | -1.887802137 |
| H | -4.822370346 | -0.986879072 | -2.293220163 |
| O | 1.465418107  | 4.567132331  | -0.151526011 |
| H | 1.106353081  | 3.692000265  | -0.268730019 |
| H | 0.786158056  | 5.195310373  | -0.351038026 |
| O | 2.094509153  | -3.094997225 | 0.579007039  |
| H | 2.067904148  | -3.250563234 | 1.515163107  |
| H | 1.618650116  | -2.271541163 | 0.427976032  |
| O | -3.560137258 | 2.130236153  | -1.418214104 |
| H | -4.003767290 | 2.611334188  | -0.733429052 |
| H | -2.755174201 | 1.783663129  | -1.042055077 |
| O | 4.600696330  | -1.855596135 | 0.103549007  |
| H | 5.379017387  | -2.224163162 | -0.291113020 |
| H | 3.943626285  | -2.541637184 | 0.170878012  |

Coord\_8

|   |              |              |              |
|---|--------------|--------------|--------------|
| C | -0.624835043 | -0.435931032 | -0.140361011 |
| N | 0.686063047  | -0.620038046 | 0.065087002  |
| C | 1.329953096  | 0.555579040  | 0.065760005  |
| C | -0.553058039 | 1.675920122  | 0.777281055  |

|   |              |              |              |
|---|--------------|--------------|--------------|
| N | -1.197510085 | 0.792117058  | -0.127036010 |
| N | 0.678168051  | 1.741378126  | 0.079538008  |
| N | -1.409753100 | -1.470303106 | -0.393313028 |
| H | -1.006922073 | -2.375225169 | -0.552790037 |
| H | -2.352215171 | -1.298416096 | -0.690065051 |
| H | -1.048060074 | 2.614397188  | 0.974251072  |
| N | 2.649511189  | 0.588563044  | -0.001918998 |
| H | 3.128447228  | 1.465709106  | 0.092752008  |
| H | 3.187727229  | -0.254642018 | -0.030324005 |
| O | 3.990388287  | 3.349658241  | 0.397581027  |
| H | 3.282910235  | 3.977378284  | 0.277106021  |
| H | 4.751571341  | 3.703319265  | -0.042733005 |
| O | -0.147061009 | -4.235388304 | -0.738656053 |
| H | 0.722579050  | -4.100544294 | -0.372967025 |
| H | -0.042454002 | -4.654069338 | -1.581854114 |
| O | -4.021530288 | -0.642142045 | -1.901246139 |
| H | -4.074834292 | 0.310057021  | -1.885474138 |
| H | -4.820961348 | -0.967277071 | -2.292461164 |
| O | 1.444466106  | 4.559111327  | -0.158951013 |
| H | 1.087056077  | 3.683172265  | -0.276628021 |
| H | 0.767945056  | 5.186104371  | -0.371091028 |
| O | 2.096224153  | -3.099266225 | 0.579716042  |
| H | 2.069157150  | -3.253650237 | 1.516054109  |
| H | 1.620628117  | -2.275773163 | 0.427509033  |
| O | -3.539748255 | 2.142302156  | -1.421354104 |
| H | -3.976491288 | 2.626643191  | -0.734462053 |
| H | -2.732042196 | 1.795426131  | -1.050892077 |
| O | 4.598325330  | -1.852361131 | 0.103092010  |
| H | 5.379458388  | -2.219399159 | -0.287429021 |
| H | 3.943776286  | -2.540768185 | 0.171395013  |

Coord\_9

|   |              |              |              |
|---|--------------|--------------|--------------|
| C | -0.620766046 | -0.438826034 | -0.144134013 |
| N | 0.689124052  | -0.625900044 | 0.063457004  |
| C | 1.330150093  | 0.551118038  | 0.066655002  |
| C | -0.548198038 | 1.656442119  | 0.800727057  |
| N | -1.186805084 | 0.793721057  | -0.131648007 |
| N | 0.670751049  | 1.734154126  | 0.078327007  |
| N | -1.408321104 | -1.468777107 | -0.400780031 |
| H | -1.009320072 | -2.376240173 | -0.556146043 |
| H | -2.350815169 | -1.293517094 | -0.695738048 |
| H | -1.043679074 | 2.590544184  | 1.016571075  |
| N | 2.648564189  | 0.589342040  | 0.001736998  |
| H | 3.123849222  | 1.468927107  | 0.093097005  |
| H | 3.190418228  | -0.251581019 | -0.029601001 |
| O | 3.974316285  | 3.354499244  | 0.389561029  |
| H | 3.263100236  | 3.977681286  | 0.266799019  |

|   |              |              |              |
|---|--------------|--------------|--------------|
| H | 4.734567342  | 3.712691270  | -0.048674004 |
| O | -0.149473009 | -4.234666305 | -0.734619055 |
| H | 0.720801052  | -4.101490294 | -0.369751024 |
| H | -0.046684001 | -4.657289334 | -1.576075112 |
| O | -4.017965290 | -0.627337046 | -1.900934136 |
| H | -4.063998292 | 0.325291023  | -1.883461137 |
| H | -4.819926346 | -0.945727069 | -2.292578165 |
| O | 1.422240101  | 4.551116327  | -0.166635011 |
| H | 1.066691077  | 3.674273266  | -0.284736022 |
| H | 0.748549053  | 5.176717370  | -0.391479026 |
| O | 2.097723153  | -3.103598223 | 0.580536044  |
| H | 2.070107150  | -3.256737234 | 1.517062107  |
| H | 1.622519116  | -2.280007163 | 0.427069033  |
| O | -3.518619255 | 2.155248155  | -1.423954100 |
| H | -3.948063283 | 2.642462188  | -0.734536054 |
| H | -2.708150193 | 1.807593128  | -1.059779075 |
| O | 4.595954330  | -1.849661131 | 0.102842005  |
| H | 5.379853387  | -2.215256162 | -0.283470018 |
| H | 3.943822282  | -2.540322184 | 0.172112011  |

Coord\_10

|   |              |              |              |
|---|--------------|--------------|--------------|
| C | -0.615783043 | -0.442862031 | -0.147472010 |
| N | 0.693131051  | -0.632841045 | 0.062245003  |
| C | 1.331031094  | 0.545752038  | 0.067935003  |
| C | -0.542433039 | 1.634818116  | 0.824357060  |
| N | -1.174951085 | 0.794264057  | -0.135785009 |
| N | 0.663439048  | 1.725661122  | 0.077424008  |
| N | -1.405914099 | -1.468414107 | -0.407765028 |
| H | -1.010745072 | -2.378380171 | -0.559002039 |
| H | -2.348434168 | -1.289810091 | -0.700915052 |
| H | -1.038455073 | 2.564064187  | 1.059250078  |
| N | 2.648268188  | 0.589514044  | 0.005805000  |
| H | 3.119696223  | 1.471618106  | 0.093822004  |
| H | 3.193960228  | -0.248964015 | -0.028405002 |
| O | 3.957864286  | 3.359311243  | 0.380991030  |
| H | 3.242652235  | 3.977643286  | 0.256165017  |
| H | 4.716882338  | 3.722351268  | -0.055357004 |
| O | -0.151016011 | -4.234992305 | -0.730240055 |
| H | 0.719874050  | -4.103528293 | -0.366141025 |
| H | -0.050040006 | -4.661589338 | -1.569909113 |
| O | -4.013801290 | -0.612674042 | -1.901106135 |
| H | -4.052288293 | 0.340314026  | -1.881303137 |
| H | -4.818463346 | -0.923795069 | -2.293128166 |
| O | 1.399079102  | 4.541993327  | -0.174201012 |
| H | 1.045676078  | 3.664118265  | -0.292677019 |
| H | 0.728260054  | 5.165940374  | -0.411824029 |
| O | 2.100053153  | -3.109070223 | 0.581794041  |

|   |              |              |              |
|---|--------------|--------------|--------------|
| H | 2.071832151  | -3.260906236 | 1.518514111  |
| H | 1.625302117  | -2.285357166 | 0.426995033  |
| O | -3.496148251 | 2.167546155  | -1.425514104 |
| H | -3.917898280 | 2.657195191  | -0.733131051 |
| H | -2.682875195 | 1.818687133  | -1.068251076 |
| O | 4.594523329  | -1.848372135 | 0.103080008  |
| H | 5.381163386  | -2.212549161 | -0.278971022 |
| H | 3.944761286  | -2.541226183 | 0.173322012  |

LIIC path connecting S<sub>1</sub>/S<sub>0</sub> and S<sub>0</sub>-MIN

Coord\_1

|   |              |              |              |
|---|--------------|--------------|--------------|
| C | -0.615783043 | -0.442862031 | -0.147472010 |
| N | 0.693131051  | -0.632841045 | 0.062245003  |
| C | 1.331031094  | 0.545752038  | 0.067935003  |
| C | -0.542433039 | 1.634818116  | 0.824357060  |
| N | -1.174951085 | 0.794264057  | -0.135785009 |
| N | 0.663439048  | 1.725661122  | 0.077424008  |
| N | -1.405914099 | -1.468414107 | -0.407765028 |
| H | -1.010745072 | -2.378380171 | -0.559002039 |
| H | -2.348434168 | -1.289810091 | -0.700915052 |
| H | -1.038455073 | 2.564064187  | 1.059250078  |
| N | 2.648268188  | 0.589514044  | 0.005805000  |
| H | 3.119696223  | 1.471618106  | 0.093822004  |
| H | 3.193960228  | -0.248964015 | -0.028405002 |
| O | 3.957864286  | 3.359311243  | 0.380991030  |
| H | 3.242652235  | 3.977643286  | 0.256165017  |
| H | 4.716882338  | 3.722351268  | -0.055357004 |
| O | -0.151016011 | -4.234992305 | -0.730240055 |
| H | 0.719874050  | -4.103528293 | -0.366141025 |
| H | -0.050040006 | -4.661589338 | -1.569909113 |
| O | -4.013801290 | -0.612674042 | -1.901106135 |
| H | -4.052288293 | 0.340314026  | -1.881303137 |
| H | -4.818463346 | -0.923795069 | -2.293128166 |
| O | 1.399079102  | 4.541993327  | -0.174201012 |
| H | 1.045676078  | 3.664118265  | -0.292677019 |
| H | 0.728260054  | 5.165940374  | -0.411824029 |
| O | 2.100053153  | -3.109070223 | 0.581794041  |
| H | 2.071832151  | -3.260906236 | 1.518514111  |
| H | 1.625302117  | -2.285357166 | 0.426995033  |
| O | -3.496148251 | 2.167546155  | -1.425514104 |
| H | -3.917898280 | 2.657195191  | -0.733131051 |
| H | -2.682875195 | 1.818687133  | -1.068251076 |
| O | 4.594523329  | -1.848372135 | 0.103080008  |
| H | 5.381163386  | -2.212549161 | -0.278971022 |
| H | 3.944761286  | -2.541226183 | 0.173322012  |

Coord\_2

|   |              |              |              |
|---|--------------|--------------|--------------|
| C | -0.627850047 | -0.427978032 | -0.146680012 |
| N | 0.682367051  | -0.609365044 | 0.056416005  |
| C | 1.326608093  | 0.565132038  | 0.065564003  |
| C | -0.547157041 | 1.667097118  | 0.712749054  |
| N | -1.196044085 | 0.802234059  | -0.147656010 |
| N | 0.670122048  | 1.748724127  | 0.065323005  |
| N | -1.414072102 | -1.463290105 | -0.379417029 |
| H | -1.012320073 | -2.369372172 | -0.533480037 |
| H | -2.353925171 | -1.293130091 | -0.683225048 |
| H | -1.041842078 | 2.600120187  | 0.911440066  |
| N | 2.645126193  | 0.598624042  | 0.023642999  |
| H | 3.122210223  | 1.477437108  | 0.108670009  |
| H | 3.184982228  | -0.242999018 | -0.003587002 |
| O | 3.984331287  | 3.362712244  | 0.388544029  |
| H | 3.272351234  | 3.984444287  | 0.263066018  |
| H | 4.741075343  | 3.715343268  | -0.058115002 |
| O | -0.151344011 | -4.233070307 | -0.726587055 |
| H | 0.721129052  | -4.100020298 | -0.367660028 |
| H | -0.054645002 | -4.657304336 | -1.567849110 |
| O | -4.022181288 | -0.630502045 | -1.908330140 |
| H | -4.072567291 | 0.321202023  | -1.889167134 |
| H | -4.824607348 | -0.951757070 | -2.295358166 |
| O | 1.433030104  | 4.555886331  | -0.170414013 |
| H | 1.079945078  | 3.676959264  | -0.271068019 |
| H | 0.763812055  | 5.176158374  | -0.344035026 |
| O | 2.097453151  | -3.093400221 | 0.579692044  |
| H | 2.070321149  | -3.244022232 | 1.516657107  |
| H | 1.621102117  | -2.271544164 | 0.424067031  |
| O | -3.534942256 | 2.150584156  | -1.418789103 |
| H | -3.970702285 | 2.633685190  | -0.732027055 |
| H | -2.731045194 | 1.796378131  | -1.049036073 |
| O | 4.604486329  | -1.850251132 | 0.114687008  |
| H | 5.384271387  | -2.208680161 | -0.283117020 |
| H | 3.949670283  | -2.538076181 | 0.172896013  |

Coord\_3

|   |              |              |              |
|---|--------------|--------------|--------------|
| C | -0.639918045 | -0.413092027 | -0.145888008 |
| N | 0.671602046  | -0.585890043 | 0.050588006  |
| C | 1.322184097  | 0.584511044  | 0.063194003  |
| C | -0.551881038 | 1.699377121  | 0.601141042  |
| N | -1.217138090 | 0.810204061  | -0.159528012 |
| N | 0.676804049  | 1.771787127  | 0.053223002  |
| N | -1.422229104 | -1.458166103 | -0.351069025 |
| H | -1.013895073 | -2.360363167 | -0.507958035 |
| H | -2.359415168 | -1.296450091 | -0.665534050 |
| H | -1.045230077 | 2.636176192  | 0.763629055  |
| N | 2.641983192  | 0.607733045  | 0.041481003  |

|   |              |              |              |
|---|--------------|--------------|--------------|
| H | 3.124723227  | 1.483256105  | 0.123517008  |
| H | 3.176004228  | -0.237034016 | 0.021231004  |
| O | 4.010796288  | 3.366111245  | 0.396097029  |
| H | 3.302049238  | 3.991244289  | 0.269967018  |
| H | 4.765266343  | 3.708334268  | -0.060872005 |
| O | -0.151671010 | -4.231147303 | -0.722934054 |
| H | 0.722385054  | -4.096511297 | -0.369179026 |
| H | -0.059250003 | -4.653018333 | -1.565789113 |
| O | -4.030561291 | -0.648331048 | -1.915554140 |
| H | -4.092845294 | 0.302090019  | -1.897031137 |
| H | -4.830749349 | -0.979720071 | -2.297588167 |
| O | 1.466982106  | 4.569779329  | -0.166627009 |
| H | 1.114214078  | 3.689799263  | -0.249459018 |
| H | 0.799364055  | 5.186375374  | -0.276245018 |
| O | 2.094851150  | -3.077730224 | 0.577590040  |
| H | 2.068810147  | -3.227137234 | 1.514800107  |
| H | 1.616901116  | -2.257730161 | 0.421139030  |
| O | -3.573736256 | 2.133621152  | -1.412063101 |
| H | -4.023506289 | 2.610175189  | -0.730923054 |
| H | -2.779214199 | 1.774068130  | -1.029820075 |
| O | 4.614447334  | -1.852129135 | 0.126294008  |
| H | 5.387377388  | -2.204810160 | -0.287264023 |
| H | 3.954579286  | -2.534925184 | 0.172471010  |

Coord\_4

|   |              |              |              |
|---|--------------|--------------|--------------|
| C | -0.651985048 | -0.398207028 | -0.145096010 |
| N | 0.660837046  | -0.562414041 | 0.044759002  |
| C | 1.317761096  | 0.603890044  | 0.060823003  |
| C | -0.556605040 | 1.731656124  | 0.489533036  |
| N | -1.238231090 | 0.818174058  | -0.171399013 |
| N | 0.683487049  | 1.794849132  | 0.041122004  |
| N | -1.430386102 | -1.453042106 | -0.322722021 |
| H | -1.015470074 | -2.351355168 | -0.482437033 |
| H | -2.364905170 | -1.299770096 | -0.647843046 |
| H | -1.048617076 | 2.672232192  | 0.615819043  |
| N | 2.638841192  | 0.616842043  | 0.059319002  |
| H | 3.127236227  | 1.489075108  | 0.138364012  |
| H | 3.167025228  | -0.231069019 | 0.046050004  |
| O | 4.037261289  | 3.369511241  | 0.403650029  |
| H | 3.331747242  | 3.998044286  | 0.276868019  |
| H | 4.789457347  | 3.701325267  | -0.063630003 |
| O | -0.151998010 | -4.229223304 | -0.719281054 |
| H | 0.723640051  | -4.093002296 | -0.370697029 |
| H | -0.063855004 | -4.648731336 | -1.563729111 |
| O | -4.038940289 | -0.666159050 | -1.922778139 |
| H | -4.113123298 | 0.282977021  | -1.904895139 |
| H | -4.836892346 | -1.007682072 | -2.299817167 |

|   |              |              |              |
|---|--------------|--------------|--------------|
| O | 1.500933107  | 4.583671332  | -0.162840011 |
| H | 1.148483083  | 3.702639267  | -0.227850018 |
| H | 0.834916062  | 5.196591373  | -0.208456016 |
| O | 2.092250148  | -3.062060222 | 0.575488042  |
| H | 2.067298150  | -3.210252231 | 1.512943108  |
| H | 1.612700115  | -2.243916163 | 0.418210029  |
| O | -3.612530262 | 2.116658153  | -1.405338100 |
| H | -4.076310294 | 2.586665188  | -0.729819052 |
| H | -2.827383204 | 1.751758128  | -1.010605073 |
| O | 4.624408334  | -1.854008132 | 0.137901009  |
| H | 5.390484389  | -2.200941160 | -0.291410021 |
| H | 3.959487283  | -2.531775183 | 0.172045012  |

Coord\_5

|   |              |              |              |
|---|--------------|--------------|--------------|
| C | -0.664053047 | -0.383323029 | -0.144304011 |
| N | 0.650073046  | -0.538938040 | 0.038930004  |
| C | 1.313337095  | 0.623269044  | 0.058452003  |
| C | -0.561329043 | 1.763936126  | 0.377925030  |
| N | -1.259324090 | 0.826144060  | -0.183270015 |
| N | 0.690170050  | 1.817912132  | 0.029022001  |
| N | -1.438543104 | -1.447918104 | -0.294374022 |
| H | -1.017044075 | -2.342346169 | -0.456915032 |
| H | -2.370395172 | -1.303089096 | -0.630152047 |
| H | -1.052005075 | 2.708287197  | 0.468009032  |
| N | 2.635698191  | 0.625951046  | 0.077157006  |
| H | 3.129748226  | 1.494894110  | 0.153211011  |
| H | 3.158047228  | -0.225105017 | 0.070868005  |
| O | 4.063726295  | 3.372910241  | 0.411203029  |
| H | 3.361445240  | 4.004844287  | 0.283769019  |
| H | 4.813648346  | 3.694316267  | -0.066387006 |
| O | -0.152325010 | -4.227300306 | -0.715628053 |
| H | 0.724895053  | -4.089493295 | -0.372216027 |
| H | -0.068460005 | -4.644445334 | -1.561669114 |
| O | -4.047320292 | -0.683988048 | -1.930002139 |
| H | -4.133401296 | 0.263865017  | -1.912759136 |
| H | -4.843035348 | -1.035645073 | -2.302047168 |
| O | 1.534884109  | 4.597563331  | -0.159053012 |
| H | 1.182751083  | 3.715479267  | -0.206241017 |
| H | 0.870467062  | 5.206808373  | -0.140666013 |
| O | 2.089649152  | -3.046389220 | 0.573385039  |
| H | 2.065787148  | -3.193367232 | 1.511086108  |
| H | 1.608500115  | -2.230102161 | 0.415282028  |
| O | -3.651324262 | 2.099695154  | -1.398612098 |
| H | -4.129114299 | 2.563155182  | -0.728714051 |
| H | -2.875552209 | 1.729448126  | -0.991390070 |
| O | 4.634369333  | -1.855886134 | 0.149508009  |
| H | 5.393590389  | -2.197071160 | -0.295556019 |



H 3.964396286 -2.528624181 0.171620014

Coord\_6

C -0.676120050 -0.368437024 -0.143512013  
N 0.639308046 -0.515462038 0.033102000  
C 1.308914094 0.642648044 0.056081004  
C -0.566053040 1.796215129 0.266317018  
N -1.280417095 0.834114062 -0.195142016  
N 0.696852050 1.840974131 0.016921003  
N -1.446701102 -1.442794102 -0.266026018  
H -1.018619076 -2.333337170 -0.431394030  
H -2.375885169 -1.306409096 -0.612461043  
H -1.055392074 2.744343196 0.320198025  
N 2.632556191 0.635060044 0.094995005  
H 3.132261225 1.500713107 0.168059011  
H 3.149069228 -0.219140014 0.095687005  
O 4.090191296 3.376310242 0.418756029  
H 3.391143244 4.011644289 0.290670020  
H 4.837838351 3.687307267 -0.069145003  
O -0.152652010 -4.225377302 -0.711976053  
H 0.726150055 -4.085985295 -0.373735025  
H -0.073065006 -4.640159332 -1.559609111  
O -4.055699290 -0.701816051 -1.937226139  
H -4.153678299 0.244752018 -1.920622139  
H -4.849177349 -1.063607074 -2.304276168  
O 1.568836111 4.611456334 -0.155266013  
H 1.217020089 3.728318271 -0.184631011  
H 0.906019063 5.217024378 -0.072877005  
O 2.087048151 -3.030719218 0.571283041  
H 2.064275151 -3.176483229 1.509229109  
H 1.604299114 -2.216288158 0.412354032  
O -3.690117267 2.082732149 -1.391887102  
H -4.181917303 2.539645181 -0.727610055  
H -2.923721208 1.707138125 -0.972174072  
O 4.644330333 -1.857765132 0.161115009  
H 5.396696390 -2.193202160 -0.299703022  
H 3.969304288 -2.525473184 0.171194010

Coord\_7

C -0.688188048 -0.353552025 -0.142720009  
N 0.628543047 -0.491986037 0.027273002  
C 1.304491093 0.662027049 0.053711004  
C -0.570777042 1.828494131 0.154709012  
N -1.301511095 0.842084059 -0.207013013  
N 0.703535051 1.864037136 0.004821001  
N -1.454858105 -1.437670105 -0.237678019  
H -1.020194071 -2.324329165 -0.405872028

|   |              |              |              |
|---|--------------|--------------|--------------|
| H | -2.381375171 | -1.309729096 | -0.594770044 |
| H | -1.058780078 | 2.780399202  | 0.172388014  |
| N | 2.629413190  | 0.644169047  | 0.112833009  |
| H | 3.134774224  | 1.506533110  | 0.182906015  |
| H | 3.140090228  | -0.213175017 | 0.120505010  |
| O | 4.116656297  | 3.379709243  | 0.426308028  |
| H | 3.420841248  | 4.018444291  | 0.297570020  |
| H | 4.862029350  | 3.680298267  | -0.071902006 |
| O | -0.152979010 | -4.223454304 | -0.708323052 |
| H | 0.727405051  | -4.082476294 | -0.375254029 |
| H | -0.077669006 | -4.635872334 | -1.557549114 |
| O | -4.064078293 | -0.719645053 | -1.944449138 |
| H | -4.173956302 | 0.225640015  | -1.928486141 |
| H | -4.855320351 | -1.091569081 | -2.306506164 |
| O | 1.602787117  | 4.625348332  | -0.151478009 |
| H | 1.251289089  | 3.741158270  | -0.163022011 |
| H | 0.941571069  | 5.227241378  | -0.005087002 |
| O | 2.084447149  | -3.015048216 | 0.569181043  |
| H | 2.062764149  | -3.159598225 | 1.507372110  |
| H | 1.600098114  | -2.202474160 | 0.409425030  |
| O | -3.728911267 | 2.065769150  | -1.385161101 |
| H | -4.234721303 | 2.516135180  | -0.726506053 |
| H | -2.971890213 | 1.684828123  | -0.952959070 |
| O | 4.654292333  | -1.859643134 | 0.172722015  |
| H | 5.399803390  | -2.189333160 | -0.303849020 |
| H | 3.974213286  | -2.522323183 | 0.170768012  |

Coord\_8

|   |              |              |              |
|---|--------------|--------------|--------------|
| C | -0.700255052 | -0.338668026 | -0.141928011 |
| N | 0.617779047  | -0.468511036 | 0.021444003  |
| C | 1.300067092  | 0.681407049  | 0.051340004  |
| C | -0.575501039 | 1.860774134  | 0.043101005  |
| N | -1.322604095 | 0.850054061  | -0.218884014 |
| N | 0.710218052  | 1.887099136  | -0.007280003 |
| N | -1.463015107 | -1.432546103 | -0.209330015 |
| H | -1.021768072 | -2.315320166 | -0.380350027 |
| H | -2.386865174 | -1.313049095 | -0.577079040 |
| H | -1.062167077 | 2.816455202  | 0.024578002  |
| N | 2.626271190  | 0.653278045  | 0.130670008  |
| H | 3.137287224  | 1.512352107  | 0.197753014  |
| H | 3.131112228  | -0.207210015 | 0.145324011  |
| O | 4.143121298  | 3.383109244  | 0.433861033  |
| H | 3.450539247  | 4.025244287  | 0.304471020  |
| H | 4.886220349  | 3.673289266  | -0.074660004 |
| O | -0.153306009 | -4.221530306 | -0.704670052 |
| H | 0.728661054  | -4.078967293 | -0.376773027 |
| H | -0.082274007 | -4.631586332 | -1.555489112 |

|   |              |              |              |
|---|--------------|--------------|--------------|
| O | -4.072458291 | -0.737473051 | -1.951673138 |
| H | -4.194234301 | 0.206527016  | -1.936350139 |
| H | -4.861463353 | -1.119532082 | -2.308735164 |
| O | 1.636739119  | 4.639240336  | -0.147691010 |
| H | 1.285557094  | 3.753998269  | -0.141413010 |
| H | 0.977123070  | 5.237458377  | 0.062702006  |
| O | 2.081846148  | -2.999378214 | 0.567079040  |
| H | 2.061253147  | -3.142713227 | 1.505514110  |
| H | 1.595898113  | -2.188661158 | 0.406497029  |
| O | -3.767705272 | 2.048806146  | -1.378436099 |
| H | -4.287525307 | 2.492625179  | -0.725402052 |
| H | -3.020059217 | 1.662519121  | -0.933744067 |
| O | 4.664253338  | -1.861522131 | 0.184329015  |
| H | 5.402909391  | -2.185463160 | -0.307995023 |
| H | 3.979121288  | -2.519172181 | 0.170343014  |

Coord\_9

|   |              |              |              |
|---|--------------|--------------|--------------|
| C | -0.712323050 | -0.323782021 | -0.141136012 |
| N | 0.607014042  | -0.445035034 | 0.015615999  |
| C | 1.295644096  | 0.700786049  | 0.048969004  |
| C | -0.580225041 | 1.893053137  | -0.068507006 |
| N | -1.343697094 | 0.858024063  | -0.230756016 |
| N | 0.716900052  | 1.910161135  | -0.019380000 |
| N | -1.471172105 | -1.427422101 | -0.180982011 |
| H | -1.023343073 | -2.306311167 | -0.354829025 |
| H | -2.392355171 | -1.316368095 | -0.559388042 |
| H | -1.065554076 | 2.852510207  | -0.123232009 |
| N | 2.623128189  | 0.662387048  | 0.148508012  |
| H | 3.139800228  | 1.518171109  | 0.212600013  |
| H | 3.122133222  | -0.201245012 | 0.170142011  |
| O | 4.169587299  | 3.386508244  | 0.441414033  |
| H | 3.480237251  | 4.032044289  | 0.311372021  |
| H | 4.910411354  | 3.666280266  | -0.077417007 |
| O | -0.153633009 | -4.219607302 | -0.701017051 |
| H | 0.729916050  | -4.075458292 | -0.378292030 |
| H | -0.086879008 | -4.627300335 | -1.553428110 |
| O | -4.080837294 | -0.755302054 | -1.958897143 |
| H | -4.214512304 | 0.187415013  | -1.944213141 |
| H | -4.867605349 | -1.147494083 | -2.310965164 |
| O | 1.670690121  | 4.653133334  | -0.143904011 |
| H | 1.319826094  | 3.766838273  | -0.119804009 |
| H | 1.012675071  | 5.247674377  | 0.130492009  |
| O | 2.079245152  | -2.983708217 | 0.564976042  |
| H | 2.059741150  | -3.125828224 | 1.503657111  |
| H | 1.591697113  | -2.174847155 | 0.403569028  |
| O | -3.806498272 | 2.031843147  | -1.371711098 |
| H | -4.340329312 | 2.469115178  | -0.724297051 |

|   |              |              |              |
|---|--------------|--------------|--------------|
| H | -3.068228222 | 1.640209120  | -0.914528064 |
| O | 4.674214338  | -1.863400134 | 0.195936015  |
| H | 5.406015392  | -2.181594160 | -0.312142021 |
| H | 3.984030286  | -2.516021179 | 0.169917010  |

Coord\_10

|   |              |              |              |
|---|--------------|--------------|--------------|
| C | -0.724575054 | -0.309980020 | -0.139502008 |
| N | 0.596051045  | -0.422714031 | 0.010687999  |
| C | 1.291079095  | 0.718973051  | 0.047564002  |
| C | -0.585017043 | 1.924243140  | -0.179204013 |
| N | -1.364910096 | 0.864947061  | -0.241782016 |
| N | 0.723508053  | 1.932063141  | -0.030508000 |
| N | -1.479571105 | -1.423341101 | -0.151859011 |
| H | -1.025196072 | -2.298364163 | -0.328535022 |
| H | -2.398063173 | -1.320673095 | -0.540962037 |
| H | -1.068956077 | 2.887504206  | -0.270127020 |
| N | 2.619836188  | 0.670232048  | 0.167373012  |
| H | 3.142204227  | 1.522697109  | 0.228523015  |
| H | 3.112959226  | -0.196570012 | 0.195986012  |
| O | 4.196028301  | 3.388554245  | 0.450144034  |
| H | 3.509951252  | 4.037529291  | 0.319436021  |
| H | 4.934617355  | 3.657894262  | -0.078955008 |
| O | -0.154320013 | -4.218779304 | -0.696605052 |
| H | 0.730803052  | -4.073099294 | -0.379006028 |
| H | -0.091825006 | -4.624088335 | -1.550617109 |
| O | -4.089339294 | -0.773988054 | -1.965449140 |
| H | -4.234864308 | 0.167451012  | -1.951386139 |
| H | -4.873874353 | -1.176264085 | -2.312571165 |
| O | 1.704712122  | 4.665816337  | -0.139021012 |
| H | 1.354118097  | 3.778486274  | -0.097140009 |
| H | 1.048312074  | 5.256706380  | 0.199363015  |
| O | 2.076288152  | -2.969283216 | 0.563773042  |
| H | 2.057823147  | -3.110214224 | 1.502694109  |
| H | 1.587190115  | -2.162249154 | 0.401539030  |
| O | -3.845299278 | 2.013992146  | -1.364224097 |
| H | -4.393147319 | 2.444727176  | -0.722446052 |
| H | -3.116447223 | 1.616960114  | -0.894529064 |
| O | 4.683892339  | -1.866649134 | 0.208595015  |
| H | 5.408847389  | -2.179117155 | -0.315210022 |
| H | 3.988624285  | -2.514204180 | 0.170493014  |

LIIC path connecting S1-MIN and T1-MIN

Coord\_1

|   |              |              |              |
|---|--------------|--------------|--------------|
| C | -0.650393045 | -0.411435031 | -0.113881008 |
| N | 0.667911050  | -0.576125040 | 0.077044006  |
| C | 1.328062097  | 0.592721044  | 0.059158005  |
| C | -0.580228042 | 1.789910130  | 0.608397046  |

|   |              |              |              |
|---|--------------|--------------|--------------|
| N | -1.260884088 | 0.788815055  | -0.094298005 |
| N | 0.717123053  | 1.790534131  | 0.085353004  |
| N | -1.417312100 | -1.475636106 | -0.340000023 |
| H | -0.989652072 | -2.362711169 | -0.527389037 |
| H | -2.358813170 | -1.326130098 | -0.649611048 |
| H | -1.071411079 | 2.748052200  | 0.677246049  |
| N | 2.654982193  | 0.593229043  | -0.026485004 |
| H | 3.156471227  | 1.454190103  | 0.090558007  |
| H | 3.170841226  | -0.263230020 | -0.032347002 |
| O | 4.079873292  | 3.338533241  | 0.435365029  |
| H | 3.393767244  | 3.992053285  | 0.334504025  |
| H | 4.841813350  | 3.666051265  | -0.023349004 |
| O | -0.136873008 | -4.235285305 | -0.766947054 |
| H | 0.728066052  | -4.091696297 | -0.394011028 |
| H | -0.019987004 | -4.627597336 | -1.621099116 |
| O | -4.051770292 | -0.709232052 | -1.926949141 |
| H | -4.147753297 | 0.238829017  | -1.907439138 |
| H | -4.839022348 | -1.067751077 | -2.313688168 |
| O | 1.566507112  | 4.616540331  | -0.112995006 |
| H | 1.201576088  | 3.744312272  | -0.226090017 |
| H | 0.872186063  | 5.247531378  | -0.237589017 |
| O | 2.080192152  | -3.070618219 | 0.576768043  |
| H | 2.054780150  | -3.232068235 | 1.511974110  |
| H | 1.605238113  | -2.246189160 | 0.431254031  |
| O | -3.668946266 | 2.075065149  | -1.389238099 |
| H | -4.145475300 | 2.530207183  | -0.708835052 |
| H | -2.879247210 | 1.721269126  | -0.990870074 |
| O | 4.614780335  | -1.885520134 | 0.110130009  |
| H | 5.375323386  | -2.264812161 | -0.308118020 |
| H | 3.940678286  | -2.555113185 | 0.171456011  |

Coord\_2

|   |              |              |              |
|---|--------------|--------------|--------------|
| C | -0.659612048 | -0.402558029 | -0.115775007 |
| N | 0.661201046  | -0.565921042 | 0.078234004  |
| C | 1.325453095  | 0.603395041  | 0.064644007  |
| C | -0.589157040 | 1.809172129  | 0.576993044  |
| N | -1.273372089 | 0.792855059  | -0.099724008 |
| N | 0.722034051  | 1.802197128  | 0.089236006  |
| N | -1.420673101 | -1.472284107 | -0.339421024 |
| H | -0.988318069 | -2.357143172 | -0.526171035 |
| H | -2.361645168 | -1.327492094 | -0.653289047 |
| H | -1.078528079 | 2.769879200  | 0.617353043  |
| N | 2.653490189  | 0.595287045  | -0.011907001 |
| H | 3.159105228  | 1.454011104  | 0.104232006  |
| H | 3.164939227  | -0.263698019 | -0.017133002 |
| O | 4.102834293  | 3.322550242  | 0.418334031  |
| H | 3.417793246  | 3.979049288  | 0.329222021  |

|   |              |              |              |
|---|--------------|--------------|--------------|
| H | 4.860299348  | 3.649826261  | -0.047872004 |
| O | -0.134124011 | -4.232623305 | -0.772523053 |
| H | 0.731542053  | -4.094766292 | -0.399366027 |
| H | -0.020244004 | -4.628079332 | -1.625602118 |
| O | -4.046273294 | -0.730823055 | -1.921432140 |
| H | -4.150809301 | 0.216397013  | -1.902893135 |
| H | -4.832166349 | -1.096901081 | -2.303805163 |
| O | 1.593377113  | 4.618439331  | -0.096792006 |
| H | 1.222853088  | 3.746679271  | -0.201712017 |
| H | 0.893653064  | 5.250683379  | -0.173515013 |
| O | 2.080514151  | -3.070247218 | 0.578415044  |
| H | 2.055917145  | -3.232714233 | 1.513508110  |
| H | 1.604763113  | -2.246787162 | 0.434015029  |
| O | -3.690657266 | 2.055679148  | -1.388771100 |
| H | -4.172675302 | 2.514936181  | -0.714892052 |
| H | -2.902004208 | 1.708297123  | -0.982712071 |
| O | 4.615566332  | -1.883031133 | 0.114866008  |
| H | 5.375878387  | -2.254288164 | -0.310839023 |
| H | 3.944468285  | -2.555929182 | 0.171429012  |

Coord\_3

|   |              |              |              |
|---|--------------|--------------|--------------|
| C | -0.668514048 | -0.393682028 | -0.117803010 |
| N | 0.654890046  | -0.555604038 | 0.079200006  |
| C | 1.323092096  | 0.614293044  | 0.069572007  |
| C | -0.597209043 | 1.827553133  | 0.544953039  |
| N | -1.285262093 | 0.797004057  | -0.105463010 |
| N | 0.726649053  | 1.813776130  | 0.092440005  |
| N | -1.423609103 | -1.469036107 | -0.338532022 |
| H | -0.986503070 | -2.351666171 | -0.524433037 |
| H | -2.364068170 | -1.329157097 | -0.656566046 |
| H | -1.084369079 | 2.790173201  | 0.556849039  |
| N | 2.652125192  | 0.597656045  | 0.002004000  |
| H | 3.161832227  | 1.454164105  | 0.117023008  |
| H | 3.159243227  | -0.263779020 | -0.002464998 |
| O | 4.123583296  | 3.309848236  | 0.401700027  |
| H | 3.439112247  | 3.968502288  | 0.323649023  |
| H | 4.876407350  | 3.637522261  | -0.071663003 |
| O | -0.131940007 | -4.229677307 | -0.777585057 |
| H | 0.734459053  | -4.097703295 | -0.404272029 |
| H | -0.021205000 | -4.628516331 | -1.629485115 |
| O | -4.042713291 | -0.749259056 | -1.918378136 |
| H | -4.154945298 | 0.197119012  | -1.899384139 |
| H | -4.827867350 | -1.121691083 | -2.296077165 |
| O | 1.617389118  | 4.620594331  | -0.082093008 |
| H | 1.242529088  | 3.748876272  | -0.178517014 |
| H | 0.914201064  | 5.252643378  | -0.110108006 |
| O | 2.080632152  | -3.070015222 | 0.580246039  |

|   |              |              |              |
|---|--------------|--------------|--------------|
| H | 2.056875147  | -3.233248231 | 1.515268112  |
| H | 1.604336115  | -2.247405161 | 0.436789029  |
| O | -3.711274265 | 2.038135149  | -1.387201100 |
| H | -4.197789303 | 2.500726179  | -0.718760052 |
| H | -2.923676212 | 1.695752125  | -0.974795071 |
| O | 4.616732332  | -1.882011134 | 0.119384007  |
| H | 5.376516385  | -2.245921163 | -0.313498022 |
| H | 3.948224285  | -2.557687183 | 0.171380011  |

Coord\_4

|   |              |              |              |
|---|--------------|--------------|--------------|
| C | -0.677096049 | -0.384815028 | -0.119993010 |
| N | 0.648986047  | -0.545204038 | 0.079849005  |
| C | 1.321036095  | 0.625356045  | 0.073735008  |
| C | -0.604283043 | 1.845082134  | 0.512139038  |
| N | -1.296525091 | 0.801273057  | -0.111571006 |
| N | 0.731085051  | 1.825249132  | 0.094713007  |
| N | -1.426155102 | -1.465890106 | -0.337254022 |
| H | -0.984274070 | -2.346296170 | -0.522075039 |
| H | -2.366131168 | -1.331120096 | -0.659312047 |
| H | -1.088815078 | 2.808977202  | 0.495562037  |
| N | 2.650942190  | 0.600212045  | 0.014968001  |
| H | 3.164759228  | 1.454507107  | 0.128570010  |
| H | 3.153765226  | -0.263623019 | 0.011401002  |
| O | 4.141950297  | 3.300212236  | 0.386758030  |
| H | 3.457659248  | 3.960282287  | 0.318418021  |
| H | 4.890276350  | 3.628574260  | -0.093189008 |
| O | -0.130343008 | -4.226527305 | -0.781961056 |
| H | 0.736831053  | -4.100550295 | -0.408660030 |
| H | -0.022982004 | -4.628972334 | -1.632590116 |
| O | -4.040936292 | -0.764905054 | -1.917222138 |
| H | -4.160065299 | 0.180649011  | -1.896612134 |
| H | -4.825935350 | -1.142658080 | -2.289892162 |
| O | 1.638701118  | 4.623006331  | -0.069536007 |
| H | 1.260829091  | 3.750875271  | -0.156933011 |
| H | 0.933979069  | 5.253253376  | -0.047817001 |
| O | 2.080644148  | -3.069904222 | 0.582167043  |
| H | 2.057856146  | -3.233673235 | 1.517159111  |
| H | 1.604003114  | -2.248042164 | 0.439552033  |
| O | -3.730835271 | 2.022317147  | -1.384701097 |
| H | -4.220915306 | 2.487674180  | -0.720740053 |
| H | -2.944260212 | 1.683685121  | -0.967123070 |
| O | 4.618227332  | -1.882219137 | 0.123392011  |
| H | 5.377202389  | -2.239340161 | -0.316503024 |
| H | 3.951972283  | -2.560242183 | 0.171054011  |

Coord\_5

|   |              |              |              |
|---|--------------|--------------|--------------|
| C | -0.685347049 | -0.375978028 | -0.122371011 |
|---|--------------|--------------|--------------|

|   |              |              |              |
|---|--------------|--------------|--------------|
| N | 0.643509047  | -0.534759037 | 0.080077006  |
| C | 1.319349094  | 0.636523045  | 0.076894005  |
| C | -0.610281044 | 1.861774136  | 0.478388034  |
| N | -1.307129094 | 0.805658058  | -0.118105006 |
| N | 0.735456055  | 1.836585130  | 0.095759005  |
| N | -1.428332105 | -1.462862106 | -0.335484025 |
| H | -0.981683070 | -2.341069169 | -0.518969039 |
| H | -2.367879172 | -1.333404094 | -0.661365048 |
| H | -1.091761077 | 2.826306201  | 0.433289030  |
| N | 2.650007192  | 0.602838045  | 0.026660003  |
| H | 3.167996226  | 1.454907106  | 0.138451009  |
| H | 3.148530229  | -0.263370019 | 0.024171002  |
| O | 4.157771300  | 3.293515239  | 0.374946026  |
| H | 3.473340251  | 3.954333287  | 0.314219021  |
| H | 4.902083353  | 3.622495262  | -0.110765006 |
| O | -0.129367010 | -4.223249306 | -0.785449054 |
| H | 0.738668055  | -4.103348293 | -0.412445029 |
| H | -0.025713003 | -4.629513333 | -1.634728119 |
| O | -4.040894292 | -0.778061057 | -1.917460135 |
| H | -4.166135301 | 0.166701010  | -1.894304138 |
| H | -4.826296349 | -1.160227082 | -2.284701166 |
| O | 1.657414122  | 4.625670331  | -0.059862007 |
| H | 1.277970094  | 3.752638268  | -0.137450012 |
| H | 0.953166068  | 5.252338376  | 0.012852001  |
| O | 2.080660151  | -3.069893220 | 0.584079045  |
| H | 2.059085150  | -3.233987233 | 1.519082109  |
| H | 1.603828115  | -2.248697163 | 0.442274031  |
| O | -3.749365269 | 2.008116146  | -1.381407101 |
| H | -4.242122307 | 2.475856176  | -0.721087051 |
| H | -2.963764214 | 1.672113121  | -0.959689067 |
| O | 4.620017332  | -1.883432133 | 0.126561010  |
| H | 5.377901390  | -2.234203163 | -0.320298024 |
| H | 3.955745285  | -2.563455183 | 0.170168015  |

Coord\_6

|   |              |              |              |
|---|--------------|--------------|--------------|
| C | -0.693250052 | -0.367202025 | -0.124961011 |
| N | 0.638493045  | -0.524310035 | 0.079762008  |
| C | 1.318107093  | 0.647727045  | 0.078754005  |
| C | -0.615094044 | 1.877631134  | 0.443494033  |
| N | -1.317036097 | 0.810141057  | -0.125130009 |
| N | 0.739893052  | 1.847747134  | 0.095217006  |
| N | -1.430157105 | -1.459982107 | -0.333083026 |
| H | -0.978779072 | -2.336037170 | -0.514943037 |
| H | -2.369353169 | -1.336056098 | -0.662512045 |
| H | -1.093099080 | 2.842149207  | 0.369772027  |
| N | 2.649393193  | 0.605410042  | 0.036685001  |
| H | 3.171665229  | 1.455221104  | 0.146151009  |



|   |              |              |              |
|---|--------------|--------------|--------------|
| H | 3.143572225  | -0.263169017 | 0.035488002  |
| O | 4.170863299  | 3.289749237  | 0.367964025  |
| H | 3.486013253  | 3.950687282  | 0.311852022  |
| H | 4.912034351  | 3.618883262  | -0.122406011 |
| O | -0.129065008 | -4.219921305 | -0.787799056 |
| H | 0.739967053  | -4.106137296 | -0.415516030 |
| H | -0.029578002 | -4.630210334 | -1.635659116 |
| O | -4.042636290 | -0.788980058 | -1.918615139 |
| H | -4.173181301 | 0.155039012  | -1.892191139 |
| H | -4.828991349 | -1.174730084 | -2.279980164 |
| O | 1.673586123  | 4.628572334  | -0.053991002 |
| H | 1.294183096  | 3.754115270  | -0.120671008 |
| H | 0.971993073  | 5.249693379  | 0.071296003  |
| O | 2.080811151  | -3.069964220 | 0.585871040  |
| H | 2.060830149  | -3.234187235 | 1.520924111  |
| H | 1.603890113  | -2.249371161 | 0.444924034  |
| O | -3.766878269 | 1.995438144  | -1.377429101 |
| H | -4.261449305 | 2.465347176  | -0.720024050 |
| H | -2.982198215 | 1.661030117  | -0.952484070 |
| O | 4.622079335  | -1.885428137 | 0.128494010  |
| H | 5.378573387  | -2.230178161 | -0.325406024 |
| H | 3.959586287  | -2.567183184 | 0.168383010  |

Coord\_7

|   |              |              |              |
|---|--------------|--------------|--------------|
| C | -0.700782049 | -0.358527027 | -0.127791009 |
| N | 0.633975046  | -0.513913036 | 0.078744004  |
| C | 1.317401097  | 0.658884049  | 0.078936005  |
| C | -0.618592043 | 1.892650136  | 0.407176027  |
| N | -1.326198097 | 0.814702057  | -0.132733011 |
| N | 0.744547055  | 1.858680132  | 0.092620005  |
| N | -1.431655100 | -1.457285107 | -0.329869025 |
| H | -0.975627070 | -2.331264166 | -0.509774039 |
| H | -2.370615172 | -1.339128099 | -0.662473045 |
| H | -1.092704081 | 2.856479205  | 0.304666022  |
| N | 2.649191190  | 0.607778041  | 0.044528001  |
| H | 3.175912231  | 1.455279102  | 0.150997013  |
| H | 3.138935224  | -0.263193020 | 0.044892006  |
| O | 4.180965303  | 3.289081236  | 0.367941026  |
| H | 3.495444250  | 3.949506286  | 0.312300023  |
| H | 4.920348355  | 3.617460262  | -0.125612010 |
| O | -0.129531007 | -4.216628304 | -0.788683057 |
| H | 0.740707054  | -4.108964298 | -0.417722032 |
| H | -0.034827002 | -4.631146332 | -1.635064120 |
| O | -4.046321290 | -0.797871056 | -1.920199136 |
| H | -4.181297303 | 0.145474011  | -1.889989137 |
| H | -4.834185350 | -1.186414085 | -2.275181162 |
| O | 1.687232122  | 4.631672334  | -0.053118003 |

|   |              |              |              |
|---|--------------|--------------|--------------|
| H | 1.309739092  | 3.755233268  | -0.107370006 |
| H | 0.990798069  | 5.245064380  | 0.126744010  |
| O | 2.081250151  | -3.070096223 | 0.587406040  |
| H | 2.063419148  | -3.234263235 | 1.522547109  |
| H | 1.604284118  | -2.250064160 | 0.447462032  |
| O | -3.783367273 | 1.984208141  | -1.372867101 |
| H | -4.278898311 | 2.456247174  | -0.717759050 |
| H | -2.999575216 | 1.650421119  | -0.945493067 |
| O | 4.624386331  | -1.887974136 | 0.128679010  |
| H | 5.379154386  | -2.226919159 | -0.332484024 |
| H | 3.963542284  | -2.571271184 | 0.165270014  |

Coord\_8

|   |              |              |              |
|---|--------------|--------------|--------------|
| C | -0.707928053 | -0.349990027 | -0.130896009 |
| N | 0.629998046  | -0.503635038 | 0.076810004  |
| C | 1.317345094  | 0.669880050  | 0.076924004  |
| C | -0.620603044 | 1.906827139  | 0.369042027  |
| N | -1.334554097 | 0.819327061  | -0.141031013 |
| N | 0.749615055  | 1.869308133  | 0.087333005  |
| N | -1.432875103 | -1.454799107 | -0.325592024 |
| H | -0.972339070 | -2.326822167 | -0.503153037 |
| H | -2.371766170 | -1.342669099 | -0.660867045 |
| H | -1.090411077 | 2.869259206  | 0.237492019  |
| N | 2.649513189  | 0.609737045  | 0.049497001  |
| H | 3.180923227  | 1.454845103  | 0.152081012  |
| H | 3.134665224  | -0.263680017 | 0.051765002  |
| O | 4.187643303  | 3.291998236  | 0.377656028  |
| H | 3.501231253  | 3.951179285  | 0.316823023  |
| H | 4.927199354  | 3.618203259  | -0.117070010 |
| O | -0.130925008 | -4.213470301 | -0.787654056 |
| H | 0.740817054  | -4.111883298 | -0.418856032 |
| H | -0.041835002 | -4.632421331 | -1.632504119 |
| O | -4.052245292 | -0.804883057 | -1.921665137 |
| H | -4.190653300 | 0.137889012  | -1.887382135 |
| H | -4.842202349 | -1.195415089 | -2.269696165 |
| O | 1.698334123  | 4.634883334  | -0.058866005 |
| H | 1.324999098  | 3.755874271  | -0.098593008 |
| H | 1.010115070  | 5.238114377  | 0.178168011  |
| O | 2.082148149  | -3.070265221 | 0.588509041  |
| H | 2.067255149  | -3.234207233 | 1.523770111  |
| H | 1.605115116  | -2.250777163 | 0.449835032  |
| O | -3.798797272 | 1.974411143  | -1.367826101 |
| H | -4.294430308 | 2.448733175  | -0.714527052 |
| H | -3.015901218 | 1.640289121  | -0.938696065 |
| O | 4.626894334  | -1.890796137 | 0.126430007  |
| H | 5.379532388  | -2.224035159 | -0.342398027 |
| H | 3.967644286  | -2.575529188 | 0.160258012  |

Coord\_9

|   |              |              |              |
|---|--------------|--------------|--------------|
| C | -0.714696050 | -0.341613024 | -0.134331010 |
| N | 0.626582043  | -0.493564033 | 0.073657007  |
| C | 1.318076094  | 0.680548047  | 0.071993004  |
| C | -0.620886042 | 1.920179138  | 0.328528021  |
| N | -1.342026095 | 0.824047057  | -0.150194013 |
| N | 0.755367052  | 1.879522138  | 0.078470006  |
| N | -1.433941104 | -1.452511103 | -0.319906025 |
| H | -0.969141072 | -2.322771167 | -0.494653037 |
| H | -2.372996168 | -1.346669097 | -0.657162048 |
| H | -1.085972079 | 2.880453205  | 0.167563013  |
| N | 2.650489193  | 0.610976045  | 0.050621006  |
| H | 3.186939232  | 1.453552106  | 0.148126010  |
| H | 3.130792224  | -0.264993016 | 0.055244004  |
| O | 4.190106300  | 3.299589236  | 0.400873028  |
| H | 3.502661254  | 3.956508285  | 0.327097026  |
| H | 4.932598354  | 3.621626263  | -0.092183005 |
| O | -0.133540011 | -4.210563303 | -0.784077056 |
| H | 0.740134056  | -4.114955299 | -0.418622030 |
| H | -0.051196004 | -4.634156334 | -1.627354118 |
| O | -4.060896292 | -0.810049060 | -1.922349141 |
| H | -4.201516303 | 0.132303012  | -1.883995136 |
| H | -4.853581347 | -1.201687088 | -2.262796165 |
| O | 1.706841124  | 4.638023334  | -0.073526004 |
| H | 1.340484094  | 3.755847273  | -0.095797005 |
| H | 1.030845076  | 5.228379379  | 0.224121017  |
| O | 2.083689151  | -3.070441220 | 0.588930044  |
| H | 2.072842149  | -3.234009230 | 1.524338109  |
| H | 1.606484114  | -2.251511164 | 0.451972035  |
| O | -3.813069272 | 1.966154142  | -1.362455100 |
| H | -4.307936309 | 2.443158176  | -0.710656052 |
| H | -3.031170220 | 1.630718119  | -0.932067067 |
| O | 4.629498331  | -1.893557136 | 0.120779008  |
| H | 5.379489387  | -2.221049160 | -0.356360025 |
| H | 3.971880286  | -2.579717186 | 0.152541010  |

Coord\_10

|   |              |              |              |
|---|--------------|--------------|--------------|
| C | -0.731234051 | -0.314892023 | -0.147504009 |
| N | 0.612614044  | -0.457730033 | 0.071083004  |
| C | 1.304521092  | 0.719073050  | 0.055041006  |
| C | -0.640272049 | 1.956903140  | 0.246679017  |
| N | -1.362549097 | 0.844774062  | -0.189412011 |
| N | 0.742697052  | 1.915476139  | 0.037107004  |
| N | -1.439955103 | -1.436603104 | -0.312212021 |
| H | -0.967002069 | -2.305846168 | -0.468877036 |
| H | -2.377382169 | -1.345109098 | -0.658476048 |

|   |              |              |              |
|---|--------------|--------------|--------------|
| H | -1.102198082 | 2.909950211  | 0.040022003  |
| N | 2.637389188  | 0.644079045  | 0.049031003  |
| H | 3.175752229  | 1.486971110  | 0.132770011  |
| H | 3.115468224  | -0.232716014 | 0.071452005  |
| O | 4.159411300  | 3.357752239  | 0.421177030  |
| H | 3.469404252  | 4.006867290  | 0.310315021  |
| H | 4.911038355  | 3.669411265  | -0.064659004 |
| O | -0.129604007 | -4.195390304 | -0.731691054 |
| H | 0.743669055  | -4.097722292 | -0.366190027 |
| H | -0.047989005 | -4.634456335 | -1.567161111 |
| O | -4.068419293 | -0.830050060 | -1.948275143 |
| H | -4.213296302 | 0.112064009  | -1.919583136 |
| H | -4.860729352 | -1.228902086 | -2.281075164 |
| O | 1.684555120  | 4.668113337  | -0.157044012 |
| H | 1.332056094  | 3.780991272  | -0.148714010 |
| H | 1.021807072  | 5.244844380  | 0.193636015  |
| O | 2.080368151  | -3.032182218 | 0.634617044  |
| H | 2.068977150  | -3.183119228 | 1.572156116  |
| H | 1.600853117  | -2.217422158 | 0.486030036  |
| O | -3.835279275 | 1.950913139  | -1.418342102 |
| H | -4.334950310 | 2.437948178  | -0.777909056 |
| H | -3.056635218 | 1.621561114  | -0.976900070 |
| O | 4.625461333  | -1.854401136 | 0.159633011  |
| H | 5.376740385  | -2.179487156 | -0.317226023 |
| H | 3.971890287  | -2.544037183 | 0.194507014  |

LIIC path connecting T1-MIN and T<sub>1</sub>/S<sub>0</sub>  
Coord\_1

|   |              |              |              |
|---|--------------|--------------|--------------|
| C | -0.731234051 | -0.314892023 | -0.147504009 |
| N | 0.612614044  | -0.457730033 | 0.071083004  |
| C | 1.304521092  | 0.719073050  | 0.055041006  |
| C | -0.640272049 | 1.956903140  | 0.246679017  |
| N | -1.362549097 | 0.844774062  | -0.189412011 |
| N | 0.742697052  | 1.915476139  | 0.037107004  |
| N | -1.439955103 | -1.436603104 | -0.312212021 |
| H | -0.967002069 | -2.305846168 | -0.468877036 |
| H | -2.377382169 | -1.345109098 | -0.658476048 |
| H | -1.102198082 | 2.909950211  | 0.040022003  |
| N | 2.637389188  | 0.644079045  | 0.049031003  |
| H | 3.175752229  | 1.486971110  | 0.132770011  |
| H | 3.115468224  | -0.232716014 | 0.071452005  |
| O | 4.159411300  | 3.357752239  | 0.421177030  |
| H | 3.469404252  | 4.006867290  | 0.310315021  |
| H | 4.911038355  | 3.669411265  | -0.064659004 |
| O | -0.129604007 | -4.195390304 | -0.731691054 |
| H | 0.743669055  | -4.097722292 | -0.366190027 |
| H | -0.047989005 | -4.634456335 | -1.567161111 |

|   |              |              |              |
|---|--------------|--------------|--------------|
| O | -4.068419293 | -0.830050060 | -1.948275143 |
| H | -4.213296302 | 0.112064009  | -1.919583136 |
| H | -4.860729352 | -1.228902086 | -2.281075164 |
| O | 1.684555120  | 4.668113337  | -0.157044012 |
| H | 1.332056094  | 3.780991272  | -0.148714010 |
| H | 1.021807072  | 5.244844380  | 0.193636015  |
| O | 2.080368151  | -3.032182218 | 0.634617044  |
| H | 2.068977150  | -3.183119228 | 1.572156116  |
| H | 1.600853117  | -2.217422158 | 0.486030036  |
| O | -3.835279275 | 1.950913139  | -1.418342102 |
| H | -4.334950310 | 2.437948178  | -0.777909056 |
| H | -3.056635218 | 1.621561114  | -0.976900070 |
| O | 4.625461333  | -1.854401136 | 0.159633011  |
| H | 5.376740385  | -2.179487156 | -0.317226023 |
| H | 3.971890287  | -2.544037183 | 0.194507014  |

Coord\_2

|   |              |              |              |
|---|--------------|--------------|--------------|
| C | -0.716952049 | -0.329212025 | -0.165263013 |
| N | 0.617977044  | -0.464837032 | 0.065272003  |
| C | 1.300698093  | 0.723232050  | 0.053610005  |
| C | -0.645609045 | 1.946529138  | 0.280494020  |
| N | -1.344853098 | 0.843651058  | -0.238152019 |
| N | 0.733772054  | 1.917484139  | 0.059227005  |
| N | -1.442006104 | -1.442764103 | -0.312638025 |
| H | -0.977627069 | -2.321634166 | -0.444483034 |
| H | -2.376244174 | -1.354609100 | -0.671879049 |
| H | -1.119216078 | 2.902367207  | 0.117544010  |
| N | 2.632170188  | 0.653161050  | 0.033549001  |
| H | 3.169073229  | 1.496848108  | 0.119233011  |
| H | 3.112239222  | -0.222809017 | 0.048142006  |
| O | 4.164156300  | 3.367462245  | 0.409046028  |
| H | 3.468440250  | 4.009046288  | 0.292739023  |
| H | 4.916965352  | 3.688731267  | -0.068964004 |
| O | -0.139601012 | -4.194157300 | -0.717344053 |
| H | 0.735568055  | -4.092131297 | -0.356944025 |
| H | -0.059547003 | -4.621856334 | -1.558837111 |
| O | -4.076510291 | -0.832376058 | -1.933974138 |
| H | -4.223179307 | 0.110188007  | -1.912136136 |
| H | -4.869768350 | -1.233724087 | -2.260269164 |
| O | 1.675912121  | 4.665762334  | -0.156434013 |
| H | 1.322547097  | 3.778341274  | -0.135763011 |
| H | 1.034992074  | 5.240510376  | 0.235891019  |
| O | 2.080220150  | -3.033943220 | 0.635828045  |
| H | 2.068760150  | -3.183957228 | 1.573450113  |
| H | 1.603902115  | -2.216970161 | 0.486656037  |
| O | -3.849035275 | 1.960848140  | -1.457398103 |
| H | -4.321189310 | 2.477109178  | -0.818948059 |

|   |              |              |              |
|---|--------------|--------------|--------------|
| H | -3.046042217 | 1.664373120  | -1.040602072 |
| O | 4.618599333  | -1.844177135 | 0.157788014  |
| H | 5.373826386  | -2.173626158 | -0.309730021 |
| H | 3.967009284  | -2.535403185 | 0.198326012  |

Coord\_3

|   |              |              |              |
|---|--------------|--------------|--------------|
| C | -0.701978053 | -0.344753024 | -0.181322013 |
| N | 0.623730047  | -0.473184036 | 0.060294006  |
| C | 1.296869094  | 0.726191050  | 0.052958006  |
| C | -0.651659049 | 1.929928139  | 0.317573020  |
| N | -1.324032095 | 0.841145060  | -0.284744023 |
| N | 0.723882054  | 1.917092140  | 0.083129004  |
| N | -1.443561102 | -1.449094105 | -0.311609024 |
| H | -0.988872070 | -2.337051169 | -0.419057030 |
| H | -2.374111171 | -1.361879095 | -0.683389051 |
| H | -1.139061082 | 2.885439208  | 0.199173014  |
| N | 2.626760192  | 0.661652048  | 0.017254999  |
| H | 3.162025228  | 1.506273109  | 0.104475009  |
| H | 3.109095226  | -0.213276016 | 0.023172000  |
| O | 4.164481299  | 3.375942242  | 0.393594026  |
| H | 3.462925249  | 4.010080290  | 0.273174017  |
| H | 4.917523353  | 3.706506267  | -0.077885006 |
| O | -0.148456010 | -4.195069300 | -0.702198053 |
| H | 0.728488055  | -4.088046292 | -0.347005023 |
| H | -0.069933007 | -4.611443332 | -1.549494111 |
| O | -4.080012296 | -0.830584058 | -1.920675136 |
| H | -4.226764302 | 0.112584010  | -1.904695137 |
| H | -4.874383353 | -1.232847087 | -2.242120162 |
| O | 1.662265121  | 4.661844338  | -0.155867010 |
| H | 1.309599093  | 3.773781269  | -0.122408011 |
| H | 1.045199078  | 5.233252376  | 0.277647020  |
| O | 2.080603148  | -3.036287221 | 0.637184045  |
| H | 2.069382150  | -3.185211230 | 1.574922115  |
| H | 1.607423118  | -2.217162158 | 0.487448035  |
| O | -3.855011279 | 1.973119141  | -1.493796110 |
| H | -4.300560308 | 2.516929184  | -0.859084063 |
| H | -3.029198220 | 1.707954121  | -1.104538077 |
| O | 4.611505331  | -1.833423132 | 0.155397011  |
| H | 5.370791385  | -2.166644156 | -0.302759021 |
| H | 3.962256288  | -2.526542181 | 0.201741016  |

Coord\_4

|   |              |              |              |
|---|--------------|--------------|--------------|
| C | -0.686385052 | -0.361688025 | -0.195594013 |
| N | 0.629846045  | -0.482907033 | 0.056230004  |
| C | 1.292922093  | 0.727878051  | 0.053072001  |
| C | -0.658337049 | 1.906563138  | 0.357714025  |
| N | -1.299900094 | 0.837194059  | -0.329093024 |

|   |              |              |              |
|---|--------------|--------------|--------------|
| N | 0.712909050  | 1.914138135  | 0.108715010  |
| N | -1.444649106 | -1.455762103 | -0.309193022 |
| H | -1.000755073 | -2.352287171 | -0.392713031 |
| H | -2.370918169 | -1.367126100 | -0.693320052 |
| H | -1.161733084 | 2.858365204  | 0.284633023  |
| N | 2.620990191  | 0.669642047  | 0.000092998  |
| H | 3.154355227  | 1.515401110  | 0.088346004  |
| H | 3.105939224  | -0.203961015 | -0.003461999 |
| O | 4.160108300  | 3.383260244  | 0.374964029  |
| H | 3.452532250  | 4.009965289  | 0.251568017  |
| H | 4.912528354  | 3.722787268  | -0.091227009 |
| O | -0.156058011 | -4.198246300 | -0.686088051 |
| H | 0.722533054  | -4.085566292 | -0.336233022 |
| H | -0.079070003 | -4.603392329 | -1.538952111 |
| O | -4.078833295 | -0.824342058 | -1.908710137 |
| H | -4.223807302 | 0.119587010  | -1.897299138 |
| H | -4.874573349 | -1.225728087 | -2.227136159 |
| O | 1.643352120  | 4.656191333  | -0.155626012 |
| H | 1.292997093  | 3.767142270  | -0.108881008 |
| H | 1.052207078  | 5.223043378  | 0.318299025  |
| O | 2.081632149  | -3.039241221 | 0.638745044  |
| H | 2.071005148  | -3.186834227 | 1.576643115  |
| H | 1.611517119  | -2.218037157 | 0.488422033  |
| O | -3.852723275 | 1.988124142  | -1.527147109 |
| H | -4.272440306 | 2.557351182  | -0.897117064 |
| H | -3.005553215 | 1.752443127  | -1.168624083 |
| O | 4.604277330  | -1.822239129 | 0.152342012  |
| H | 5.367713389  | -2.158694157 | -0.296437020 |
| H | 3.957721286  | -2.517530181 | 0.204712012  |

Coord\_5

|   |              |              |              |
|---|--------------|--------------|--------------|
| C | -0.670253046 | -0.380236026 | -0.207983016 |
| N | 0.636287048  | -0.494175037 | 0.053171005  |
| C | 1.288722092  | 0.728195055  | 0.053936005  |
| C | -0.665526049 | 1.875832137  | 0.400626030  |
| N | -1.272245090 | 0.831691060  | -0.371096029 |
| N | 0.700709049  | 1.908430138  | 0.135841012  |
| N | -1.445325103 | -1.462960105 | -0.305503022 |
| H | -1.013347073 | -2.367564169 | -0.365634025 |
| H | -2.366578169 | -1.370523100 | -0.702028050 |
| H | -1.187194087 | 2.820233204  | 0.373520026  |
| N | 2.614658188  | 0.677202048  | -0.017976003 |
| H | 3.145756224  | 1.524382110  | 0.070692006  |
| H | 3.102645222  | -0.194719013 | -0.031723001 |
| O | 4.150701301  | 3.389469245  | 0.353340026  |
| H | 3.436885246  | 4.008665291  | 0.227864014  |
| H | 4.901738350  | 3.737596267  | -0.108740008 |

|   |              |              |              |
|---|--------------|--------------|--------------|
| O | -0.162270013 | -4.203835301 | -0.668825051 |
| H | 0.717829049  | -4.084810293 | -0.324464025 |
| H | -0.086853005 | -4.597913328 | -1.527001109 |
| O | -4.072797293 | -0.813305061 | -1.898444135 |
| H | -4.213972305 | 0.131528011  | -1.889955137 |
| H | -4.870242350 | -1.211793087 | -2.215867160 |
| O | 1.618866115  | 4.648570334  | -0.156093011 |
| H | 1.272487093  | 3.758203270  | -0.095503005 |
| H | 1.055707077  | 5.209834373  | 0.357093025  |
| O | 2.083440152  | -3.042837218 | 0.640577045  |
| H | 2.073817148  | -3.188773228 | 1.578694111  |
| H | 1.616300119  | -2.219641157 | 0.489594034  |
| O | -3.841571277 | 2.006242145  | -1.556920113 |
| H | -4.236046304 | 2.598240189  | -0.931571069 |
| H | -2.974442212 | 1.798013130  | -1.232757090 |
| O | 4.597021331  | -1.810730133 | 0.148486009  |
| H | 5.364679388  | -2.149935157 | -0.290906022 |
| H | 3.953505283  | -2.508444181 | 0.207192017  |

Coord\_6

|   |              |              |              |
|---|--------------|--------------|--------------|
| C | -0.653678045 | -0.400663030 | -0.218390017 |
| N | 0.643002048  | -0.507202037 | 0.051216002  |
| C | 1.284104095  | 0.727003051  | 0.055521002  |
| C | -0.673071047 | 1.837066131  | 0.445916030  |
| N | -1.240841087 | 0.824462059  | -0.410656029 |
| N | 0.687101049  | 1.899735137  | 0.164308012  |
| N | -1.445663105 | -1.470923106 | -0.300693023 |
| H | -1.026765072 | -2.383152170 | -0.338070024 |
| H | -2.360971171 | -1.372233099 | -0.709902054 |
| H | -1.215358086 | 2.770017199  | 0.465272032  |
| N | 2.607519185  | 0.684376051  | -0.036990003 |
| H | 3.135863223  | 1.533345108  | 0.051349005  |
| H | 3.099059221  | -0.185427015 | -0.061540007 |
| O | 4.135872300  | 3.394588247  | 0.328954025  |
| H | 3.415556244  | 4.006090288  | 0.202000016  |
| H | 4.884858353  | 3.750920272  | -0.130117007 |
| O | -0.166930011 | -4.212019302 | -0.650175045 |
| H | 0.714531053  | -4.085923296 | -0.311501024 |
| H | -0.093151008 | -4.595267331 | -1.513385108 |
| O | -4.061616291 | -0.797135055 | -1.890273136 |
| H | -4.196792301 | 0.148706009  | -1.882633134 |
| H | -4.861165352 | -1.190448088 | -2.208895160 |
| O | 1.588448113  | 4.638670333  | -0.157767011 |
| H | 1.247765091  | 3.746678271  | -0.082689004 |
| H | 1.055273078  | 5.193549371  | 0.393132028  |
| O | 2.086175151  | -3.047117220 | 0.642766045  |
| H | 2.078028150  | -3.190963228 | 1.581174116  |



|   |              |              |              |
|---|--------------|--------------|--------------|
| H | 1.621899116  | -2.222034160 | 0.490983034  |
| O | -3.820793276 | 2.027804144  | -1.582403115 |
| H | -4.190366301 | 2.639327188  | -0.960630071 |
| H | -2.935059212 | 1.844869135  | -1.296816091 |
| O | 4.589846328  | -1.799005131 | 0.143671009  |
| H | 5.361779386  | -2.140530153 | -0.286328020 |
| H | 3.949720285  | -2.499366182 | 0.209126017  |

Coord\_7

|   |              |              |              |
|---|--------------|--------------|--------------|
| C | -0.636776044 | -0.423297031 | -0.226723018 |
| N | 0.649919045  | -0.522249038 | 0.050457003  |
| C | 1.278871093  | 0.724120051  | 0.057764004  |
| C | -0.680780048 | 1.789523127  | 0.493078037  |
| N | -1.205444088 | 0.815253057  | -0.447685032 |
| N | 0.671853050  | 1.887771138  | 0.193842013  |
| N | -1.445748107 | -1.479942106 | -0.294966023 |
| H | -1.041162074 | -2.399382174 | -0.310349021 |
| H | -2.353929171 | -1.372417099 | -0.717374052 |
| H | -1.246086091 | 2.706576197  | 0.559154039  |
| N | 2.599285187  | 0.691170052  | -0.057002005 |
| H | 3.124245227  | 1.542391113  | 0.030118001  |
| H | 3.094991224  | -0.175998013 | -0.092833009 |
| O | 4.115168298  | 3.398592245  | 0.302089024  |
| H | 3.388057241  | 4.002086290  | 0.173905012  |
| H | 4.861538348  | 3.762692270  | -0.154981009 |
| O | -0.169844010 | -4.223034301 | -0.629851046 |
| H | 0.712816053  | -4.089091295 | -0.297098020 |
| H | -0.097799010 | -4.595792333 | -1.497788106 |
| O | -4.044861290 | -0.775510057 | -1.884634138 |
| H | -4.171650301 | 0.171375010  | -1.875257133 |
| H | -4.846942348 | -1.161096081 | -2.206820161 |
| O | 1.551676110  | 4.626084333  | -0.161280012 |
| H | 1.218466087  | 3.732202268  | -0.070968003 |
| H | 1.050343077  | 5.174073373  | 0.425356033  |
| O | 2.089998150  | -3.052128221 | 0.645417048  |
| H | 2.083870150  | -3.193321231 | 1.584205117  |
| H | 1.628448118  | -2.225289161 | 0.492611038  |
| O | -3.789374271 | 2.053054148  | -1.602663115 |
| H | -4.134070298 | 2.680125193  | -0.982070073 |
| H | -2.886420207 | 1.893259135  | -1.360659098 |
| O | 4.582858331  | -1.787179131 | 0.137720009  |
| H | 5.359103384  | -2.130649155 | -0.282872021 |
| H | 3.946478286  | -2.490382182 | 0.210461015  |

Coord\_8

|   |              |              |              |
|---|--------------|--------------|--------------|
| C | -0.619683042 | -0.448537034 | -0.232920017 |
| N | 0.656944048  | -0.539639041 | 0.050963002  |

|   |              |              |              |
|---|--------------|--------------|--------------|
| C | 1.272780093  | 0.719305052  | 0.060546005  |
| C | -0.688413049 | 1.732385123  | 0.541467041  |
| N | -1.165799086 | 0.803710056  | -0.482129036 |
| N | 0.654667046  | 1.872194134  | 0.224067014  |
| N | -1.445686103 | -1.490368105 | -0.288599021 |
| H | -1.056737078 | -2.416652175 | -0.282893019 |
| H | -2.345222168 | -1.371241098 | -0.724936053 |
| H | -1.279177089 | 2.628639189  | 0.654232046  |
| N | 2.589605186  | 0.697536049  | -0.078116008 |
| H | 3.110386223  | 1.551578111  | 0.006731002  |
| H | 3.090203223  | -0.166391012 | -0.125542011 |
| O | 4.088068295  | 3.401398244  | 0.273069018  |
| H | 3.353829242  | 3.996411287  | 0.143490009  |
| H | 4.831372350  | 3.772785273  | -0.182890013 |
| O | -0.170784014 | -4.237187306 | -0.607488042 |
| H | 0.712891053  | -4.094548293 | -0.280936021 |
| H | -0.100587006 | -4.599930330 | -1.479805108 |
| O | -4.021931288 | -0.748127056 | -1.882013134 |
| H | -4.137765299 | 0.199732015  | -1.867722136 |
| H | -4.826960345 | -1.123155083 | -2.210222157 |
| O | 1.508042106  | 4.610287334  | -0.167418013 |
| H | 1.184140084  | 3.714315267  | -0.061008004 |
| H | 1.040177074  | 5.151229373  | 0.452539032  |
| O | 2.095071150  | -3.057925220 | 0.648678045  |
| H | 2.091579152  | -3.195724230 | 1.587953115  |
| H | 1.636075118  | -2.229493162 | 0.494502037  |
| O | -3.745934269 | 2.082100148  | -1.616493115 |
| H | -4.065339291 | 2.719802194  | -0.993175069 |
| H | -2.827316205 | 1.943474140  | -1.424119103 |
| O | 4.576148332  | -1.775368128 | 0.130440012  |
| H | 5.356732384  | -2.120471155 | -0.280711020 |
| H | 3.943888286  | -2.481577180 | 0.211154015  |

Coord\_9

|   |              |              |              |
|---|--------------|--------------|--------------|
| C | -0.602567042 | -0.476858034 | -0.236978018 |
| N | 0.663945047  | -0.559758042 | 0.052749002  |
| C | 1.265529090  | 0.712255051  | 0.063647005  |
| C | -0.695682050 | 1.664746121  | 0.590274043  |
| N | -1.121647082 | 0.789361055  | -0.513991037 |
| N | 0.635154047  | 1.852587132  | 0.254464019  |
| N | -1.445610102 | -1.502597110 | -0.281979019 |
| H | -1.073767076 | -2.435413175 | -0.256264021 |
| H | -2.334561167 | -1.368845100 | -0.733172052 |
| H | -1.314345093 | 2.534804183  | 0.749338051  |
| N | 2.578054183  | 0.703364053  | -0.100530009 |
| H | 3.093663222  | 1.560907114  | -0.019209002 |
| H | 3.084402223  | -0.156621014 | -0.159672012 |

|   |              |              |              |
|---|--------------|--------------|--------------|
| O | 4.053971293  | 3.402861245  | 0.242248015  |
| H | 3.312228237  | 3.988732285  | 0.110627007  |
| H | 4.793883343  | 3.781016271  | -0.213337014 |
| O | -0.169479010 | -4.254882305 | -0.582617044 |
| H | 0.714994051  | -4.102595295 | -0.262596018 |
| H | -0.101248007 | -4.608268332 | -1.458911105 |
| O | -3.992035287 | -0.714689049 | -1.882978136 |
| H | -4.094221293 | 0.233923015  | -1.859913136 |
| H | -4.800352345 | -1.076111078 | -2.219605157 |
| O | 1.456932104  | 4.590610328  | -0.177161013 |
| H | 1.144233081  | 3.692441265  | -0.053647005 |
| H | 1.023821073  | 5.124752371  | 0.473260036  |
| O | 2.101556154  | -3.064556219 | 0.652750048  |
| H | 2.101381149  | -3.197996231 | 1.592639117  |
| H | 1.644897117  | -2.234750162 | 0.496687036  |
| O | -3.688550267 | 2.114843154  | -1.622367115 |
| H | -3.981613284 | 2.756982198  | -0.990665071 |
| H | -2.756257199 | 1.995857142  | -1.486998108 |
| O | 4.569778329  | -1.763685127 | 0.121628009  |
| H | 5.354727384  | -2.110176149 | -0.279997022 |
| H | 3.942040283  | -2.473032179 | 0.211191015  |

Coord\_10

|   |              |              |              |
|---|--------------|--------------|--------------|
| C | -0.583986042 | -0.586611041 | -0.236456017 |
| N | 0.675116047  | -0.669769050 | 0.043966004  |
| C | 1.257893088  | 0.615953047  | 0.105044007  |
| C | -0.698250052 | 1.467863106  | 0.731137053  |
| N | -1.077011076 | 0.704244048  | -0.481340033 |
| N | 0.613009043  | 1.729532123  | 0.376378027  |
| N | -1.441772102 | -1.594841114 | -0.308966021 |
| H | -1.085941080 | -2.533945180 | -0.307946022 |
| H | -2.322106166 | -1.425755102 | -0.761579054 |
| H | -1.347548097 | 2.294313163  | 0.977081070  |
| N | 2.563516187  | 0.633873047  | -0.097116006 |
| H | 3.071164219  | 1.493141110  | 0.011731002  |
| H | 3.078175220  | -0.216028018 | -0.208959014 |
| O | 4.007537286  | 3.315622237  | 0.340353027  |
| H | 3.255239234  | 3.894499279  | 0.236820017  |
| H | 4.738871341  | 3.721378270  | -0.104818006 |
| O | -0.157063009 | -4.336186315 | -0.717192052 |
| H | 0.730230054  | -4.184146304 | -0.405034029 |
| H | -0.097712008 | -4.642859337 | -1.611518113 |
| O | -3.966440286 | -0.691632050 | -1.862146132 |
| H | -4.054438292 | 0.254635017  | -1.784221131 |
| H | -4.780329346 | -1.023570074 | -2.216650157 |
| O | 1.386562097  | 4.487513323  | 0.011574001  |
| H | 1.090586081  | 3.581021260  | 0.117143010  |

|   |              |              |              |
|---|--------------|--------------|--------------|
| H | 0.993620071  | 4.984803361  | 0.714637052  |
| O | 2.125568153  | -3.178070226 | 0.526254037  |
| H | 2.138005152  | -3.346116240 | 1.460483105  |
| H | 1.667466119  | -2.342475167 | 0.407295028  |
| O | -3.631619262 | 2.120906155  | -1.474178107 |
| H | -3.892265278 | 2.730300198  | -0.797359056 |
| H | -2.687682193 | 2.020712147  | -1.417312100 |
| O | 4.571457329  | -1.828783131 | 0.015413002  |
| H | 5.358238385  | -2.157029154 | -0.397885029 |
| H | 3.951416282  | -2.546802181 | 0.089625004  |

LIIC path connecting T<sub>1</sub>/S<sub>0</sub> and S0-MIN  
Coord\_1

|   |              |              |              |
|---|--------------|--------------|--------------|
| C | -0.583986042 | -0.586611041 | -0.236456017 |
| N | 0.675116047  | -0.669769050 | 0.043966004  |
| C | 1.257893088  | 0.615953047  | 0.105044007  |
| C | -0.698250052 | 1.467863106  | 0.731137053  |
| N | -1.077011076 | 0.704244048  | -0.481340033 |
| N | 0.613009043  | 1.729532123  | 0.376378027  |
| N | -1.441772102 | -1.594841114 | -0.308966021 |
| H | -1.085941080 | -2.533945180 | -0.307946022 |
| H | -2.322106166 | -1.425755102 | -0.761579054 |
| H | -1.347548097 | 2.294313163  | 0.977081070  |
| N | 2.563516187  | 0.633873047  | -0.097116006 |
| H | 3.071164219  | 1.493141110  | 0.011731002  |
| H | 3.078175220  | -0.216028018 | -0.208959014 |
| O | 4.007537286  | 3.315622237  | 0.340353027  |
| H | 3.255239234  | 3.894499279  | 0.236820017  |
| H | 4.738871341  | 3.721378270  | -0.104818006 |
| O | -0.157063009 | -4.336186315 | -0.717192052 |
| H | 0.730230054  | -4.184146304 | -0.405034029 |
| H | -0.097712008 | -4.642859337 | -1.611518113 |
| O | -3.966440286 | -0.691632050 | -1.862146132 |
| H | -4.054438292 | 0.254635017  | -1.784221131 |
| H | -4.780329346 | -1.023570074 | -2.216650157 |
| O | 1.386562097  | 4.487513323  | 0.011574001  |
| H | 1.090586081  | 3.581021260  | 0.117143010  |
| H | 0.993620071  | 4.984803361  | 0.714637052  |
| O | 2.125568153  | -3.178070226 | 0.526254037  |
| H | 2.138005152  | -3.346116240 | 1.460483105  |
| H | 1.667466119  | -2.342475167 | 0.407295028  |
| O | -3.631619262 | 2.120906155  | -1.474178107 |
| H | -3.892265278 | 2.730300198  | -0.797359056 |
| H | -2.687682193 | 2.020712147  | -1.417312100 |
| O | 4.571457329  | -1.828783131 | 0.015413002  |
| H | 5.358238385  | -2.157029154 | -0.397885029 |
| H | 3.951416282  | -2.546802181 | 0.089625004  |

Coord\_2

|   |              |              |              |
|---|--------------|--------------|--------------|
| C | -0.615045042 | -0.599601041 | -0.212818013 |
| N | 0.651874048  | -0.666878049 | 0.044900002  |
| C | 1.235008088  | 0.608857044  | 0.108188008  |
| C | -0.729912055 | 1.525845111  | 0.663268049  |
| N | -1.170256087 | 0.660571050  | -0.435357033 |
| N | 0.595734041  | 1.735027126  | 0.353508024  |
| N | -1.452217103 | -1.628282115 | -0.276817022 |
| H | -1.073487078 | -2.557821186 | -0.301996021 |
| H | -2.342075167 | -1.474226108 | -0.715368052 |
| H | -1.364043097 | 2.372923168  | 0.877698063  |
| N | 2.546925183  | 0.628404048  | -0.060709003 |
| H | 3.048699221  | 1.490664105  | 0.050071005  |
| H | 3.066018219  | -0.219367015 | -0.165291011 |
| O | 4.016363291  | 3.321250238  | 0.342961024  |
| H | 3.265208235  | 3.904085283  | 0.258094016  |
| H | 4.742018342  | 3.731255268  | -0.107816007 |
| O | -0.157212009 | -4.334629311 | -0.733325053 |
| H | 0.731554055  | -4.184386301 | -0.424792031 |
| H | -0.102338006 | -4.643913336 | -1.627062118 |
| O | -3.973866288 | -0.687782048 | -1.882309134 |
| H | -4.067158295 | 0.257262017  | -1.799625131 |
| H | -4.785091344 | -1.022031073 | -2.240374163 |
| O | 1.395377100  | 4.493977323  | 0.042433004  |
| H | 1.100923077  | 3.585357259  | 0.123383010  |
| H | 0.967487070  | 4.985837358  | 0.728692053  |
| O | 2.124998155  | -3.172953230 | 0.508996037  |
| H | 2.141917153  | -3.344953241 | 1.442509103  |
| H | 1.658760121  | -2.341433169 | 0.395177028  |
| O | -3.645665261 | 2.112237152  | -1.436288105 |
| H | -3.937467281 | 2.694040195  | -0.758138052 |
| H | -2.725906195 | 1.972654143  | -1.339238099 |
| O | 4.584255332  | -1.839472130 | 0.011272999  |
| H | 5.361640387  | -2.162989155 | -0.423064029 |
| H | 3.957328287  | -2.552669185 | 0.071272005  |

Coord\_3

|   |              |              |              |
|---|--------------|--------------|--------------|
| C | -0.644111044 | -0.607012041 | -0.187086013 |
| N | 0.630646045  | -0.662810046 | 0.046932005  |
| C | 1.216203087  | 0.602103044  | 0.110925008  |
| C | -0.754222056 | 1.575045111  | 0.591476043  |
| N | -1.248969091 | 0.625429045  | -0.385328029 |
| N | 0.581349040  | 1.739700126  | 0.329337022  |
| N | -1.463127108 | -1.653371118 | -0.242851018 |
| H | -1.065362075 | -2.573550186 | -0.294796020 |
| H | -2.361735171 | -1.511738108 | -0.666982048 |

|   |              |              |              |
|---|--------------|--------------|--------------|
| H | -1.374270098 | 2.440099177  | 0.774296056  |
| N | 2.533323185  | 0.622414047  | -0.026780004 |
| H | 3.030142219  | 1.487340105  | 0.083743003  |
| H | 3.056117217  | -0.223651017 | -0.123751010 |
| O | 4.022590289  | 3.327653241  | 0.355184024  |
| H | 3.273020235  | 3.913739280  | 0.282977021  |
| H | 4.743490339  | 3.738272269  | -0.102819007 |
| O | -0.157394009 | -4.335226313 | -0.745824055 |
| H | 0.732989052  | -4.185923302 | -0.441855034 |
| H | -0.107570008 | -4.648054333 | -1.638640120 |
| O | -3.981290285 | -0.683932050 | -1.902471137 |
| H | -4.079877293 | 0.259889017  | -1.815028131 |
| H | -4.789851346 | -1.020493072 | -2.264097163 |
| O | 1.402753101  | 4.499234324  | 0.067307007  |
| H | 1.109108078  | 3.589642261  | 0.129214009  |
| H | 0.939785070  | 4.990484360  | 0.730807053  |
| O | 2.124801153  | -3.167519226 | 0.492236036  |
| H | 2.146559154  | -3.343014240 | 1.425059102  |
| H | 1.650571119  | -2.340186168 | 0.383322029  |
| O | -3.659711266 | 2.103567149  | -1.398398099 |
| H | -3.982668289 | 2.657778191  | -0.718917054 |
| H | -2.764130197 | 1.924595138  | -1.261163092 |
| O | 4.596172330  | -1.849465135 | 0.003896999  |
| H | 5.363830387  | -2.167279158 | -0.451485033 |
| H | 3.962737283  | -2.557732184 | 0.050890002  |

Coord\_4

|   |              |              |              |
|---|--------------|--------------|--------------|
| C | -0.671525051 | -0.609516045 | -0.159707011 |
| N | 0.6111110043 | -0.657718049 | 0.049935001  |
| C | 1.200956088  | 0.595613045  | 0.113608011  |
| C | -0.771859057 | 1.615673118  | 0.517374035  |
| N | -1.314780092 | 0.598873041  | -0.332133026 |
| N | 0.569644042  | 1.743584128  | 0.304445022  |
| N | -1.474279105 | -1.671465122 | -0.207747013 |
| H | -1.060672077 | -2.582395188 | -0.286934023 |
| H | -2.380965170 | -1.540179109 | -0.617283044 |
| H | -1.378592101 | 2.496394180  | 0.668947047  |
| N | 2.522367184  | 0.615993042  | 0.005244999  |
| H | 3.015120216  | 1.483240108  | 0.113761006  |
| H | 3.048205219  | -0.228718017 | -0.083981006 |
| O | 4.026204289  | 3.333985238  | 0.374169025  |
| H | 3.278635235  | 3.923187285  | 0.310457021  |
| H | 4.743012344  | 3.742290270  | -0.092415007 |
| O | -0.157378012 | -4.337686310 | -0.755736053 |
| H | 0.734657055  | -4.188570300 | -0.456934034 |
| H | -0.112863008 | -4.654808334 | -1.647329120 |
| O | -3.988714287 | -0.680081048 | -1.922633139 |

|   |              |              |              |
|---|--------------|--------------|--------------|
| H | -4.092595295 | 0.262515017  | -1.830431132 |
| H | -4.794611343 | -1.018954071 | -2.287821164 |
| O | 1.408558101  | 4.503793323  | 0.088028006  |
| H | 1.115249080  | 3.593888257  | 0.134740011  |
| H | 0.911017063  | 4.997506362  | 0.724031054  |
| O | 2.124792152  | -3.161818230 | 0.475948034  |
| H | 2.151503157  | -3.340477243 | 1.408091102  |
| H | 1.642706117  | -2.338772169 | 0.371717029  |
| O | -3.673756265 | 2.094897151  | -1.360508098 |
| H | -4.027869292 | 2.621517188  | -0.679696050 |
| H | -2.802353199 | 1.876536134  | -1.183088084 |
| O | 4.607322333  | -1.858818136 | -0.005630001 |
| H | 5.365022385  | -2.170006157 | -0.481821034 |
| H | 3.967651287  | -2.562041184 | 0.029226004  |

Coord\_5

|   |              |              |              |
|---|--------------|--------------|--------------|
| C | -0.697117052 | -0.607592046 | -0.131102007 |
| N | 0.593441042  | -0.651708045 | 0.053742003  |
| C | 1.189347087  | 0.589292044  | 0.116445009  |
| C | -0.782875056 | 1.648008118  | 0.442384031  |
| N | -1.368629101 | 0.580865044  | -0.276505019 |
| N | 0.560989041  | 1.746674126  | 0.279294021  |
| N | -1.485005105 | -1.683582122 | -0.172165013 |
| H | -1.058187077 | -2.585244189 | -0.279039021 |
| H | -2.399172175 | -1.561004113 | -0.567063043 |
| H | -1.376731101 | 2.542443184  | 0.563498040  |
| N | 2.514279181  | 0.609057042  | 0.035713003  |
| H | 3.003897218  | 1.478221106  | 0.140816008  |
| H | 3.042499217  | -0.234639018 | -0.045847001 |
| O | 4.027686292  | 3.339382243  | 0.397520029  |
| H | 3.282625236  | 3.931988286  | 0.339363026  |
| H | 4.740848342  | 3.742657270  | -0.079038004 |
| O | -0.156514009 | -4.341852311 | -0.763835053 |
| H | 0.737113052  | -4.192225300 | -0.470506034 |
| H | -0.117282009 | -4.663925338 | -1.653908122 |
| O | -3.996138290 | -0.676231050 | -1.942795142 |
| H | -4.105314298 | 0.265142017  | -1.845835132 |
| H | -4.799372345 | -1.017415076 | -2.311544169 |
| O | 1.413385102  | 4.507867327  | 0.105518007  |
| H | 1.119919080  | 3.598100260  | 0.140004012  |
| H | 0.882467061  | 5.006154362  | 0.710096050  |
| O | 2.125227152  | -3.155871225 | 0.460185035  |
| H | 2.156781155  | -3.337418238 | 1.391659101  |
| H | 1.635419118  | -2.337210171 | 0.360358028  |
| O | -3.687801264 | 2.086226148  | -1.322618097 |
| H | -4.073070295 | 2.585255185  | -0.640474046 |
| H | -2.840577207 | 1.828477134  | -1.105013077 |

|   |             |              |              |
|---|-------------|--------------|--------------|
| O | 4.618188331 | -1.867570135 | -0.016374004 |
| H | 5.365810388 | -2.171270155 | -0.512909039 |
| H | 3.972491285 | -2.565635187 | 0.006964999  |

Coord\_6

|   |              |              |              |
|---|--------------|--------------|--------------|
| C | -0.720250051 | -0.601567046 | -0.101665009 |
| N | 0.578269044  | -0.644839044 | 0.058161004  |
| C | 1.182000085  | 0.583028040  | 0.119562006  |
| C | -0.786761059 | 1.672386118  | 0.367788025  |
| N | -1.410802104 | 0.571303039  | -0.219029014 |
| N | 0.556273040  | 1.748940127  | 0.254277018  |
| N | -1.494195109 | -1.690508121 | -0.136757012 |
| H | -1.056294078 | -2.582709186 | -0.271782022 |
| H | -2.415312176 | -1.575384113 | -0.517079035 |
| H | -1.367830101 | 2.578949186  | 0.459624033  |
| N | 2.509799182  | 0.601365043  | 0.064816005  |
| H | 2.997326218  | 1.471944106  | 0.165397011  |
| H | 3.039658217  | -0.241694020 | -0.009355002 |
| O | 4.028028289  | 3.342833240  | 0.423089032  |
| H | 3.286172237  | 3.939516282  | 0.368411026  |
| H | 4.737789343  | 3.738250272  | -0.065050002 |
| O | -0.153772013 | -4.347647315 | -0.770712055 |
| H | 0.741301056  | -4.196834302 | -0.482909033 |
| H | -0.119540008 | -4.675278338 | -1.658966119 |
| O | -4.003562287 | -0.672380048 | -1.962957139 |
| H | -4.118033295 | 0.267769017  | -1.861238133 |
| H | -4.804132348 | -1.015876075 | -2.335267169 |
| O | 1.418487101  | 4.511516326  | 0.120164009  |
| H | 1.124145079  | 3.602279257  | 0.145002012  |
| H | 0.856117061  | 5.016005361  | 0.690044048  |
| O | 2.126781155  | -3.149680227 | 0.445037035  |
| H | 2.162854157  | -3.333860241 | 1.375861101  |
| H | 1.629377115  | -2.335506167 | 0.349243025  |
| O | -3.701847269 | 2.077556150  | -1.284728090 |
| H | -4.118271298 | 2.548994182  | -0.601253042 |
| H | -2.878800209 | 1.780417129  | -1.026938076 |
| O | 4.629614332  | -1.875740135 | -0.027512005 |
| H | 5.367165389  | -2.171153154 | -0.543723040 |
| H | 3.978067289  | -2.568537184 | -0.015266002 |

Coord\_7

|   |              |              |              |
|---|--------------|--------------|--------------|
| C | -0.739893052 | -0.591641040 | -0.071764007 |
| N | 0.566621043  | -0.637132048 | 0.062995006  |
| C | 1.180011083  | 0.576696043  | 0.123029011  |
| C | -0.782519058 | 1.689177124  | 0.294748023  |
| N | -1.441001106 | 0.570042041  | -0.160159013 |
| N | 0.556839042  | 1.750336128  | 0.229739016  |



|   |              |              |              |
|---|--------------|--------------|--------------|
| N | -1.500309107 | -1.692874120 | -0.102185005 |
| H | -1.052951074 | -2.575185185 | -0.265887019 |
| H | -2.427899176 | -1.584349116 | -0.468081032 |
| H | -1.350522100 | 2.606666189  | 0.358865028  |
| N | 2.510131182  | 0.592522041  | 0.092670007  |
| H | 2.996797215  | 1.463874105  | 0.187878011  |
| H | 3.040726219  | -0.250378019 | 0.025410001  |
| O | 4.028683288  | 3.343124240  | 0.448851032  |
| H | 3.290999239  | 3.944957282  | 0.396223026  |
| H | 4.735072341  | 3.727516271  | -0.052795003 |
| O | -0.147788008 | -4.355033312 | -0.776844055 |
| H | 0.748516054  | -4.202367305 | -0.494396037 |
| H | -0.118042008 | -4.688809337 | -1.662972118 |
| O | -4.010986289 | -0.668530050 | -1.983119141 |
| H | -4.130752298 | 0.270396022  | -1.876641133 |
| H | -4.808892345 | -1.014337074 | -2.358990169 |
| O | 1.425694104  | 4.514698327  | 0.132010012  |
| H | 1.129348082  | 3.606423260  | 0.149688009  |
| H | 0.834541060  | 5.026858363  | 0.664541049  |
| O | 2.130495153  | -3.143236229 | 0.430600031  |
| H | 2.170572154  | -3.329800240 | 1.360810099  |
| H | 1.625618115  | -2.333655168 | 0.338370025  |
| O | -3.715892268 | 2.068886147  | -1.246838089 |
| H | -4.163472301 | 2.512732178  | -0.562032039 |
| H | -2.917024211 | 1.732358125  | -0.948863068 |
| O | 4.642771335  | -1.883316138 | -0.038310004 |
| H | 5.370392386  | -2.169701155 | -0.573348039 |
| H | 3.985540288  | -2.570744187 | -0.036902001 |

Coord\_8

|   |              |              |              |
|---|--------------|--------------|--------------|
| C | -0.754708052 | -0.577920041 | -0.041751005 |
| N | 0.559831042  | -0.628567045 | 0.068044003  |
| C | 1.184856087  | 0.570146040  | 0.126885009  |
| C | -0.768773054 | 1.698762122  | 0.224324014  |
| N | -1.458446106 | 0.576892040  | -0.100243009 |
| N | 0.564383041  | 1.750784124  | 0.205993013  |
| N | -1.501385109 | -1.691248122 | -0.069147004 |
| H | -1.045634077 | -2.562912184 | -0.262143021 |
| H | -2.435028178 | -1.588944116 | -0.420853031 |
| H | -1.323013096 | 2.626379189  | 0.262654021  |
| N | 2.516839181  | 0.581958044  | 0.119348007  |
| H | 3.004143217  | 1.453253105  | 0.208582013  |
| H | 3.047020221  | -0.261418017 | 0.058332002  |
| O | 4.031446292  | 3.338839238  | 0.472799033  |
| H | 3.299248239  | 3.947319286  | 0.421287030  |
| H | 4.734220339  | 3.708509267  | -0.044673006 |
| O | -0.136935012 | -4.364003316 | -0.782635059 |

|   |              |              |              |
|---|--------------|--------------|--------------|
| H | 0.760323057  | -4.208809303 | -0.505168038 |
| H | -0.110951006 | -4.704500337 | -1.666323123 |
| O | -4.018411291 | -0.664680048 | -2.003281144 |
| H | -4.143470301 | 0.273022022  | -1.892044138 |
| H | -4.813652347 | -1.012798073 | -2.382713170 |
| O | 1.437263104  | 4.517292323  | 0.140846012  |
| H | 1.137219080  | 3.610526262  | 0.153971010  |
| H | 0.820757057  | 5.038667361  | 0.634032043  |
| O | 2.137695155  | -3.136518223 | 0.416978030  |
| H | 2.181078159  | -3.325218237 | 1.346628096  |
| H | 1.625457118  | -2.331641167 | 0.327740024  |
| O | -3.729937267 | 2.060216150  | -1.208948088 |
| H | -4.208673304 | 2.476471181  | -0.522810040 |
| H | -2.955247212 | 1.684300120  | -0.870788061 |
| O | 4.659080334  | -1.890241136 | -0.048081003 |
| H | 5.377055389  | -2.166905157 | -0.600943045 |
| H | 3.996344288  | -2.572221184 | -0.057418002 |

Coord\_9

|   |              |              |              |
|---|--------------|--------------|--------------|
| C | -0.763178053 | -0.560430039 | -0.011983002 |
| N | 0.559420041  | -0.619080045 | 0.073104006  |
| C | 1.198285087  | 0.563188042  | 0.131148008  |
| C | -0.743857056 | 1.701500122  | 0.157488012  |
| N | -1.462008104 | 0.591614042  | -0.039561005 |
| N | 0.580860044  | 1.750145127  | 0.183333013  |
| N | -1.495024108 | -1.686235120 | -0.038421004 |
| H | -1.031219072 | -2.546013183 | -0.261437019 |
| H | -2.434358176 | -1.590444116 | -0.376289025 |
| H | -1.283135092 | 2.638883187  | 0.172336012  |
| N | 2.531749184  | 0.568850043  | 0.144920010  |
| H | 3.021581216  | 1.438999102  | 0.227824014  |
| H | 3.059994219  | -0.275873022 | 0.089294004  |
| O | 4.038300291  | 3.328384241  | 0.492815035  |
| H | 3.313321237  | 3.945447284  | 0.441861034  |
| H | 4.736814339  | 3.678921263  | -0.043278005 |
| O | -0.119395008 | -4.374599318 | -0.788434058 |
| H | 0.778479054  | -4.216166306 | -0.515379037 |
| H | -0.096236005 | -4.722396339 | -1.669353123 |
| O | -4.025835288 | -0.660829050 | -2.023443146 |
| H | -4.156189298 | 0.275649022  | -1.907447139 |
| H | -4.818412349 | -1.011259072 | -2.406437175 |
| O | 1.455710106  | 4.519090324  | 0.146191010  |
| H | 1.149540083  | 3.614573262  | 0.157699011  |
| H | 0.818078060  | 5.051508366  | 0.598772043  |
| O | 2.149886155  | -3.129483224 | 0.404281030  |
| H | 2.195689156  | -3.320071237 | 1.333443095  |
| H | 1.630388119  | -2.329434170 | 0.317344024  |

|   |              |              |              |
|---|--------------|--------------|--------------|
| O | -3.743982272 | 2.051546147  | -1.171057086 |
| H | -4.253874307 | 2.440210177  | -0.483589036 |
| H | -2.993471214 | 1.636240116  | -0.792713059 |
| O | 4.680103340  | -1.896396134 | -0.056148003 |
| H | 5.388879389  | -2.162685154 | -0.625681044 |
| H | 4.012077288  | -2.572880184 | -0.076287007 |

Coord\_10

|   |              |              |              |
|---|--------------|--------------|--------------|
| C | -0.724575054 | -0.309980020 | -0.139502008 |
| N | 0.596051045  | -0.422714031 | 0.010687999  |
| C | 1.291079095  | 0.718973051  | 0.047564002  |
| C | -0.585017043 | 1.924243140  | -0.179204013 |
| N | -1.364910096 | 0.864947061  | -0.241782016 |
| N | 0.723508053  | 1.932063141  | -0.030508000 |
| N | -1.479571105 | -1.423341101 | -0.151859011 |
| H | -1.025196072 | -2.298364163 | -0.328535022 |
| H | -2.398063173 | -1.320673095 | -0.540962037 |
| H | -1.068956077 | 2.887504206  | -0.270127020 |
| N | 2.619836188  | 0.670232048  | 0.167373012  |
| H | 3.142204227  | 1.522697109  | 0.228523015  |
| H | 3.112959226  | -0.196570012 | 0.195986012  |
| O | 4.196028301  | 3.388554245  | 0.450144034  |
| H | 3.509951252  | 4.037529291  | 0.319436021  |
| H | 4.934617355  | 3.657894262  | -0.078955008 |
| O | -0.154320013 | -4.218779304 | -0.696605052 |
| H | 0.730803052  | -4.073099294 | -0.379006028 |
| H | -0.091825006 | -4.624088335 | -1.550617109 |
| O | -4.089339294 | -0.773988054 | -1.965449140 |
| H | -4.234864308 | 0.167451012  | -1.951386139 |
| H | -4.873874353 | -1.176264085 | -2.312571165 |
| O | 1.704712122  | 4.665816337  | -0.139021012 |
| H | 1.354118097  | 3.778486274  | -0.097140009 |
| H | 1.048312074  | 5.256706380  | 0.199363015  |
| O | 2.076288152  | -2.969283216 | 0.563773042  |
| H | 2.057823147  | -3.110214224 | 1.502694109  |
| H | 1.587190115  | -2.162249154 | 0.401539030  |
| O | -3.845299278 | 2.013992146  | -1.364224097 |
| H | -4.393147319 | 2.444727176  | -0.722446052 |
| H | -3.116447223 | 1.616960114  | -0.894529064 |
| O | 4.683892339  | -1.866649134 | 0.208595015  |
| H | 5.408847389  | -2.179117155 | -0.315210022 |
| H | 3.988624285  | -2.514204180 | 0.170493014  |

**For 2-AT**

S0-MIN

|   |             |             |             |
|---|-------------|-------------|-------------|
| C | 2.010404145 | 2.225413158 | 0.765495055 |
| N | 0.733465052 | 1.970661140 | 0.527942038 |

|   |              |              |              |
|---|--------------|--------------|--------------|
| C | 0.473481037  | 0.886914066  | -0.219420018 |
| C | 2.683538196  | 0.459482034  | -0.411087028 |
| N | 3.035677217  | 1.507145108  | 0.318932022  |
| N | 1.446775102  | 0.107636007  | -0.709087052 |
| H | 3.471976249  | -0.166874013 | -0.800625058 |
| N | -0.794624056 | 0.576531040  | -0.514996040 |
| H | -0.974985073 | -0.343057027 | -0.869526064 |
| H | -1.541119113 | 1.064285077  | -0.057112005 |
| H | 2.243360162  | 3.084142222  | 1.377352101  |
| O | -1.151952084 | 3.867401276  | 1.967531141  |
| H | -0.511431036 | 3.323101237  | 1.519413109  |
| H | -0.955890071 | 4.768363342  | 1.748159125  |
| O | -3.108885222 | 2.151434157  | 0.743146053  |
| H | -3.878275281 | 1.877573136  | 1.223994089  |
| H | -2.688481193 | 2.843955204  | 1.246873089  |
| O | -0.991563074 | -2.610662186 | -1.235090089 |
| H | -0.096889005 | -2.891674207 | -1.401037101 |
| H | -1.415368104 | -3.306666240 | -0.748383056 |
| O | 4.834936348  | 3.676631264  | 2.879494209  |
| H | 5.122060367  | 3.616109262  | 3.780013273  |
| H | 5.373438388  | 3.071854219  | 2.378706171  |
| O | 5.880408423  | 1.667978119  | 1.026812073  |
| H | 4.971025359  | 1.635707118  | 0.740742054  |
| H | 6.411359463  | 1.811739131  | 0.255726017  |
| O | 1.965991140  | -2.557345186 | -1.762375127 |
| H | 2.207905159  | -2.559217182 | -2.678387195 |
| H | 1.716794122  | -1.666433123 | -1.540605113 |

S1-MIN

|   |              |              |              |
|---|--------------|--------------|--------------|
| C | 2.035513145  | 2.228362162  | 0.822884058  |
| N | 0.743864051  | 2.020331145  | 0.603730042  |
| C | 0.531622037  | 0.899398066  | -0.138366007 |
| C | 2.709915195  | 0.898875065  | -0.956046067 |
| N | 3.027953219  | 1.569674110  | 0.231588015  |
| N | 1.513038111  | 0.214646013  | -0.739703051 |
| H | 3.504027251  | 0.343978023  | -1.430275101 |
| N | -0.697489048 | 0.429476032  | -0.223432017 |
| H | -0.869588062 | -0.433855032 | -0.709117051 |
| H | -1.465534107 | 0.936715069  | 0.183437013  |
| H | 2.325074168  | 2.974204215  | 1.549250112  |
| O | -1.184937083 | 3.828100277  | 1.953210139  |
| H | -0.504848034 | 3.293568236  | 1.547056112  |
| H | -0.998707073 | 4.731003338  | 1.733732123  |
| O | -3.031856219 | 2.048767146  | 0.716246053  |
| H | -3.834117276 | 1.816593131  | 1.164605082  |
| H | -2.634817190 | 2.773471197  | 1.196510089  |
| O | -0.986562068 | -2.490214178 | -1.246802089 |

|   |              |              |              |
|---|--------------|--------------|--------------|
| H | -0.086706004 | -2.765346199 | -1.404729101 |
| H | -1.402884099 | -3.178712229 | -0.744633052 |
| O | 4.804972348  | 3.635352264  | 2.879658206  |
| H | 5.070462368  | 3.608760260  | 3.788691272  |
| H | 5.355823385  | 3.013705217  | 2.414794175  |
| O | 5.897555422  | 1.539101112  | 1.150562083  |
| H | 5.003932362  | 1.435003104  | 0.840745060  |
| H | 6.452144466  | 1.607066113  | 0.385298030  |
| O | 1.923135138  | -2.582725188 | -1.583203114 |
| H | 2.317628168  | -2.567490186 | -2.444150177 |
| H | 1.853648133  | -1.680706123 | -1.287718095 |

S2-MIN

|   |              |              |              |
|---|--------------|--------------|--------------|
| C | 2.036715145  | 2.118517152  | 0.743930056  |
| N | 0.686605052  | 1.995646143  | 0.532741041  |
| C | 0.315451025  | 0.960504068  | -0.204825013 |
| C | 2.591971185  | 0.714465054  | -0.949486069 |
| N | 2.995698215  | 1.504382110  | 0.101718006  |
| N | 1.300239095  | 0.225188018  | -0.725457055 |
| H | 3.289289234  | 0.057686004  | -1.435800104 |
| N | -0.951704068 | 0.616501047  | -0.403698031 |
| H | -1.142876080 | -0.257077017 | -0.854064060 |
| H | -1.685431120 | 1.103268078  | 0.077084006  |
| H | 2.334283169  | 2.839158202  | 1.490787107  |
| O | -1.142089082 | 3.870173276  | 1.961443142  |
| H | -0.495685034 | 3.319576239  | 1.523747108  |
| H | -0.925355068 | 4.769077345  | 1.753469127  |
| O | -3.183215231 | 2.222876161  | 0.819226057  |
| H | -3.923897282 | 1.981517142  | 1.358319098  |
| H | -2.700484192 | 2.903183209  | 1.284867094  |
| O | -0.756807055 | -2.405244172 | -1.334464094 |
| H | 0.170740013  | -2.536104181 | -1.504013109 |
| H | -1.072007075 | -3.188468231 | -0.902935066 |
| O | 4.878645352  | 3.621721261  | 2.887091210  |
| H | 5.199803373  | 3.544917253  | 3.774676272  |
| H | 5.333864386  | 2.963212214  | 2.371416172  |
| O | 5.791491415  | 1.552241112  | 1.006956073  |
| H | 4.900191354  | 1.538340113  | 0.661959050  |
| H | 6.361237456  | 1.770437127  | 0.282273019  |
| O | 2.293415165  | -2.555388183 | -1.654684118 |
| H | 2.835968205  | -3.228916233 | -2.045995146 |
| H | 2.653949192  | -2.369708173 | -0.797194058 |

T1-MIN

|   |             |             |             |
|---|-------------|-------------|-------------|
| C | 2.407829171 | 2.029857145 | 0.980960071 |
| N | 1.038863074 | 1.949059140 | 0.591667044 |
| C | 0.752902055 | 0.679947049 | 0.010798999 |

|   |              |              |              |
|---|--------------|--------------|--------------|
| C | 2.847250206  | 0.791590055  | -0.853764064 |
| N | 3.316175238  | 1.550415112  | 0.206815016  |
| N | 1.604170117  | 0.163116014  | -0.792671059 |
| H | 3.586759261  | 0.340098027  | -1.490943109 |
| N | -0.422672030 | 0.127998007  | 0.374079027  |
| H | -0.664090047 | -0.723259054 | -0.102092008 |
| H | -1.185118088 | 0.759254055  | 0.542419037  |
| H | 2.651867191  | 2.587215189  | 1.869896134  |
| O | -0.984758071 | 3.994929289  | 1.893237137  |
| H | -0.279822018 | 3.580436259  | 1.410837103  |
| H | -0.820116059 | 4.928731354  | 1.885988133  |
| O | -2.812620201 | 2.113047153  | 0.678807048  |
| H | -3.669201266 | 1.921617140  | 1.037650073  |
| H | -2.471278179 | 2.868816206  | 1.148115083  |
| O | -0.877262063 | -2.707545195 | -1.085605078 |
| H | 0.021603000  | -2.880417205 | -1.352890099 |
| H | -1.188104087 | -3.489250251 | -0.648025046 |
| O | 4.883151354  | 3.608940260  | 2.901336211  |
| H | 5.192565372  | 3.637391263  | 3.796362273  |
| H | 5.470909392  | 3.027340220  | 2.427970175  |
| O | 6.100546439  | 1.601362117  | 1.185884088  |
| H | 5.257464378  | 1.545553111  | 0.744722054  |
| H | 6.772052487  | 1.598207115  | 0.517874039  |
| O | 1.992320142  | -2.547043185 | -1.759953126 |
| H | 2.236736159  | -2.546465185 | -2.674907193 |
| H | 1.845557134  | -1.638177116 | -1.509195109 |

T2-MIN

|   |              |              |              |
|---|--------------|--------------|--------------|
| C | 2.122265151  | 2.040446146  | 0.949914067  |
| N | 0.761684053  | 1.880329133  | 0.642829044  |
| C | 0.475079035  | 0.949734068  | -0.183679011 |
| C | 2.747535199  | 0.693868052  | -0.752786054 |
| N | 3.113343223  | 1.592034114  | 0.090076006  |
| N | 1.493048107  | 0.045757004  | -0.604504043 |
| H | 3.419109246  | 0.297605020  | -1.497190110 |
| N | -0.736964051 | 0.693320052  | -0.724373051 |
| H | -0.912166066 | -0.271017022 | -0.941882067 |
| H | -1.515604107 | 1.187469085  | -0.324520022 |
| H | 2.393918170  | 2.819733201  | 1.637142119  |
| O | -1.119728078 | 3.797204274  | 1.976554142  |
| H | -0.461732032 | 3.228349230  | 1.583424114  |
| H | -0.875372065 | 4.689700339  | 1.771962126  |
| O | -3.082905223 | 2.144201156  | 0.680635049  |
| H | -3.816185274 | 1.829165133  | 1.191529086  |
| H | -2.636442188 | 2.807073201  | 1.202426089  |
| O | -0.974682071 | -2.576953188 | -1.210258087 |
| H | -0.110639009 | -2.936941209 | -1.382209101 |

|   |              |              |              |
|---|--------------|--------------|--------------|
| H | -1.442812104 | -3.216788231 | -0.689396049 |
| O | 4.835290346  | 3.646739264  | 2.901585210  |
| H | 5.101254366  | 3.575046256  | 3.807900274  |
| H | 5.385072387  | 3.048730221  | 2.405655173  |
| O | 5.942628428  | 1.690865120  | 1.018256071  |
| H | 5.096168369  | 1.713361122  | 0.583482043  |
| H | 6.606958477  | 1.770834126  | 0.347697023  |
| O | 2.007979142  | -2.708548197 | -1.672935118 |
| H | 2.250285161  | -2.557300185 | -2.575653184 |
| H | 1.830267129  | -1.863268136 | -1.281926091 |

T3-MIN

|   |              |              |              |
|---|--------------|--------------|--------------|
| C | 2.159525156  | 2.146813154  | 0.849934059  |
| N | 0.820915058  | 1.955810140  | 0.619591045  |
| C | 0.538385039  | 0.884773062  | -0.154386012 |
| C | 2.764842200  | 0.756749057  | -0.858497062 |
| N | 3.130231227  | 1.560059113  | 0.200426015  |
| N | 1.497756107  | 0.163105012  | -0.749034055 |
| H | 3.532873253  | 0.157731011  | -1.318029093 |
| N | -0.720952052 | 0.502748036  | -0.299654020 |
| H | -0.924765067 | -0.352255027 | -0.786288059 |
| H | -1.467642106 | 1.030762074  | 0.118257007  |
| H | 2.427501176  | 2.866196207  | 1.607485116  |
| O | -1.081122079 | 3.868295279  | 1.983440140  |
| H | -0.407631029 | 3.323690238  | 1.585034115  |
| H | -0.836236063 | 4.771686342  | 1.834106130  |
| O | -2.991633218 | 2.160985156  | 0.734857053  |
| H | -3.798673275 | 1.937483139  | 1.179014086  |
| H | -2.581367187 | 2.871687209  | 1.223432087  |
| O | -1.090580080 | -2.428570172 | -1.307857094 |
| H | -0.205340013 | -2.744370195 | -1.470716107 |
| H | -1.534146113 | -3.096502221 | -0.801254060 |
| O | 4.813232344  | 3.661485264  | 2.914454208  |
| H | 5.097343365  | 3.598644259  | 3.815803277  |
| H | 5.359868384  | 3.063690220  | 2.413600171  |
| O | 5.936983429  | 1.662022118  | 1.108407077  |
| H | 5.057975367  | 1.603291116  | 0.742709053  |
| H | 6.536211469  | 1.763481129  | 0.381963028  |
| O | 1.816748132  | -2.639875188 | -1.619365119 |
| H | 2.255167165  | -2.630178190 | -2.459047178 |
| H | 1.773095126  | -1.741003124 | -1.313036094 |

S<sub>2</sub>/S<sub>1</sub>

|   |             |             |              |
|---|-------------|-------------|--------------|
| C | 2.060445146 | 2.282308163 | 0.775020055  |
| N | 0.748986053 | 1.894929139 | 0.530101039  |
| C | 0.484232034 | 0.790414060 | -0.192116012 |
| C | 2.733902196 | 0.476579036 | -0.460365035 |

|   |              |              |              |
|---|--------------|--------------|--------------|
| N | 3.059404218  | 1.543423109  | 0.279551021  |
| N | 1.459598104  | 0.044074004  | -0.720645050 |
| H | 3.538865254  | -0.102917006 | -0.878035064 |
| N | -0.779972054 | 0.433360029  | -0.386366026 |
| H | -0.964289067 | -0.450938033 | -0.826183060 |
| H | -1.534823111 | 0.969351071  | 0.004144003  |
| H | 2.262306163  | 3.121963224  | 1.411395100  |
| O | -1.224910090 | 3.930384281  | 2.028615145  |
| H | -0.507626035 | 3.414655246  | 1.683714120  |
| H | -1.007725073 | 4.841864347  | 1.881828134  |
| O | -3.031892219 | 2.117598151  | 0.691950049  |
| H | -3.844069275 | 1.865938137  | 1.111465082  |
| H | -2.666964190 | 2.844367206  | 1.190400086  |
| O | -1.072698075 | -2.573787184 | -1.307675094 |
| H | -0.172309013 | -2.824868204 | -1.497719107 |
| H | -1.433421103 | -3.250974235 | -0.750194054 |
| O | 4.835406347  | 3.711157270  | 2.904373207  |
| H | 5.119665369  | 3.611883258  | 3.802531274  |
| H | 5.365238384  | 3.115043226  | 2.384304173  |
| O | 5.902844427  | 1.719795124  | 1.041696078  |
| H | 5.003443360  | 1.669064118  | 0.729622050  |
| H | 6.456185465  | 1.827653131  | 0.280503022  |
| O | 1.866502134  | -2.603386189 | -1.765776128 |
| H | 2.184240157  | -2.562330184 | -2.657024193 |
| H | 1.700955122  | -1.706777125 | -1.486005107 |

S<sub>2</sub>/T<sub>1</sub>

|   |              |              |              |
|---|--------------|--------------|--------------|
| C | 2.036715145  | 2.118517152  | 0.743930056  |
| N | 0.686605052  | 1.995646143  | 0.532741041  |
| C | 0.315451025  | 0.960504068  | -0.204825013 |
| C | 2.591971185  | 0.714465054  | -0.949486069 |
| N | 2.995698215  | 1.504382110  | 0.101718006  |
| N | 1.300239095  | 0.225188018  | -0.725457055 |
| H | 3.289289234  | 0.057686004  | -1.435800104 |
| N | -0.951704068 | 0.616501047  | -0.403698031 |
| H | -1.142876080 | -0.257077017 | -0.854064060 |
| H | -1.685431120 | 1.103268078  | 0.077084006  |
| H | 2.334283169  | 2.839158202  | 1.490787107  |
| O | -1.142089082 | 3.870173276  | 1.961443142  |
| H | -0.495685034 | 3.319576239  | 1.523747108  |
| H | -0.925355068 | 4.769077345  | 1.753469127  |
| O | -3.183215231 | 2.222876161  | 0.819226057  |
| H | -3.923897282 | 1.981517142  | 1.358319098  |
| H | -2.700484192 | 2.903183209  | 1.284867094  |
| O | -0.756807055 | -2.405244172 | -1.334464094 |
| H | 0.170740013  | -2.536104181 | -1.504013109 |
| H | -1.072007075 | -3.188468231 | -0.902935066 |



|   |             |              |              |
|---|-------------|--------------|--------------|
| O | 4.878645352 | 3.621721261  | 2.887091210  |
| H | 5.199803373 | 3.544917253  | 3.774676272  |
| H | 5.333864386 | 2.963212214  | 2.371416172  |
| O | 5.791491415 | 1.552241112  | 1.006956073  |
| H | 4.900191354 | 1.538340113  | 0.661959050  |
| H | 6.361237456 | 1.770437127  | 0.282273019  |
| O | 2.293415165 | -2.555388183 | -1.654684118 |
| H | 2.835968205 | -3.228916233 | -2.045995146 |
| H | 2.653949192 | -2.369708173 | -0.797194058 |

S<sub>1</sub>/T<sub>1</sub>

|   |              |              |              |
|---|--------------|--------------|--------------|
| C | 2.071994148  | 2.212038161  | 0.824554057  |
| N | 0.755901056  | 2.005069144  | 0.587854042  |
| C | 0.515846036  | 0.897609066  | -0.152283009 |
| C | 2.715764196  | 0.852221063  | -0.909119063 |
| N | 3.066554223  | 1.594478114  | 0.216479015  |
| N | 1.491892109  | 0.189024013  | -0.737427055 |
| H | 3.499197254  | 0.298619024  | -1.400590099 |
| N | -0.729020053 | 0.455747032  | -0.257059020 |
| H | -0.909310064 | -0.405588029 | -0.742114052 |
| H | -1.490730110 | 0.971894069  | 0.148796012  |
| H | 2.337757170  | 2.943288214  | 1.572777116  |
| O | -1.168031087 | 3.824687274  | 1.955171142  |
| H | -0.492052036 | 3.289524237  | 1.544481109  |
| H | -0.972845069 | 4.728738343  | 1.748396127  |
| O | -3.051377218 | 2.079015150  | 0.723462051  |
| H | -3.851062278 | 1.843580133  | 1.174689084  |
| H | -2.645065189 | 2.792651200  | 1.211820086  |
| O | -1.027388072 | -2.478182180 | -1.274432089 |
| H | -0.129189010 | -2.768451200 | -1.413017102 |
| H | -1.460186105 | -3.150923227 | -0.764899053 |
| O | 4.856086351  | 3.632844260  | 2.909540210  |
| H | 5.093801365  | 3.583179260  | 3.825151278  |
| H | 5.417602389  | 3.017360218  | 2.448599177  |
| O | 5.925980427  | 1.578372112  | 1.130251080  |
| H | 5.038135363  | 1.536939111  | 0.788667055  |
| H | 6.507685471  | 1.644897117  | 0.385593030  |
| O | 1.888592135  | -2.616299188 | -1.556716110 |
| H | 2.301075164  | -2.610856188 | -2.409340173 |
| H | 1.818382131  | -1.711793122 | -1.270388090 |

S<sub>1</sub>/S<sub>0</sub>

|   |             |             |              |
|---|-------------|-------------|--------------|
| C | 2.031688146 | 2.264279163 | 0.855384061  |
| N | 0.756042055 | 2.101385150 | 0.623201045  |
| C | 0.572282043 | 0.942881069 | -0.096529005 |
| C | 2.625108190 | 1.140427085 | -1.054436078 |
| N | 2.976781213 | 1.482141108 | 0.294716019  |

|   |              |              |              |
|---|--------------|--------------|--------------|
| N | 1.619009115  | 0.255062016  | -0.594017041 |
| H | 3.404056244  | 0.721336050  | -1.673898120 |
| N | -0.632993046 | 0.446297032  | -0.185591013 |
| H | -0.778891056 | -0.438519031 | -0.643937046 |
| H | -1.420302100 | 0.952789066  | 0.187484012  |
| H | 2.367134170  | 3.010282218  | 1.562671111  |
| O | -1.219495088 | 3.865492280  | 1.955738140  |
| H | -0.515543040 | 3.357187242  | 1.556284111  |
| H | -1.057741076 | 4.776184343  | 1.749504124  |
| O | -2.995314217 | 2.039110148  | 0.686934052  |
| H | -3.800974275 | 1.791770130  | 1.121160080  |
| H | -2.623802191 | 2.775198199  | 1.170816083  |
| O | -0.896030065 | -2.405912173 | -1.241652088 |
| H | 0.013506000  | -2.661313191 | -1.383723098 |
| H | -1.313764093 | -3.116905226 | -0.773223054 |
| O | 4.812966348  | 3.568537259  | 2.825701203  |
| H | 5.114213367  | 3.577260259  | 3.724006270  |
| H | 5.341484385  | 2.924589212  | 2.364425169  |
| O | 5.850140421  | 1.400177103  | 1.161846084  |
| H | 4.955701359  | 1.198042088  | 0.906002066  |
| H | 6.372034460  | 1.414289101  | 0.371180025  |
| O | 1.992265145  | -2.531771182 | -1.412996104 |
| H | 2.532767184  | -2.547615183 | -2.190398156 |
| H | 2.003736146  | -1.641610116 | -1.070561077 |

T<sub>1</sub>/S<sub>0</sub>

|   |              |              |              |
|---|--------------|--------------|--------------|
| C | 1.960190140  | 2.363459172  | 0.892644066  |
| N | 0.726979053  | 2.146382155  | 0.601789041  |
| C | 0.609903043  | 0.947599070  | -0.138174011 |
| C | 2.663444193  | 1.245138091  | -0.987650073 |
| N | 2.942320211  | 1.536921113  | 0.428147030  |
| N | 1.637797119  | 0.343685023  | -0.700442052 |
| H | 3.511239254  | 0.842117058  | -1.525882111 |
| N | -0.577700040 | 0.403224031  | -0.125317010 |
| H | -0.724321054 | -0.487630035 | -0.571954043 |
| H | -1.361940099 | 0.894596063  | 0.272525019  |
| H | 2.251025162  | 3.158563229  | 1.566614111  |
| O | -1.316945094 | 3.855160279  | 1.960353142  |
| H | -0.611701044 | 3.378714241  | 1.530852112  |
| H | -1.192297086 | 4.774508344  | 1.766735125  |
| O | -3.003507214 | 1.954026140  | 0.671291048  |
| H | -3.822762275 | 1.688469122  | 1.067894077  |
| H | -2.684354192 | 2.712490198  | 1.156845084  |
| O | -0.824876061 | -2.459091179 | -1.135401081 |
| H | 0.090604009  | -2.681868192 | -1.295942091 |
| H | -1.194415086 | -3.165901229 | -0.622222045 |
| O | 4.875634349  | 3.535517255  | 2.750792200  |

|   |             |              |              |
|---|-------------|--------------|--------------|
| H | 5.162452371 | 3.558971259  | 3.653501265  |
| H | 5.395831386 | 2.867035207  | 2.315225168  |
| O | 5.853267419 | 1.324488098  | 1.119094082  |
| H | 4.966794359 | 1.055052077  | 0.904882068  |
| H | 6.339486456 | 1.340098096  | 0.306075020  |
| O | 2.046741148 | -2.441023174 | -1.437621103 |
| H | 2.528015183 | -2.502535182 | -2.250758161 |
| H | 1.991091144 | -1.513821108 | -1.208409089 |

LIIC path connecting Franck-Condon point and S1-MIN

Coord\_1

|   |              |              |              |
|---|--------------|--------------|--------------|
| C | 2.010404145  | 2.225413158  | 0.765495055  |
| N | 0.733465052  | 1.970661140  | 0.527942038  |
| C | 0.473481037  | 0.886914066  | -0.219420018 |
| C | 2.683538196  | 0.459482034  | -0.411087028 |
| N | 3.035677217  | 1.507145108  | 0.318932022  |
| N | 1.446775102  | 0.107636007  | -0.709087052 |
| H | 3.471976249  | -0.166874013 | -0.800625058 |
| N | -0.794624056 | 0.576531040  | -0.514996040 |
| H | -0.974985073 | -0.343057027 | -0.869526064 |
| H | -1.541119113 | 1.064285077  | -0.057112005 |
| H | 2.243360162  | 3.084142222  | 1.377352101  |
| O | -1.151952084 | 3.867401276  | 1.967531141  |
| H | -0.511431036 | 3.323101237  | 1.519413109  |
| H | -0.955890071 | 4.768363342  | 1.748159125  |
| O | -3.108885222 | 2.151434157  | 0.743146053  |
| H | -3.878275281 | 1.877573136  | 1.223994089  |
| H | -2.688481193 | 2.843955204  | 1.246873089  |
| O | -0.991563074 | -2.610662186 | -1.235090089 |
| H | -0.096889005 | -2.891674207 | -1.401037101 |
| H | -1.415368104 | -3.306666240 | -0.748383056 |
| O | 4.834936348  | 3.676631264  | 2.879494209  |
| H | 5.122060367  | 3.616109262  | 3.780013273  |
| H | 5.373438388  | 3.071854219  | 2.378706171  |
| O | 5.880408423  | 1.667978119  | 1.026812073  |
| H | 4.971025359  | 1.635707118  | 0.740742054  |
| H | 6.411359463  | 1.811739131  | 0.255726017  |
| O | 1.965991140  | -2.557345186 | -1.762375127 |
| H | 2.207905159  | -2.559217182 | -2.678387195 |
| H | 1.716794122  | -1.666433123 | -1.540605113 |

Coord\_2

|   |             |             |              |
|---|-------------|-------------|--------------|
| C | 2.016752145 | 2.223324162 | 0.763047055  |
| N | 0.737412053 | 1.978860143 | 0.529791036  |
| C | 0.474488034 | 0.889649066 | -0.211194016 |
| C | 2.694346191 | 0.478283034 | -0.471949031 |
| N | 3.037822221 | 1.505339106 | 0.306494023  |

|   |              |              |              |
|---|--------------|--------------|--------------|
| N | 1.440514104  | 0.108563009  | -0.712179050 |
| H | 3.488921251  | -0.138605010 | -0.863766064 |
| N | -0.794671058 | 0.569826042  | -0.481035037 |
| H | -0.980287069 | -0.344701022 | -0.846857063 |
| H | -1.539478108 | 1.067796078  | -0.030499004 |
| H | 2.260534165  | 3.073994222  | 1.382057100  |
| O | -1.155649085 | 3.863454281  | 1.965878139  |
| H | -0.510726034 | 3.320248241  | 1.522419111  |
| H | -0.960690069 | 4.764635341  | 1.746497127  |
| O | -3.100341222 | 2.140430155  | 0.740091055  |
| H | -3.873380281 | 1.871190136  | 1.217329086  |
| H | -2.682540194 | 2.836529202  | 1.241213088  |
| O | -0.990973073 | -2.596846188 | -1.236480090 |
| H | -0.095720004 | -2.877194209 | -1.401539099 |
| H | -1.413938103 | -3.292023239 | -0.748057056 |
| O | 4.813122344  | 3.687933268  | 2.861457207  |
| H | 5.084353366  | 3.637646263  | 3.767548271  |
| H | 5.357798385  | 3.074913223  | 2.377721171  |
| O | 5.882646425  | 1.649652118  | 1.054878073  |
| H | 4.978985359  | 1.611373114  | 0.752729056  |
| H | 6.427934464  | 1.778460126  | 0.291120021  |
| O | 1.961265142  | -2.559698183 | -1.742561128 |
| H | 2.220130159  | -2.559661183 | -2.652456192 |
| H | 1.732026124  | -1.667553121 | -1.512597111 |

Coord\_3

|   |              |              |              |
|---|--------------|--------------|--------------|
| C | 2.021966144  | 2.222380157  | 0.760920053  |
| N | 0.740478053  | 1.987526145  | 0.530740036  |
| C | 0.476172035  | 0.892004063  | -0.203364013 |
| C | 2.703194194  | 0.501057035  | -0.531596039 |
| N | 3.038869220  | 1.504453110  | 0.295034023  |
| N | 1.436551101  | 0.110003006  | -0.713630049 |
| H | 3.502696253  | -0.107574009 | -0.925937067 |
| N | -0.792989057 | 0.561588038  | -0.448313033 |
| H | -0.982831072 | -0.348231026 | -0.824618061 |
| H | -1.536915112 | 1.069293079  | -0.006293002 |
| H | 2.275518163  | 3.064983222  | 1.387146097  |
| O | -1.159345081 | 3.859506280  | 1.964224143  |
| H | -0.510021038 | 3.317395240  | 1.525425108  |
| H | -0.965490072 | 4.760905345  | 1.744835124  |
| O | -3.091795221 | 2.129425152  | 0.737035051  |
| H | -3.868483280 | 1.864806137  | 1.210664088  |
| H | -2.676598195 | 2.829103205  | 1.235553088  |
| O | -0.990383072 | -2.583029185 | -1.237870090 |
| H | -0.094551004 | -2.862713204 | -1.402040103 |
| H | -1.412508102 | -3.277379238 | -0.747731051 |
| O | 4.793881343  | 3.698599264  | 2.843561205  |

|   |             |              |              |
|---|-------------|--------------|--------------|
| H | 5.050664365 | 3.658957262  | 3.754409270  |
| H | 5.343588383 | 3.077341220  | 2.376377172  |
| O | 5.883442424 | 1.630578115  | 1.082772080  |
| H | 4.985250357 | 1.585786113  | 0.766336055  |
| H | 6.441658465 | 1.743564125  | 0.325820026  |
| O | 1.956538140 | -2.562050186 | -1.722747123 |
| H | 2.232355159 | -2.560104184 | -2.626524189 |
| H | 1.747257126 | -1.668673119 | -1.484588108 |

Coord\_4

|   |              |              |              |
|---|--------------|--------------|--------------|
| C | 2.026147147  | 2.222547160  | 0.759045057  |
| N | 0.742727056  | 1.996714144  | 0.530727040  |
| C | 0.478568033  | 0.894019064  | -0.195930014 |
| C | 2.710124193  | 0.527713037  | -0.589924040 |
| N | 3.038882221  | 1.504358107  | 0.284494018  |
| N | 1.434999104  | 0.111992009  | -0.713456050 |
| H | 3.513306252  | -0.074076004 | -0.986924073 |
| N | -0.789590056 | 0.551913037  | -0.416776032 |
| H | -0.982621068 | -0.353594026 | -0.802761056 |
| H | -1.533443112 | 1.068885078  | 0.015513000  |
| H | 2.288461166  | 3.057094222  | 1.392557099  |
| O | -1.163042083 | 3.855557279  | 1.962570141  |
| H | -0.509316036 | 3.314541239  | 1.528431110  |
| H | -0.970289069 | 4.757175344  | 1.743173127  |
| O | -3.083250220 | 2.118420154  | 0.733979052  |
| H | -3.863587279 | 1.858422132  | 1.203999084  |
| H | -2.670657191 | 2.821677202  | 1.229892087  |
| O | -0.989793071 | -2.569212187 | -1.239260091 |
| H | -0.093382004 | -2.848232205 | -1.402542102 |
| H | -1.411078101 | -3.262734236 | -0.747406052 |
| O | 4.776956344  | 3.708584267  | 2.825858205  |
| H | 5.020926360  | 3.680097264  | 3.740668268  |
| H | 5.330674384  | 3.079185223  | 2.374647170  |
| O | 5.882853423  | 1.610866114  | 1.110397080  |
| H | 4.989753359  | 1.558839111  | 0.781619054  |
| H | 6.452469466  | 1.707170124  | 0.359609025  |
| O | 1.951811142  | -2.564402183 | -1.702933123 |
| H | 2.244580159  | -2.560547185 | -2.600592186 |
| H | 1.762488128  | -1.669793118 | -1.456580106 |

Coord\_5

|   |             |             |              |
|---|-------------|-------------|--------------|
| C | 2.029335149 | 2.223835162 | 0.757316055  |
| N | 0.744178055 | 2.006494144 | 0.529614037  |
| C | 0.481712034 | 0.895722062 | -0.188922014 |
| C | 2.715161193 | 0.558166039 | -0.646793047 |
| N | 3.037879219 | 1.504949108 | 0.274842021  |
| N | 1.435993105 | 0.114575008 | -0.711647053 |

|   |              |              |              |
|---|--------------|--------------|--------------|
| H | 3.520703256  | -0.038477002 | -1.046421075 |
| N | -0.784465054 | 0.540861038  | -0.386419028 |
| H | -0.979618072 | -0.360795027 | -0.781256055 |
| H | -1.529072108 | 1.066636074  | 0.034829002  |
| H | 2.299420168  | 3.050373221  | 1.398167103  |
| O | -1.166739085 | 3.851609278  | 1.960917140  |
| H | -0.508610034 | 3.311687238  | 1.531436112  |
| H | -0.975089072 | 4.753446343  | 1.741511124  |
| O | -3.074705219 | 2.107416151  | 0.730924054  |
| H | -3.858691278 | 1.852038132  | 1.197334086  |
| H | -2.664715192 | 2.814250205  | 1.224232087  |
| O | -0.989202070 | -2.555395184 | -1.240650091 |
| H | -0.092214004 | -2.833750206 | -1.403043100 |
| H | -1.409647100 | -3.248090235 | -0.747080052 |
| O | 4.762221340  | 3.717826268  | 2.808522200  |
| H | 4.995327358  | 3.701096266  | 3.726481269  |
| H | 5.319005385  | 3.080493222  | 2.372546172  |
| O | 5.880899425  | 1.590658116  | 1.137617079  |
| H | 4.992349360  | 1.530448111  | 0.798738060  |
| H | 6.460162465  | 1.669447120  | 0.392151028  |
| O | 1.947085139  | -2.566753185 | -1.683119124 |
| H | 2.256805164  | -2.560990185 | -2.574660183 |
| H | 1.777720130  | -1.670913121 | -1.428571103 |

Coord\_6

|   |              |              |              |
|---|--------------|--------------|--------------|
| C | 2.031456144  | 2.226325158  | 0.755534056  |
| N | 0.744764055  | 2.016959143  | 0.527119041  |
| C | 0.485616034  | 0.897105067  | -0.182432015 |
| C | 2.718307194  | 0.592321044  | -0.702012053 |
| N | 3.035796218  | 1.506169110  | 0.266055017  |
| N | 1.439689101  | 0.117766010  | -0.708150054 |
| H | 3.524777254  | -0.001263998 | -1.103973080 |
| N | -0.777602054 | 0.528407037  | -0.357318026 |
| H | -0.973731071 | -0.369951027 | -0.760093055 |
| H | -1.523842111 | 1.062525076  | 0.051402003  |
| H | 2.308278166  | 3.044995219  | 1.403713102  |
| O | -1.170435086 | 3.847660277  | 1.959263143  |
| H | -0.507905038 | 3.308834237  | 1.534442108  |
| H | -0.979888069 | 4.749716342  | 1.739849126  |
| O | -3.066159218 | 2.096411148  | 0.727868050  |
| H | -3.853795277 | 1.845655133  | 1.190668088  |
| H | -2.658773193 | 2.806824202  | 1.218572086  |
| O | -0.988612069 | -2.541578181 | -1.242040092 |
| H | -0.091045009 | -2.819269202 | -1.403545099 |
| H | -1.408217099 | -3.233446233 | -0.746754052 |
| O | 4.749825342  | 3.726267270  | 2.791970202  |
| H | 4.974526358  | 3.721951268  | 3.712194266  |

|   |             |              |              |
|---|-------------|--------------|--------------|
| H | 5.308720381 | 3.081321221  | 2.370192169  |
| O | 5.877535424 | 1.570133113  | 1.164241082  |
| H | 4.992757361 | 1.500621110  | 0.817989057  |
| H | 6.464320464 | 1.630655115  | 0.422937032  |
| O | 1.942358142 | -2.569106188 | -1.663304119 |
| H | 2.269030164 | -2.561434186 | -2.548728186 |
| H | 1.792951127 | -1.672033120 | -1.400562101 |

Coord\_7

|   |              |              |              |
|---|--------------|--------------|--------------|
| C | 2.032223144  | 2.230245160  | 0.753292053  |
| N | 0.744231052  | 2.028238148  | 0.522676037  |
| C | 0.490230036  | 0.898084066  | -0.176664015 |
| C | 2.719528197  | 0.630039047  | -0.755327052 |
| N | 3.032417221  | 1.508060109  | 0.258093016  |
| N | 1.446257106  | 0.121509008  | -0.702836050 |
| H | 3.525345251  | 0.036880003  | -1.158901086 |
| N | -0.769020053 | 0.514366038  | -0.329673023 |
| H | -0.964815069 | -0.381415028 | -0.739257055 |
| H | -1.517872108 | 1.056369078  | 0.064713006  |
| H | 2.314606169  | 3.041397221  | 1.408626100  |
| O | -1.174132082 | 3.843712276  | 1.957609141  |
| H | -0.507200036 | 3.305980236  | 1.537448110  |
| H | -0.984688072 | 4.745986341  | 1.738187123  |
| O | -3.057614218 | 2.085406151  | 0.724812051  |
| H | -3.848898276 | 1.839271133  | 1.184003085  |
| H | -2.652831188 | 2.799398200  | 1.212911085  |
| O | -0.988022074 | -2.527761183 | -1.243430092 |
| H | -0.089876009 | -2.804788203 | -1.404046103 |
| H | -1.406787104 | -3.218802232 | -0.746428053 |
| O | 4.740486343  | 3.733909267  | 2.777073201  |
| H | 4.960008359  | 3.742585270  | 3.698545266  |
| H | 5.300331382  | 3.081731222  | 2.367935170  |
| O | 5.872579425  | 1.549505112  | 1.190001087  |
| H | 4.990463362  | 1.469620107  | 0.839846062  |
| H | 6.464193467  | 1.591181112  | 0.451222032  |
| O | 1.937631139  | -2.571458185 | -1.643490119 |
| H | 2.281255164  | -2.561877182 | -2.522796183 |
| H | 1.808183128  | -1.673153118 | -1.372554098 |

Coord\_8

|   |             |             |              |
|---|-------------|-------------|--------------|
| C | 2.030964147 | 2.236088161 | 0.749766055  |
| N | 0.741996056 | 2.040516145 | 0.515223035  |
| C | 0.495368035 | 0.898430064 | -0.172001011 |
| C | 2.718714195 | 0.671083050 | -0.806446056 |
| N | 3.027256218 | 1.510878110 | 0.250799017  |
| N | 1.455864102 | 0.125606009 | -0.695461050 |
| H | 3.522099252 | 0.074984003 | -1.210236089 |

|   |              |              |              |
|---|--------------|--------------|--------------|
| N | -0.758810054 | 0.498248035  | -0.303840024 |
| H | -0.952648067 | -0.395983029 | -0.718655053 |
| H | -1.511443107 | 1.047660075  | 0.073860004  |
| H | 2.317434166  | 3.040503218  | 1.411741102  |
| O | -1.177828084 | 3.839764275  | 1.955956140  |
| H | -0.506495035 | 3.303126240  | 1.540453112  |
| H | -0.989487069 | 4.742257340  | 1.736525126  |
| O | -3.049069222 | 2.074401148  | 0.721757053  |
| H | -3.844002275 | 1.832887133  | 1.177338087  |
| H | -2.646889189 | 2.791971202  | 1.207251085  |
| O | -0.987432073 | -2.513944180 | -1.244820087 |
| H | -0.088707009 | -2.790307199 | -1.404548102 |
| H | -1.405357103 | -3.204158231 | -0.746102053 |
| O | 4.735999343  | 3.740911271  | 2.765480197  |
| H | 4.954602359  | 3.762771271  | 3.686981267  |
| H | 5.295044382  | 3.081780224  | 2.366590171  |
| O | 5.865598424  | 1.528977110  | 1.214579089  |
| H | 4.984584361  | 1.438280103  | 0.864951062  |
| H | 6.458568466  | 1.551576111  | 0.476034036  |
| O | 1.932904142  | -2.573809187 | -1.623676119 |
| H | 2.293480164  | -2.562320183 | -2.496864180 |
| H | 1.823414130  | -1.674272122 | -1.344545096 |

Coord\_9

|   |              |              |              |
|---|--------------|--------------|--------------|
| C | 2.026453144  | 2.244778161  | 0.743432052  |
| N | 0.736984054  | 2.054028147  | 0.502957035  |
| C | 0.500648033  | 0.897690062  | -0.169060013 |
| C | 2.715594198  | 0.715112052  | -0.855204061 |
| N | 3.019433217  | 1.515277108  | 0.243695019  |
| N | 1.468659105  | 0.129697010  | -0.685659047 |
| H | 3.514501251  | 0.111744010  | -1.256813091 |
| N | -0.747160053 | 0.479075033  | -0.280264019 |
| H | -0.936882067 | -0.415145029 | -0.697931048 |
| H | -1.505057107 | 1.035319074  | 0.077554006  |
| H | 2.315014164  | 3.043999217  | 1.410909103  |
| O | -1.181525085 | 3.835816274  | 1.954302138  |
| H | -0.505789038 | 3.300273239  | 1.543459109  |
| H | -0.994287072 | 4.738527339  | 1.734863123  |
| O | -3.040524221 | 2.063396150  | 0.718701054  |
| H | -3.839106275 | 1.826503134  | 1.170673083  |
| H | -2.640948190 | 2.784545200  | 1.201591084  |
| O | -0.986842072 | -2.500127182 | -1.246210088 |
| H | -0.087538009 | -2.775826200 | -1.405049100 |
| H | -1.403926101 | -3.189514229 | -0.745776054 |
| O | 4.739851340  | 3.747753268  | 2.759883201  |
| H | 4.962855359  | 3.781966271  | 3.679981263  |
| H | 5.295104380  | 3.081456224  | 2.367733172  |



|   |             |              |              |
|---|-------------|--------------|--------------|
| O | 5.855711419 | 1.508603108  | 1.237746088  |
| H | 4.973741356 | 1.408493102  | 0.893941064  |
| H | 6.445742464 | 1.512459106  | 0.496465035  |
| O | 1.928178139 | -2.576161184 | -1.603862115 |
| H | 2.305705164 | -2.562763183 | -2.470932177 |
| H | 1.838645132 | -1.675392120 | -1.316537093 |

Coord\_10

|   |              |              |              |
|---|--------------|--------------|--------------|
| C | 2.035513145  | 2.228362162  | 0.822884058  |
| N | 0.743864051  | 2.020331145  | 0.603730042  |
| C | 0.531622037  | 0.899398066  | -0.138366007 |
| C | 2.709915195  | 0.898875065  | -0.956046067 |
| N | 3.027953219  | 1.569674110  | 0.231588015  |
| N | 1.513038111  | 0.214646013  | -0.739703051 |
| H | 3.504027251  | 0.343978023  | -1.430275101 |
| N | -0.697489048 | 0.429476032  | -0.223432017 |
| H | -0.869588062 | -0.433855032 | -0.709117051 |
| H | -1.465534107 | 0.936715069  | 0.183437013  |
| H | 2.325074168  | 2.974204215  | 1.549250112  |
| O | -1.184937083 | 3.828100277  | 1.953210139  |
| H | -0.504848034 | 3.293568236  | 1.547056112  |
| H | -0.998707073 | 4.731003338  | 1.733732123  |
| O | -3.031856219 | 2.048767146  | 0.716246053  |
| H | -3.834117276 | 1.816593131  | 1.164605082  |
| H | -2.634817190 | 2.773471197  | 1.196510089  |
| O | -0.986562068 | -2.490214178 | -1.246802089 |
| H | -0.086706004 | -2.765346199 | -1.404729101 |
| H | -1.402884099 | -3.178712229 | -0.744633052 |
| O | 4.804972348  | 3.635352264  | 2.879658206  |
| H | 5.070462368  | 3.608760260  | 3.788691272  |
| H | 5.355823385  | 3.013705217  | 2.414794175  |
| O | 5.897555422  | 1.539101112  | 1.150562083  |
| H | 5.003932362  | 1.435003104  | 0.840745060  |
| H | 6.452144466  | 1.607066113  | 0.385298030  |
| O | 1.923135138  | -2.582725188 | -1.583203114 |
| H | 2.317628168  | -2.567490186 | -2.444150177 |
| H | 1.853648133  | -1.680706123 | -1.287718095 |

LIIC path connecting S1-MIN and S<sub>1</sub>/S<sub>0</sub>

Coord\_1

|   |             |             |              |
|---|-------------|-------------|--------------|
| C | 2.035513145 | 2.228362162 | 0.822884058  |
| N | 0.743864051 | 2.020331145 | 0.603730042  |
| C | 0.531622037 | 0.899398066 | -0.138366007 |
| C | 2.709915195 | 0.898875065 | -0.956046067 |
| N | 3.027953219 | 1.569674110 | 0.231588015  |
| N | 1.513038111 | 0.214646013 | -0.739703051 |
| H | 3.504027251 | 0.343978023 | -1.430275101 |

|   |              |              |              |
|---|--------------|--------------|--------------|
| N | -0.697489048 | 0.429476032  | -0.223432017 |
| H | -0.869588062 | -0.433855032 | -0.709117051 |
| H | -1.465534107 | 0.936715069  | 0.183437013  |
| H | 2.325074168  | 2.974204215  | 1.549250112  |
| O | -1.184937083 | 3.828100277  | 1.953210139  |
| H | -0.504848034 | 3.293568236  | 1.547056112  |
| H | -0.998707073 | 4.731003338  | 1.733732123  |
| O | -3.031856219 | 2.048767146  | 0.716246053  |
| H | -3.834117276 | 1.816593131  | 1.164605082  |
| H | -2.634817190 | 2.773471197  | 1.196510089  |
| O | -0.986562068 | -2.490214178 | -1.246802089 |
| H | -0.086706004 | -2.765346199 | -1.404729101 |
| H | -1.402884099 | -3.178712229 | -0.744633052 |
| O | 4.804972348  | 3.635352264  | 2.879658206  |
| H | 5.070462368  | 3.608760260  | 3.788691272  |
| H | 5.355823385  | 3.013705217  | 2.414794175  |
| O | 5.897555422  | 1.539101112  | 1.150562083  |
| H | 5.003932362  | 1.435003104  | 0.840745060  |
| H | 6.452144466  | 1.607066113  | 0.385298030  |
| O | 1.923135138  | -2.582725188 | -1.583203114 |
| H | 2.317628168  | -2.567490186 | -2.444150177 |
| H | 1.853648133  | -1.680706123 | -1.287718095 |

Coord\_2

|   |              |              |              |
|---|--------------|--------------|--------------|
| C | 2.033514146  | 2.228713160  | 0.824324060  |
| N | 0.744010051  | 2.024792146  | 0.604183044  |
| C | 0.534017041  | 0.900373065  | -0.135852008 |
| C | 2.702719194  | 0.919611066  | -0.972993069 |
| N | 3.022953219  | 1.558868110  | 0.236478015  |
| N | 1.520749107  | 0.213621013  | -0.728006054 |
| H | 3.496536249  | 0.378456027  | -1.463626106 |
| N | -0.692782048 | 0.428067029  | -0.220390016 |
| H | -0.862899060 | -0.437321032 | -0.703497051 |
| H | -1.462320107 | 0.935385067  | 0.183941012  |
| H | 2.327811168  | 2.974613216  | 1.548831110  |
| O | -1.186982083 | 3.827912276  | 1.955205142  |
| H | -0.504940037 | 3.296145239  | 1.548659111  |
| H | -1.003175075 | 4.731767343  | 1.737618126  |
| O | -3.028457218 | 2.045101149  | 0.715499050  |
| H | -3.830754275 | 1.811398129  | 1.163031081  |
| H | -2.633303188 | 2.770566199  | 1.196227085  |
| O | -0.985957071 | -2.481038176 | -1.250668089 |
| H | -0.085830004 | -2.755976201 | -1.408130103 |
| H | -1.403479100 | -3.171434227 | -0.752103055 |
| O | 4.798910347  | 3.633177260  | 2.869689205  |
| H | 5.065248363  | 3.611546262  | 3.778620273  |
| H | 5.349465383  | 3.009159219  | 2.407561174  |

|   |             |              |              |
|---|-------------|--------------|--------------|
| O | 5.893078424 | 1.528245109  | 1.153200085  |
| H | 5.000204361 | 1.411953101  | 0.845680061  |
| H | 6.446629466 | 1.589923115  | 0.386561028  |
| O | 1.921424139 | -2.583295186 | -1.571045113 |
| H | 2.332380169 | -2.571450183 | -2.424293177 |
| H | 1.863507133 | -1.681766123 | -1.270877093 |

Coord\_3

|   |              |              |              |
|---|--------------|--------------|--------------|
| C | 2.031226148  | 2.229422163  | 0.825833057  |
| N | 0.743756052  | 2.029807148  | 0.604696044  |
| C | 0.536178036  | 0.901777067  | -0.133231009 |
| C | 2.694185194  | 0.941458069  | -0.989192069 |
| N | 3.017155220  | 1.547891111  | 0.241273017  |
| N | 1.528656111  | 0.213443014  | -0.715808053 |
| H | 3.487335249  | 0.414365032  | -1.496242110 |
| N | -0.688235050 | 0.426940030  | -0.217376018 |
| H | -0.856189061 | -0.440558031 | -0.697841051 |
| H | -1.459387105 | 0.934268069  | 0.184249014  |
| H | 2.330389166  | 2.975319212  | 1.548459114  |
| O | -1.190003087 | 3.828121275  | 1.956787139  |
| H | -0.505877035 | 3.299186235  | 1.550007111  |
| H | -1.008719074 | 4.732924341  | 1.741037124  |
| O | -3.025574218 | 2.041475147  | 0.714214049  |
| H | -3.827940275 | 1.806167132  | 1.160814083  |
| H | -2.632485191 | 2.767795200  | 1.195402087  |
| O | -0.983868069 | -2.472264179 | -1.254036090 |
| H | -0.083274004 | -2.746495196 | -1.410830102 |
| H | -1.402294103 | -3.164752227 | -0.759140055 |
| O | 4.794143344  | 3.629327263  | 2.859884207  |
| H | 5.062160365  | 3.612406260  | 3.768435272  |
| H | 5.343857385  | 3.002945218  | 2.399863175  |
| O | 5.887928423  | 1.515965107  | 1.154570082  |
| H | 4.995577357  | 1.387759102  | 0.850342060  |
| H | 6.439767466  | 1.571438112  | 0.386154027  |
| O | 1.921151136  | -2.582743186 | -1.558120113 |
| H | 2.348440169  | -2.574294183 | -2.403329174 |
| H | 1.874216136  | -1.681979122 | -1.253049090 |

Coord\_4

|   |              |             |              |
|---|--------------|-------------|--------------|
| C | 2.028658146  | 2.230510162 | 0.827392061  |
| N | 0.743112054  | 2.035401145 | 0.605264042  |
| C | 0.538116037  | 0.903632066 | -0.130508011 |
| C | 2.684285193  | 0.964436067 | -1.004613072 |
| N | 3.010530217  | 1.536743109 | 0.245948017  |
| N | 1.536777108  | 0.214155016 | -0.703105052 |
| H | 3.476385248  | 0.451755035 | -1.528110111 |
| N | -0.683832052 | 0.426108031 | -0.214393014 |

|   |              |              |              |
|---|--------------|--------------|--------------|
| H | -0.849434061 | -0.443556031 | -0.692147051 |
| H | -1.456723105 | 0.933370066  | 0.184354013  |
| H | 2.332827170  | 2.976346213  | 1.548099109  |
| O | -1.194016087 | 3.828737274  | 1.957938141  |
| H | -0.507673036 | 3.302709238  | 1.551087114  |
| H | -1.015367075 | 4.734484340  | 1.743966125  |
| O | -3.023205218 | 2.037881144  | 0.712382053  |
| H | -3.825671274 | 1.800889129  | 1.157943084  |
| H | -2.632369190 | 2.765154198  | 1.194023088  |
| O | -0.980256070 | -2.463894177 | -1.256856091 |
| H | -0.079003004 | -2.736898196 | -1.412780099 |
| H | -1.399276099 | -3.158667228 | -0.765680056 |
| O | 4.790654346  | 3.623730261  | 2.850266204  |
| H | 5.061203364  | 3.611246261  | 3.758153268  |
| H | 5.338973386  | 2.994991218  | 2.391700171  |
| O | 5.882065425  | 1.502204106  | 1.154628085  |
| H | 4.990006359  | 1.362379099  | 0.854691061  |
| H | 6.431496462  | 1.551578111  | 0.384021030  |
| O | 1.922362137  | -2.581041188 | -1.544394112 |
| H | 2.365844168  | -2.575971183 | -2.381229171 |
| H | 1.885806134  | -1.681300119 | -1.234213089 |

Coord\_5

|   |              |              |              |
|---|--------------|--------------|--------------|
| C | 2.025821147  | 2.231997160  | 0.828978058  |
| N | 0.742084053  | 2.041598149  | 0.605879041  |
| C | 0.539843039  | 0.905960065  | -0.127687009 |
| C | 2.672989190  | 0.988567073  | -1.019222073 |
| N | 3.003046216  | 1.525423108  | 0.250475017  |
| N | 1.545129113  | 0.215803017  | -0.689890052 |
| H | 3.463640247  | 0.490681033  | -1.559216113 |
| N | -0.679556051 | 0.425581029  | -0.211445015 |
| H | -0.842609061 | -0.446304033 | -0.686417051 |
| H | -1.454316105 | 0.932696068  | 0.184250014  |
| H | 2.335144167  | 2.977723212  | 1.547718112  |
| O | -1.199041085 | 3.829772276  | 1.958638142  |
| H | -0.510341037 | 3.306731239  | 1.551881113  |
| H | -1.023145076 | 4.736459341  | 1.746383126  |
| O | -3.021346219 | 2.034310145  | 0.709988050  |
| H | -3.823940277 | 1.795548127  | 1.154405085  |
| H | -2.632959191 | 2.762639198  | 1.192073086  |
| O | -0.975084071 | -2.455928176 | -1.259073090 |
| H | -0.072978004 | -2.727177195 | -1.413928102 |
| H | -1.394368102 | -3.153181226 | -0.771656054 |
| O | 4.788432347  | 3.616304259  | 2.840860205  |
| H | 5.062389366  | 3.607963261  | 3.747787268  |
| H | 5.334789383  | 2.985224215  | 2.383071174  |
| O | 5.875440422  | 1.486904105  | 1.153324081  |

|   |             |              |              |
|---|-------------|--------------|--------------|
| H | 4.983434359 | 1.335769098  | 0.858687064  |
| H | 6.421738460 | 1.530309112  | 0.380106028  |
| O | 1.925104138 | -2.578159188 | -1.529835112 |
| H | 2.384628172 | -2.576426185 | -2.357962169 |
| H | 1.898303136 | -1.679675122 | -1.214347087 |

Coord\_6

|   |              |              |              |
|---|--------------|--------------|--------------|
| C | 2.022724148  | 2.233902161  | 0.830569061  |
| N | 0.740681056  | 2.048421149  | 0.606533046  |
| C | 0.541370038  | 0.908784067  | -0.124773010 |
| C | 2.660262192  | 1.013874070  | -1.032981073 |
| N | 2.994668213  | 1.513931108  | 0.254827019  |
| N | 1.553732111  | 0.218436018  | -0.676157050 |
| H | 3.449049248  | 0.531199039  | -1.589538112 |
| N | -0.675389050 | 0.425373030  | -0.208535016 |
| H | -0.835686062 | -0.448790034 | -0.680648050 |
| H | -1.452151104 | 0.932249067  | 0.183927015  |
| H | 2.337361166  | 2.979475217  | 1.547277112  |
| O | -1.205097085 | 3.831234276  | 1.958865144  |
| H | -0.513897039 | 3.311265240  | 1.552371110  |
| H | -1.032084076 | 4.738859339  | 1.748260123  |
| O | -3.019992218 | 2.030752148  | 0.707018053  |
| H | -3.822740278 | 1.790127130  | 1.150184081  |
| H | -2.634260189 | 2.760244200  | 1.189532088  |
| O | -0.968305072 | -2.448366175 | -1.260630088 |
| H | -0.065155007 | -2.717321194 | -1.414218102 |
| H | -1.387507102 | -3.148290226 | -0.776998056 |
| O | 4.787471345  | 3.606964259  | 2.831689204  |
| H | 5.065737365  | 3.602446260  | 3.737345267  |
| H | 5.331279382  | 2.973563212  | 2.373975173  |
| O | 5.867996422  | 1.470004105  | 1.150606084  |
| H | 4.975803358  | 1.307885093  | 0.862292062  |
| H | 6.410404462  | 1.507598111  | 0.374349030  |
| O | 1.929426140  | -2.574059186 | -1.514401108 |
| H | 2.404833176  | -2.575600187 | -2.333491166 |
| H | 1.911741137  | -1.677049122 | -1.193423085 |

Coord\_7

|   |              |              |              |
|---|--------------|--------------|--------------|
| C | 2.019376144  | 2.236247163  | 0.832139061  |
| N | 0.738909053  | 2.055898148  | 0.607218045  |
| C | 0.542713037  | 0.912127065  | -0.121772009 |
| C | 2.646070192  | 1.040381077  | -1.045845076 |
| N | 2.985357213  | 1.502267110  | 0.258976017  |
| N | 1.562603112  | 0.222107016  | -0.661899047 |
| H | 3.432555248  | 0.573372043  | -1.619047115 |
| N | -0.671311046 | 0.425494032  | -0.205668013 |
| H | -0.828634061 | -0.451007032 | -0.674840050 |

|   |              |              |              |
|---|--------------|--------------|--------------|
| H | -1.450213103 | 0.932032067  | 0.183377014  |
| H | 2.339500169  | 2.981632212  | 1.546735113  |
| O | -1.212205089 | 3.833132276  | 1.958592141  |
| H | -0.518356040 | 3.316330239  | 1.552535112  |
| H | -1.042215073 | 4.741690342  | 1.749566128  |
| O | -3.019139216 | 2.027194145  | 0.703454050  |
| H | -3.822062274 | 1.784604128  | 1.145263082  |
| H | -2.636276190 | 2.757961197  | 1.186381086  |
| O | -0.959874067 | -2.441202173 | -1.261468088 |
| H | -0.055491003 | -2.707314193 | -1.413592101 |
| H | -1.378628100 | -3.143991227 | -0.781632056 |
| O | 4.787771346  | 3.595618260  | 2.822779203  |
| H | 5.071276364  | 3.594573256  | 3.726835267  |
| H | 5.328421385  | 2.959924213  | 2.364407172  |
| O | 5.859666421  | 1.451442107  | 1.146422081  |
| H | 4.967042358  | 1.278681092  | 0.865467062  |
| H | 6.397389459  | 1.483408106  | 0.366687025  |
| O | 1.935376140  | -2.568703187 | -1.498051107 |
| H | 2.426498174  | -2.573427184 | -2.307780168 |
| H | 1.926153136  | -1.673361122 | -1.171413085 |

Coord\_8

|   |              |              |              |
|---|--------------|--------------|--------------|
| C | 2.015790143  | 2.239053162  | 0.833661060  |
| N | 0.736779051  | 2.064053150  | 0.607923041  |
| C | 0.543884037  | 0.916014068  | -0.118691007 |
| C | 2.630371191  | 1.068115077  | -1.057764074 |
| N | 2.975072214  | 1.490432109  | 0.262890018  |
| N | 1.571765112  | 0.226871019  | -0.647109045 |
| H | 3.414094244  | 0.617267047  | -1.647711117 |
| N | -0.667299046 | 0.425956030  | -0.202850012 |
| H | -0.821421058 | -0.452943033 | -0.668994049 |
| H | -1.448485107 | 0.932047070  | 0.182589011  |
| H | 2.341583170  | 2.984219217  | 1.546048114  |
| O | -1.220388090 | 3.835473277  | 1.957793142  |
| H | -0.523737037 | 3.321938238  | 1.552350112  |
| H | -1.053571074 | 4.744962341  | 1.750267123  |
| O | -3.018779217 | 2.023619145  | 0.699278048  |
| H | -3.821896277 | 1.778958130  | 1.139621084  |
| H | -2.639010190 | 2.755779198  | 1.182596087  |
| O | -0.949737068 | -2.434433176 | -1.261523091 |
| H | -0.043937005 | -2.697139194 | -1.411988101 |
| H | -1.367659097 | -3.140274228 | -0.785478058 |
| O | 4.789341346  | 3.582169257  | 2.814158202  |
| H | 5.079043368  | 3.584213257  | 3.716262269  |
| H | 5.326190385  | 2.944215211  | 2.354365171  |
| O | 5.850372423  | 1.431153102  | 1.140715084  |
| H | 4.957079358  | 1.248112088  | 0.868173063  |

|   |             |              |              |
|---|-------------|--------------|--------------|
| H | 6.382577460 | 1.457705105  | 0.357058025  |
| O | 1.943009141 | -2.562044185 | -1.480739106 |
| H | 2.449669178 | -2.569837182 | -2.280787165 |
| H | 1.941574139 | -1.668546122 | -1.148287081 |

Coord\_9

|   |              |              |              |
|---|--------------|--------------|--------------|
| C | 2.011976145  | 2.242342163  | 0.835107058  |
| N | 0.734299051  | 2.072916150  | 0.608637044  |
| C | 0.544900042  | 0.920470068  | -0.115536010 |
| C | 2.613125188  | 1.097100078  | -1.068685075 |
| N | 2.963769215  | 1.478429104  | 0.266539018  |
| N | 1.581237115  | 0.232787019  | -0.631779045 |
| H | 3.393595245  | 0.662953046  | -1.675486123 |
| N | -0.663330048 | 0.426769032  | -0.200085014 |
| H | -0.814011057 | -0.454589033 | -0.663107047 |
| H | -1.446947106 | 0.932294068  | 0.181553015  |
| H | 2.343636171  | 2.987268215  | 1.545167113  |
| O | -1.229668086 | 3.838266274  | 1.956434140  |
| H | -0.530057038 | 3.328108238  | 1.551788110  |
| H | -1.066187078 | 4.748680340  | 1.750326127  |
| O | -3.018905219 | 2.020011146  | 0.694469049  |
| H | -3.822232273 | 1.773161125  | 1.133240080  |
| H | -2.642468189 | 2.753686197  | 1.178152083  |
| O | -0.937840068 | -2.428048176 | -1.260729092 |
| H | -0.030441001 | -2.686775194 | -1.409341103 |
| H | -1.354524098 | -3.137131227 | -0.788455056 |
| O | 4.792196347  | 3.566512257  | 2.805852204  |
| H | 5.089081368  | 3.571223257  | 3.705622266  |
| H | 5.324567382  | 2.926341212  | 2.343843169  |
| O | 5.840027420  | 1.409070101  | 1.133428081  |
| H | 4.945829356  | 1.216133087  | 0.870370064  |
| H | 6.365835456  | 1.430453101  | 0.345398023  |
| O | 1.952377139  | -2.554032182 | -1.462416105 |
| H | 2.474392176  | -2.564752186 | -2.252468160 |
| H | 1.958042141  | -1.662533118 | -1.124012081 |

Coord\_10

|   |              |              |              |
|---|--------------|--------------|--------------|
| C | 2.031688146  | 2.264279163  | 0.855384061  |
| N | 0.756042055  | 2.101385150  | 0.623201045  |
| C | 0.572282043  | 0.942881069  | -0.096529005 |
| C | 2.625108190  | 1.140427085  | -1.054436078 |
| N | 2.976781213  | 1.482141108  | 0.294716019  |
| N | 1.619009115  | 0.255062016  | -0.594017041 |
| H | 3.404056244  | 0.721336050  | -1.673898120 |
| N | -0.632993046 | 0.446297032  | -0.185591013 |
| H | -0.778891056 | -0.438519031 | -0.643937046 |
| H | -1.420302100 | 0.952789066  | 0.187484012  |

|   |              |              |              |
|---|--------------|--------------|--------------|
| H | 2.367134170  | 3.010282218  | 1.562671111  |
| O | -1.219495088 | 3.865492280  | 1.955738140  |
| H | -0.515543040 | 3.357187242  | 1.556284111  |
| H | -1.057741076 | 4.776184343  | 1.749504124  |
| O | -2.995314217 | 2.039110148  | 0.686934052  |
| H | -3.800974275 | 1.791770130  | 1.121160080  |
| H | -2.623802191 | 2.775198199  | 1.170816083  |
| O | -0.896030065 | -2.405912173 | -1.241652088 |
| H | 0.013506000  | -2.661313191 | -1.383723098 |
| H | -1.313764093 | -3.116905226 | -0.773223054 |
| O | 4.812966348  | 3.568537259  | 2.825701203  |
| H | 5.114213367  | 3.577260259  | 3.724006270  |
| H | 5.341484385  | 2.924589212  | 2.364425169  |
| O | 5.850140421  | 1.400177103  | 1.161846084  |
| H | 4.955701359  | 1.198042088  | 0.906002066  |
| H | 6.372034460  | 1.414289101  | 0.371180025  |
| O | 1.992265145  | -2.531771182 | -1.412996104 |
| H | 2.532767184  | -2.547615183 | -2.190398156 |
| H | 2.003736146  | -1.641610116 | -1.070561077 |

LIIC path connecting S<sub>1</sub>/S<sub>0</sub> and S0-MIN

Coord\_1

|   |              |              |              |
|---|--------------|--------------|--------------|
| C | 2.031688146  | 2.264279163  | 0.855384061  |
| N | 0.756042055  | 2.101385150  | 0.623201045  |
| C | 0.572282043  | 0.942881069  | -0.096529005 |
| C | 2.625108190  | 1.140427085  | -1.054436078 |
| N | 2.976781213  | 1.482141108  | 0.294716019  |
| N | 1.619009115  | 0.255062016  | -0.594017041 |
| H | 3.404056244  | 0.721336050  | -1.673898120 |
| N | -0.632993046 | 0.446297032  | -0.185591013 |
| H | -0.778891056 | -0.438519031 | -0.643937046 |
| H | -1.420302100 | 0.952789066  | 0.187484012  |
| H | 2.367134170  | 3.010282218  | 1.562671111  |
| O | -1.219495088 | 3.865492280  | 1.955738140  |
| H | -0.515543040 | 3.357187242  | 1.556284111  |
| H | -1.057741076 | 4.776184343  | 1.749504124  |
| O | -2.995314217 | 2.039110148  | 0.686934052  |
| H | -3.800974275 | 1.791770130  | 1.121160080  |
| H | -2.623802191 | 2.775198199  | 1.170816083  |
| O | -0.896030065 | -2.405912173 | -1.241652088 |
| H | 0.013506000  | -2.661313191 | -1.383723098 |
| H | -1.313764093 | -3.116905226 | -0.773223054 |
| O | 4.812966348  | 3.568537259  | 2.825701203  |
| H | 5.114213367  | 3.577260259  | 3.724006270  |
| H | 5.341484385  | 2.924589212  | 2.364425169  |
| O | 5.850140421  | 1.400177103  | 1.161846084  |
| H | 4.955701359  | 1.198042088  | 0.906002066  |



|   |             |              |              |
|---|-------------|--------------|--------------|
| H | 6.372034460 | 1.414289101  | 0.371180025  |
| O | 1.992265145 | -2.531771182 | -1.412996104 |
| H | 2.532767184 | -2.547615183 | -2.190398156 |
| H | 2.003736146 | -1.641610116 | -1.070561077 |

Coord\_2

|   |              |              |              |
|---|--------------|--------------|--------------|
| C | 2.039210146  | 2.241906163  | 0.835436058  |
| N | 0.763860056  | 2.070970148  | 0.605297041  |
| C | 0.559429042  | 0.933004065  | -0.131913008 |
| C | 2.659155190  | 1.044187074  | -1.033839076 |
| N | 2.999187218  | 1.482991109  | 0.279687020  |
| N | 1.579533111  | 0.224193017  | -0.653091045 |
| H | 3.440262249  | 0.602296046  | -1.634399119 |
| N | -0.660698047 | 0.467681032  | -0.238112019 |
| H | -0.818988059 | -0.413801030 | -0.697505050 |
| H | -1.433229101 | 0.975920071  | 0.160958013  |
| H | 2.366082171  | 2.992370214  | 1.541609110  |
| O | -1.156831082 | 3.849542280  | 1.995930142  |
| H | -0.470788032 | 3.334604238  | 1.575233112  |
| H | -0.982658069 | 4.760079342  | 1.799281129  |
| O | -2.989642215 | 2.074509148  | 0.727681054  |
| H | -3.788939271 | 1.827581131  | 1.173654087  |
| H | -2.598271188 | 2.794531203  | 1.219570088  |
| O | -0.906530063 | -2.428988175 | -1.240884088 |
| H | 0.001353000  | -2.687246194 | -1.385602101 |
| H | -1.324951096 | -3.138311224 | -0.770428056 |
| O | 4.725694341  | 3.589980257  | 2.804832204  |
| H | 4.977229359  | 3.591415259  | 3.718301268  |
| H | 5.281450380  | 2.952341214  | 2.367455169  |
| O | 5.858841423  | 1.442970106  | 1.175842087  |
| H | 4.981286359  | 1.255955088  | 0.864699062  |
| H | 6.422420464  | 1.470985104  | 0.412046029  |
| O | 1.989466141  | -2.534976181 | -1.451757105 |
| H | 2.496797180  | -2.549269185 | -2.244559161 |
| H | 1.971983141  | -1.644728119 | -1.122730080 |

Coord\_3

|   |              |              |              |
|---|--------------|--------------|--------------|
| C | 2.043772147  | 2.226964161  | 0.817150057  |
| N | 0.768765053  | 2.046607145  | 0.588770042  |
| C | 0.547909039  | 0.926427064  | -0.162147011 |
| C | 2.686435193  | 0.954500071  | -1.001791070 |
| N | 3.016552217  | 1.487455106  | 0.267718020  |
| N | 1.546393111  | 0.201640017  | -0.701404049 |
| H | 3.469803252  | 0.490116036  | -1.582041115 |
| N | -0.684618049 | 0.489091035  | -0.286436019 |
| H | -0.852018060 | -0.390968026 | -0.744066054 |
| H | -1.445235106 | 0.996545071  | 0.134415011  |

|   |              |              |              |
|---|--------------|--------------|--------------|
| H | 2.361089172  | 2.984295217  | 1.519988108  |
| O | -1.109949079 | 3.835922279  | 2.025764144  |
| H | -0.438804030 | 3.316415241  | 1.587819117  |
| H | -0.926541065 | 4.746114344  | 1.835967130  |
| O | -2.987778214 | 2.101114153  | 0.760093055  |
| H | -3.780892274 | 1.852423135  | 1.215933090  |
| H | -2.581118188 | 2.807928203  | 1.258257088  |
| O | -0.917029067 | -2.452063176 | -1.240115088 |
| H | -0.010801000 | -2.713178197 | -1.387481098 |
| H | -1.336137094 | -3.159716227 | -0.767632053 |
| O | 4.670468334  | 3.604642261  | 2.796899202  |
| H | 4.885809353  | 3.593379258  | 3.719460267  |
| H | 5.243054379  | 2.972756216  | 2.373126171  |
| O | 5.864319424  | 1.481519107  | 1.179585085  |
| H | 4.999194358  | 1.315560094  | 0.828184059  |
| H | 6.456984464  | 1.525766110  | 0.437409029  |
| O | 1.986666142  | -2.538180185 | -1.490519105 |
| H | 2.460827177  | -2.550922186 | -2.298720167 |
| H | 1.940230140  | -1.647846121 | -1.174898082 |

Coord\_4

|   |              |              |              |
|---|--------------|--------------|--------------|
| C | 2.046679150  | 2.217726160  | 0.800811059  |
| N | 0.771929057  | 2.027275146  | 0.573927044  |
| C | 0.537965036  | 0.922521064  | -0.187878011 |
| C | 2.707573194  | 0.871464064  | -0.959152068 |
| N | 3.030243218  | 1.494006108  | 0.258396018  |
| N | 1.519570111  | 0.185789015  | -0.740264053 |
| H | 3.493019252  | 0.385100027  | -1.518146111 |
| N | -0.704914050 | 0.510438035  | -0.331454022 |
| H | -0.878849061 | -0.369774028 | -0.785070057 |
| H | -1.456233103 | 1.015129072  | 0.107606008  |
| H | 2.353817171  | 2.983583215  | 1.498610109  |
| O | -1.076521079 | 3.824751273  | 2.047732149  |
| H | -0.417505032 | 3.302271238  | 1.595906115  |
| H | -0.886576065 | 4.734608342  | 1.862745134  |
| O | -2.989356216 | 2.120649155  | 0.785132056  |
| H | -3.776587274 | 1.868384137  | 1.249054087  |
| H | -2.571285186 | 2.816734205  | 1.288494091  |
| O | -0.927529065 | -2.475138178 | -1.239347087 |
| H | -0.022954000 | -2.739110200 | -1.389360101 |
| H | -1.347323096 | -3.181121229 | -0.764837055 |
| O | 4.639086335  | 3.613367261  | 2.798525200  |
| H | 4.829922346  | 3.586635259  | 3.726103267  |
| H | 5.221449374  | 2.987028217  | 2.379905170  |
| O | 5.868634425  | 1.515890112  | 1.174095082  |
| H | 5.011200363  | 1.374308098  | 0.795165055  |
| H | 6.480336469  | 1.578329111  | 0.448406031  |

|   |             |              |              |
|---|-------------|--------------|--------------|
| O | 1.983866144 | -2.541383184 | -1.529279111 |
| H | 2.424856174 | -2.552575182 | -2.352880167 |
| H | 1.908477140 | -1.650963118 | -1.227067090 |

Coord\_5

|   |              |              |              |
|---|--------------|--------------|--------------|
| C | 2.048711148  | 2.213043158  | 0.786607058  |
| N | 0.774033055  | 2.012247147  | 0.560913041  |
| C | 0.529658038  | 0.920877064  | -0.209629016 |
| C | 2.722943194  | 0.795367058  | -0.906728066 |
| N | 3.041257217  | 1.501744108  | 0.251509019  |
| N | 1.498892108  | 0.175561014  | -0.770662053 |
| H | 3.510093252  | 0.287692022  | -1.443900103 |
| N | -0.721780051 | 0.531671039  | -0.373836029 |
| H | -0.900182064 | -0.350010025 | -0.821552061 |
| H | -1.466223107 | 1.031974075  | 0.080340007  |
| H | 2.345239171  | 2.988543214  | 1.478050107  |
| O | -1.054978077 | 3.815952272  | 2.063589147  |
| H | -0.405503028 | 3.291799238  | 1.600774117  |
| H | -0.860845064 | 4.725598343  | 1.881870134  |
| O | -2.994168215 | 2.134237156  | 0.803517060  |
| H | -3.775879272 | 1.876835135  | 1.273830092  |
| H | -2.568080187 | 2.821773205  | 1.311454097  |
| O | -0.938029069 | -2.498213179 | -1.238578087 |
| H | -0.035108000 | -2.765042197 | -1.391239098 |
| H | -1.358509099 | -3.202526232 | -0.762041057 |
| O | 4.626572335  | 3.616720261  | 2.806970202  |
| H | 4.802864344  | 3.573254255  | 3.736746270  |
| H | 5.213633373  | 2.995938218  | 2.386669172  |
| O | 5.872990421  | 1.546222112  | 1.160530084  |
| H | 5.018682363  | 1.430783101  | 0.764905054  |
| H | 6.495665469  | 1.628392115  | 0.446686030  |
| O | 1.981066140  | -2.544587183 | -1.568040112 |
| H | 2.388886170  | -2.554228184 | -2.407041173 |
| H | 1.876724134  | -1.654081120 | -1.279235093 |

Coord\_6

|   |              |              |              |
|---|--------------|--------------|--------------|
| C | 2.050240148  | 2.212099159  | 0.774719054  |
| N | 0.775378054  | 2.000964147  | 0.549774039  |
| C | 0.522893036  | 0.921190067  | -0.227846017 |
| C | 2.732736196  | 0.726581054  | -0.845194060 |
| N | 3.050268221  | 1.510138109  | 0.247052019  |
| N | 1.484080108  | 0.170197014  | -0.793328059 |
| H | 3.521094254  | 0.198378015  | -1.360304100 |
| N | -0.735465051 | 0.552732040  | -0.414153028 |
| H | -0.916636068 | -0.331518026 | -0.854335062 |
| H | -1.475310107 | 1.047257074  | 0.052384002  |
| H | 2.335800167  | 2.997957214  | 1.458813107  |

|   |              |              |              |
|---|--------------|--------------|--------------|
| O | -1.044343075 | 3.809301276  | 2.074540147  |
| H | -0.401955027 | 3.284586235  | 1.603284115  |
| H | -0.848107059 | 4.718927339  | 1.894925138  |
| O | -3.002175217 | 2.142598157  | 0.815670060  |
| H | -3.778768273 | 1.878665135  | 1.290742094  |
| H | -2.571129185 | 2.823513204  | 1.327895094  |
| O | -0.948528067 | -2.521288181 | -1.237810087 |
| H | -0.047261005 | -2.790974200 | -1.393118101 |
| H | -1.369696096 | -3.223931230 | -0.759245054 |
| O | 4.630394334  | 3.615248259  | 2.820349205  |
| H | 4.800865345  | 3.554655257  | 3.750209270  |
| H | 5.218082378  | 3.000125216  | 2.392702173  |
| O | 5.878063421  | 1.572704116  | 1.139899082  |
| H | 5.022635359  | 1.484241105  | 0.737165054  |
| H | 6.504955467  | 1.675676119  | 0.433689029  |
| O | 1.978266142  | -2.547791182 | -1.606801117 |
| H | 2.352915167  | -2.555882186 | -2.461201178 |
| H | 1.844971134  | -1.657199117 | -1.331404095 |

Coord\_7

|   |              |              |              |
|---|--------------|--------------|--------------|
| C | 2.051273149  | 2.214237162  | 0.765438058  |
| N | 0.775934055  | 1.992924145  | 0.540533038  |
| C | 0.517428038  | 0.923193066  | -0.242921018 |
| C | 2.736986199  | 0.665489048  | -0.774998057 |
| N | 3.057656218  | 1.518832110  | 0.245317016  |
| N | 1.474774108  | 0.169144014  | -0.808744056 |
| H | 3.525976253  | 0.117618010  | -1.268078089 |
| N | -0.746290054 | 0.573557043  | -0.452995035 |
| H | -0.928810066 | -0.314174025 | -0.884211066 |
| H | -1.483725105 | 1.061069077  | 0.023358000  |
| H | 2.325478168  | 3.010839219  | 1.441497104  |
| O | -1.044172077 | 3.804430274  | 2.081370148  |
| H | -0.406501030 | 3.280148237  | 1.603991117  |
| H | -0.847682061 | 4.714265340  | 1.903019137  |
| O | -3.013532218 | 2.146190154  | 0.821616059  |
| H | -3.785465270 | 1.874453133  | 1.299797095  |
| H | -2.580373186 | 2.822182201  | 1.338134097  |
| O | -0.959028071 | -2.544363182 | -1.237041086 |
| H | -0.059415005 | -2.816906203 | -1.394997098 |
| H | -1.380882099 | -3.245336232 | -0.756450056 |
| O | 4.650054332  | 3.609551258  | 2.837726206  |
| H | 4.823046349  | 3.532039253  | 3.765817274  |
| H | 5.234604376  | 3.000256214  | 2.397647171  |
| O | 5.884224426  | 1.595663116  | 1.112920081  |
| H | 5.023666361  | 1.534288112  | 0.712310053  |
| H | 6.509048468  | 1.720019124  | 0.410107029  |
| O | 1.975466143  | -2.550995186 | -1.645563118 |

|   |             |              |              |
|---|-------------|--------------|--------------|
| H | 2.316945169 | -2.557535182 | -2.515362179 |
| H | 1.813218128 | -1.660316119 | -1.383572098 |

Coord\_8

|   |              |              |              |
|---|--------------|--------------|--------------|
| C | 2.051334148  | 2.218742159  | 0.759439056  |
| N | 0.775231054  | 1.987564146  | 0.533283040  |
| C | 0.512802039  | 0.926588067  | -0.255216017 |
| C | 2.735514197  | 0.612392044  | -0.696091051 |
| N | 3.063410222  | 1.527425112  | 0.247216016  |
| N | 1.470515105  | 0.171962010  | -0.817089059 |
| H | 3.524538256  | 0.045750003  | -1.167380082 |
| N | -0.754705052 | 0.594089041  | -0.491180036 |
| H | -0.937348066 | -0.297826020 | -0.912249067 |
| H | -1.491919107 | 1.073460080  | -0.007526001 |
| H | 2.313628164  | 3.026157218  | 1.427154104  |
| O | -1.054750076 | 3.800742273  | 2.084482149  |
| H | -0.419419029 | 3.277824233  | 1.603219117  |
| H | -0.859575060 | 4.711030337  | 1.906922137  |
| O | -3.028750218 | 2.145315154  | 0.820610062  |
| H | -3.796634276 | 1.864592132  | 1.300047094  |
| H | -2.596248186 | 2.817811202  | 1.341797094  |
| O | -0.969527070 | -2.567438184 | -1.236273092 |
| H | -0.071568006 | -2.842838206 | -1.396876101 |
| H | -1.392068102 | -3.266741235 | -0.753654053 |
| O | 4.687603337  | 3.600324259  | 2.859506205  |
| H | 4.872840351  | 3.506829255  | 3.783709275  |
| H | 5.264846380  | 2.997318217  | 2.401515171  |
| O | 5.891705426  | 1.615895118  | 1.079780075  |
| H | 5.021854363  | 1.580524112  | 0.691836048  |
| H | 6.507122469  | 1.761703125  | 0.374865025  |
| O | 1.972666144  | -2.554199185 | -1.684324124 |
| H | 2.280975166  | -2.559188183 | -2.569523184 |
| H | 1.781465128  | -1.663434122 | -1.435741106 |

Coord\_9

|   |              |              |              |
|---|--------------|--------------|--------------|
| C | 2.048792149  | 2.224226161  | 0.758840053  |
| N | 0.771775056  | 1.983874145  | 0.528548036  |
| C | 0.508000036  | 0.930889066  | -0.265091020 |
| C | 2.727615195  | 0.567121041  | -0.606909042 |
| N | 3.066615221  | 1.534822110  | 0.255700018  |
| N | 1.470582104  | 0.178141012  | -0.817923058 |
| H | 3.516202254  | -0.017416001 | -1.056542077 |
| N | -0.761514055 | 0.614386042  | -0.530508040 |
| H | -0.943111070 | -0.282079023 | -0.940864067 |
| H | -1.500971108 | 1.084549079  | -0.042491002 |
| H | 2.298093166  | 3.042026217  | 1.418657100  |
| O | -1.078194078 | 3.796993275  | 2.083712149  |

|   |              |              |              |
|---|--------------|--------------|--------------|
| H | -0.442562030 | 3.276357238  | 1.601080113  |
| H | -0.885352062 | 4.707994341  | 1.907193139  |
| O | -3.049419220 | 2.140292156  | 0.809553056  |
| H | -3.814397274 | 1.849473131  | 1.287545091  |
| H | -2.620576189 | 2.810230204  | 1.336605098  |
| O | -0.980027068 | -2.590514185 | -1.235504091 |
| H | -0.083721006 | -2.868770204 | -1.398755103 |
| H | -1.403254099 | -3.288146238 | -0.750859055 |
| O | 4.751160340  | 3.588404256  | 2.889493209  |
| H | 4.965395357  | 3.481839251  | 3.805936275  |
| H | 5.315098385  | 2.993638217  | 2.404949171  |
| O | 5.900816424  | 1.636085120  | 1.039175077  |
| H | 5.016026359  | 1.621549118  | 0.680803046  |
| H | 6.493522465  | 1.802818128  | 0.321192021  |
| O | 1.969866141  | -2.557403184 | -1.723085124 |
| H | 2.245004162  | -2.560841185 | -2.623683190 |
| H | 1.749712128  | -1.666551119 | -1.487909108 |

Coord\_10

|   |              |              |              |
|---|--------------|--------------|--------------|
| C | 2.010404145  | 2.225413158  | 0.765495055  |
| N | 0.733465052  | 1.970661140  | 0.527942038  |
| C | 0.473481037  | 0.886914066  | -0.219420018 |
| C | 2.683538196  | 0.459482034  | -0.411087028 |
| N | 3.035677217  | 1.507145108  | 0.318932022  |
| N | 1.446775102  | 0.107636007  | -0.709087052 |
| H | 3.471976249  | -0.166874013 | -0.800625058 |
| N | -0.794624056 | 0.576531040  | -0.514996040 |
| H | -0.974985073 | -0.343057027 | -0.869526064 |
| H | -1.541119113 | 1.064285077  | -0.057112005 |
| H | 2.243360162  | 3.084142222  | 1.377352101  |
| O | -1.151952084 | 3.867401276  | 1.967531141  |
| H | -0.511431036 | 3.323101237  | 1.519413109  |
| H | -0.955890071 | 4.768363342  | 1.748159125  |
| O | -3.108885222 | 2.151434157  | 0.743146053  |
| H | -3.878275281 | 1.877573136  | 1.223994089  |
| H | -2.688481193 | 2.843955204  | 1.246873089  |
| O | -0.991563074 | -2.610662186 | -1.235090089 |
| H | -0.096889005 | -2.891674207 | -1.401037101 |
| H | -1.415368104 | -3.306666240 | -0.748383056 |
| O | 4.834936348  | 3.676631264  | 2.879494209  |
| H | 5.122060367  | 3.616109262  | 3.780013273  |
| H | 5.373438388  | 3.071854219  | 2.378706171  |
| O | 5.880408423  | 1.667978119  | 1.026812073  |
| H | 4.971025359  | 1.635707118  | 0.740742054  |
| H | 6.411359463  | 1.811739131  | 0.255726017  |
| O | 1.965991140  | -2.557345186 | -1.762375127 |
| H | 2.207905159  | -2.559217182 | -2.678387195 |

H 1.716794122 -1.666433123 -1.540605113

LIIC path connecting S1-MIN and T1-MIN

Coord\_1

|   |              |              |              |
|---|--------------|--------------|--------------|
| C | 2.035513145  | 2.228362162  | 0.822884058  |
| N | 0.743864051  | 2.020331145  | 0.603730042  |
| C | 0.531622037  | 0.899398066  | -0.138366007 |
| C | 2.709915195  | 0.898875065  | -0.956046067 |
| N | 3.027953219  | 1.569674110  | 0.231588015  |
| N | 1.513038111  | 0.214646013  | -0.739703051 |
| H | 3.504027251  | 0.343978023  | -1.430275101 |
| N | -0.697489048 | 0.429476032  | -0.223432017 |
| H | -0.869588062 | -0.433855032 | -0.709117051 |
| H | -1.465534107 | 0.936715069  | 0.183437013  |
| H | 2.325074168  | 2.974204215  | 1.549250112  |
| O | -1.184937083 | 3.828100277  | 1.953210139  |
| H | -0.504848034 | 3.293568236  | 1.547056112  |
| H | -0.998707073 | 4.731003338  | 1.733732123  |
| O | -3.031856219 | 2.048767146  | 0.716246053  |
| H | -3.834117276 | 1.816593131  | 1.164605082  |
| H | -2.634817190 | 2.773471197  | 1.196510089  |
| O | -0.986562068 | -2.490214178 | -1.246802089 |
| H | -0.086706004 | -2.765346199 | -1.404729101 |
| H | -1.402884099 | -3.178712229 | -0.744633052 |
| O | 4.804972348  | 3.635352264  | 2.879658206  |
| H | 5.070462368  | 3.608760260  | 3.788691272  |
| H | 5.355823385  | 3.013705217  | 2.414794175  |
| O | 5.897555422  | 1.539101112  | 1.150562083  |
| H | 5.003932362  | 1.435003104  | 0.840745060  |
| H | 6.452144466  | 1.607066113  | 0.385298030  |
| O | 1.923135138  | -2.582725188 | -1.583203114 |
| H | 2.317628168  | -2.567490186 | -2.444150177 |
| H | 1.853648133  | -1.680706123 | -1.287718095 |

Coord\_2

|   |              |              |              |
|---|--------------|--------------|--------------|
| C | 2.050425148  | 2.209218159  | 0.834670058  |
| N | 0.750311055  | 2.008410147  | 0.595167044  |
| C | 0.534138037  | 0.870903062  | -0.134194011 |
| C | 2.709376196  | 0.886278064  | -0.948953071 |
| N | 3.039621217  | 1.570393114  | 0.225763017  |
| N | 1.506973110  | 0.206375015  | -0.757705053 |
| H | 3.501404251  | 0.342724027  | -1.438762104 |
| N | -0.694055052 | 0.383691029  | -0.175619011 |
| H | -0.864896064 | -0.478914036 | -0.662899049 |
| H | -1.457980108 | 0.912811064  | 0.209970013  |
| H | 2.333712166  | 2.937547212  | 1.580301111  |
| O | -1.159218084 | 3.836185274  | 1.944807143  |

|   |              |              |              |
|---|--------------|--------------|--------------|
| H | -0.480973033 | 3.310512237  | 1.525822107  |
| H | -0.969462071 | 4.744343341  | 1.751299125  |
| O | -3.023671217 | 2.065795149  | 0.709972053  |
| H | -3.833160275 | 1.844412132  | 1.150793085  |
| H | -2.624919189 | 2.789134198  | 1.190248085  |
| O | -0.999046074 | -2.487914178 | -1.254244088 |
| H | -0.099798008 | -2.761758198 | -1.417328103 |
| H | -1.413414101 | -3.180711228 | -0.756405055 |
| O | 4.772411341  | 3.654173262  | 2.878284208  |
| H | 5.039751365  | 3.638937259  | 3.787043271  |
| H | 5.332462384  | 3.037580218  | 2.417485174  |
| O | 5.896542423  | 1.565120112  | 1.164693084  |
| H | 5.009897359  | 1.459568105  | 0.836421058  |
| H | 6.468203466  | 1.622866118  | 0.410857031  |
| O | 1.910659139  | -2.583965188 | -1.610533113 |
| H | 2.295658167  | -2.578505185 | -2.476135180 |
| H | 1.841325134  | -1.678098121 | -1.326991096 |

Coord\_3

|   |              |              |              |
|---|--------------|--------------|--------------|
| C | 2.066421150  | 2.191063157  | 0.846635062  |
| N | 0.757829055  | 1.999240145  | 0.586590044  |
| C | 0.537083041  | 0.845213062  | -0.129199012 |
| C | 2.708098196  | 0.875387061  | -0.941901070 |
| N | 3.051175221  | 1.571878112  | 0.219846016  |
| N | 1.500309107  | 0.200540016  | -0.774447057 |
| H | 3.497325252  | 0.343062023  | -1.447544102 |
| N | -0.689036050 | 0.342250027  | -0.126192010 |
| H | -0.860257064 | -0.519596040 | -0.614547044 |
| H | -1.449874107 | 0.891282064  | 0.236311017  |
| H | 2.343663170  | 2.901016207  | 1.611337114  |
| O | -1.140624081 | 3.847101275  | 1.936010137  |
| H | -0.462603031 | 3.331644237  | 1.505686109  |
| H | -0.948273068 | 4.760004342  | 1.768881129  |
| O | -3.016787219 | 2.081986152  | 0.700024050  |
| H | -3.833663274 | 1.869830135  | 1.131723082  |
| H | -2.618638189 | 2.804765200  | 1.181012085  |
| O | -1.009759072 | -2.492498181 | -1.257910091 |
| H | -0.110496009 | -2.761820201 | -1.427870102 |
| H | -1.419388100 | -3.191921229 | -0.765466056 |
| O | 4.745426339  | 3.668572265  | 2.878370210  |
| H | 5.015769359  | 3.663367262  | 3.786359273  |
| H | 5.313142382  | 3.056986222  | 2.420066172  |
| O | 5.895763427  | 1.587748112  | 1.176156085  |
| H | 5.015698359  | 1.482321107  | 0.830868062  |
| H | 6.483099467  | 1.635966118  | 0.433492033  |
| O | 1.899632138  | -2.581913187 | -1.637878120 |
| H | 2.273665164  | -2.583195188 | -2.508468179 |



H 1.827573130 -1.673167120 -1.364117097

Coord\_4

C 2.083612150 2.173604155 0.858857062  
N 0.766587055 1.992482144 0.578062040  
C 0.540612039 0.822002057 -0.123265008  
C 2.706231195 0.866126063 -0.934897065  
N 3.062770219 1.574012115 0.213865017  
N 1.493200108 0.196896017 -0.789923057  
H 3.491967253 0.345045024 -1.456694106  
N -0.682277049 0.304907020 -0.074965006  
H -0.855571062 -0.556097041 -0.563937040  
H -1.441061104 0.871812062 0.262781019  
H 2.354887167 2.864281204 1.642488117  
O -1.129075079 3.861022277 1.926425139  
H -0.449675035 3.357140241 1.486201109  
H -0.935426067 4.778170346 1.785788130  
O -3.011160218 2.096817149 0.686850050  
H -3.835444278 1.892235134 1.108065081  
H -2.615935188 2.820024200 1.168971085  
O -1.018784073 -2.502581178 -1.258041089  
H -0.119104008 -2.764681198 -1.436480102  
H -1.421301102 -3.210552232 -0.772020054  
O 4.723518338 3.678683265 2.879789209  
H 4.997802362 3.682227266 3.786609272  
H 5.297579379 3.072069223 2.422565175  
O 5.895478422 1.607062118 1.185108086  
H 5.021625361 1.503283109 0.823970057  
H 6.497293467 1.646414120 0.453388034  
O 1.889795135 -2.576881188 -1.665289121  
H 2.251501162 -2.582304186 -2.541171185  
H 1.812629133 -1.666104123 -1.399275099

Coord\_5

C 2.102090152 2.156589153 0.871439060  
N 0.776737055 1.987864142 0.569685042  
C 0.544832037 0.801020057 -0.116240006  
C 2.703864196 0.858469064 -0.927928065  
N 3.074511223 1.576723111 0.207865014  
N 1.485726109 0.195272014 -0.804100060  
H 3.485419251 0.348774025 -1.466272103  
N -0.673670049 0.271543019 -0.021712000  
H -0.850848059 -0.588467041 -0.510905039  
H -1.431417103 0.854217061 0.289739022  
H 2.367340168 2.827037201 1.673897120  
O -1.124431083 3.878183279 1.915589139  
H -0.442130031 3.387208245 1.466833105

|   |              |              |              |
|---|--------------|--------------|--------------|
| H | -0.931085068 | 4.799106344  | 1.801239127  |
| O | -3.006747219 | 2.109913154  | 0.670929049  |
| H | -3.838315276 | 1.911185136  | 1.080544080  |
| H | -2.616737188 | 2.834692205  | 1.154301086  |
| O | -1.026096075 | -2.517321182 | -1.254891092 |
| H | -0.125777008 | -2.769812201 | -1.443327105 |
| H | -1.419374103 | -3.235467235 | -0.776326054 |
| O | 4.706223338  | 3.684537267  | 2.882432206  |
| H | 4.985155360  | 3.695529268  | 3.787778272  |
| H | 5.285493379  | 3.082871223  | 2.425019176  |
| O | 5.895869426  | 1.623084118  | 1.191688088  |
| H | 5.027910362  | 1.522489111  | 0.815596060  |
| H | 6.511173469  | 1.654235121  | 0.470761034  |
| O | 1.880945138  | -2.569043184 | -1.692865124 |
| H | 2.229006160  | -2.576300183 | -2.574304185 |
| H | 1.796605127  | -1.657020118 | -1.432637105 |

Coord\_6

|   |              |              |              |
|---|--------------|--------------|--------------|
| C | 2.121940151  | 2.139810155  | 0.884493064  |
| N | 0.788427057  | 1.985167142  | 0.561588038  |
| C | 0.549826042  | 0.782081058  | -0.107945010 |
| C | 2.701033193  | 0.852432061  | -0.920971067 |
| N | 3.086469221  | 1.579981113  | 0.201894017  |
| N | 1.477908108  | 0.195549012  | -0.816919061 |
| H | 3.477703249  | 0.354393025  | -1.476331107 |
| N | -0.663131045 | 0.242142016  | 0.033841001  |
| H | -0.846191061 | -0.616630044 | -0.455227030 |
| H | -1.420829102 | 0.838425062  | 0.317592023  |
| H | 2.380993169  | 2.789006201  | 1.705710124  |
| O | -1.126477083 | 3.898863282  | 1.902974136  |
| H | -0.439899030 | 3.422072247  | 1.446961103  |
| H | -0.935274067 | 4.823127345  | 1.814357129  |
| O | -3.003487217 | 2.121021150  | 0.652784048  |
| H | -3.842068275 | 1.926376137  | 1.049954074  |
| H | -2.620925187 | 2.848648207  | 1.137190081  |
| O | -1.031588072 | -2.536309184 | -1.248723092 |
| H | -0.130558008 | -2.776938203 | -1.448614104 |
| H | -1.413608103 | -3.266048235 | -0.778698054 |
| O | 4.693058339  | 3.686075263  | 2.886180210  |
| H | 4.977066356  | 3.703147267  | 3.789858272  |
| H | 5.276567381  | 3.089346220  | 2.427469177  |
| O | 5.897046422  | 1.635789119  | 1.196033088  |
| H | 5.034751365  | 1.539997109  | 0.805579057  |
| H | 6.525093471  | 1.659430118  | 0.485878035  |
| O | 1.872923134  | -2.558455183 | -1.720751125 |
| H | 2.205999158  | -2.565420182 | -2.607972187 |
| H | 1.779507130  | -1.645966118 | -1.464356106 |

## Coord\_7

|   |              |              |              |
|---|--------------|--------------|--------------|
| C | 2.143256152  | 2.123090154  | 0.898136063  |
| N | 0.801806060  | 1.984217142  | 0.553924038  |
| C | 0.555658041  | 0.765044053  | -0.098167005 |
| C | 2.697729195  | 0.848069059  | -0.913996066 |
| N | 3.098690226  | 1.583797116  | 0.195994013  |
| N | 1.469716105  | 0.197656016  | -0.828293059 |
| H | 3.468777251  | 0.362090025  | -1.486928109 |
| N | -0.650594048 | 0.216788017  | 0.092018007  |
| H | -0.841786063 | -0.640391045 | -0.396598028 |
| H | -1.409186102 | 0.824470060  | 0.346806026  |
| H | 2.395835173  | 2.749937198  | 1.738057126  |
| O | -1.134889081 | 3.923367284  | 1.887991138  |
| H | -0.442862031 | 3.461950251  | 1.425872103  |
| H | -0.947830067 | 4.850583347  | 1.824180130  |
| O | -3.001284215 | 2.129997155  | 0.633002048  |
| H | -3.846455277 | 1.937648142  | 1.017197071  |
| H | -2.628310189 | 2.861860208  | 1.117865078  |
| O | -1.035068074 | -2.559521184 | -1.239810091 |
| H | -0.133388010 | -2.786014201 | -1.452586103 |
| H | -1.403799099 | -3.302151237 | -0.779514056 |
| O | 4.683434336  | 3.683163264  | 2.890869207  |
| H | 4.972577356  | 3.704811265  | 3.792823273  |
| H | 5.270379378  | 3.091362221  | 2.429943176  |
| O | 5.899041426  | 1.645103120  | 1.198282086  |
| H | 5.042320362  | 1.555896113  | 0.793690058  |
| H | 6.539385469  | 1.661984118  | 0.499109038  |
| O | 1.865598135  | -2.545070184 | -1.749148125 |
| H | 2.182275158  | -2.549682181 | -2.642328189 |
| H | 1.761247128  | -1.632942119 | -1.494564110 |

## Coord\_8

|   |              |              |              |
|---|--------------|--------------|--------------|
| C | 2.166155154  | 2.106289152  | 0.912464066  |
| N | 0.817045058  | 1.984878142  | 0.546864041  |
| C | 0.562383042  | 0.749813052  | -0.086654008 |
| C | 2.693901196  | 0.845474063  | -0.906986066 |
| N | 3.111202225  | 1.588230113  | 0.190174016  |
| N | 1.461072106  | 0.201548014  | -0.838103058 |
| H | 3.458528247  | 0.372101026  | -1.498139110 |
| N | -0.635993047 | 0.195676015  | 0.153225013  |
| H | -0.837908062 | -0.659424047 | -0.334586027 |
| H | -1.396359100 | 0.812516058  | 0.377943027  |
| H | 2.411905174  | 2.709606197  | 1.771030128  |
| O | -1.149164082 | 3.952047284  | 1.870000133  |
| H | -0.450786032 | 3.507060251  | 1.402763102  |
| H | -0.968318069 | 4.881874349  | 1.829657131  |

|   |              |              |              |
|---|--------------|--------------|--------------|
| O | -2.999973215 | 2.136849154  | 0.612292045  |
| H | -3.851156276 | 1.945029138  | 0.983350068  |
| H | -2.638577191 | 2.874420208  | 1.096633079  |
| O | -1.036233074 | -2.587372185 | -1.228436088 |
| H | -0.134091012 | -2.797248200 | -1.455553105 |
| H | -1.389496099 | -3.344158242 | -0.779258056 |
| O | 4.676492335  | 3.675579265  | 2.896210209  |
| H | 4.970295359  | 3.700093269  | 3.796589275  |
| H | 5.266289377  | 3.088688220  | 2.432435177  |
| O | 5.901785427  | 1.650883117  | 1.198603085  |
| H | 5.050783361  | 1.570319114  | 0.779581055  |
| H | 6.554407472  | 1.661852120  | 0.511016039  |
| O | 1.858867133  | -2.528738182 | -1.778337129 |
| H | 2.157585155  | -2.528859183 | -2.677601192 |
| H | 1.741635126  | -1.617914115 | -1.523350109 |

Coord\_9

|   |              |              |              |
|---|--------------|--------------|--------------|
| C | 2.190828160  | 2.089319152  | 0.927534066  |
| N | 0.834372062  | 1.987051145  | 0.540604038  |
| C | 0.570069040  | 0.736305051  | -0.073049003 |
| C | 2.689451196  | 0.844735062  | -0.899913067 |
| N | 3.124039224  | 1.593378113  | 0.184392014  |
| N | 1.451855103  | 0.207155017  | -0.846123062 |
| H | 3.446763250  | 0.384645030  | -1.510037110 |
| N | -0.619243042 | 0.179136013  | 0.218066017  |
| H | -0.834924058 | -0.673258048 | -0.268452021 |
| H | -1.382156099 | 0.802900060  | 0.411774032  |
| H | 2.429349174  | 2.667870194  | 1.804637128  |
| O | -1.168458085 | 3.985396288  | 1.848296135  |
| H | -0.463186031 | 3.557668255  | 1.376711098  |
| H | -0.995846070 | 4.917536355  | 1.829597133  |
| O | -2.999249216 | 2.141824156  | 0.591589043  |
| H | -3.855707279 | 1.948874140  | 0.949803067  |
| H | -2.651190189 | 2.886649209  | 1.073948076  |
| O | -1.034623073 | -2.620965188 | -1.214865088 |
| H | -0.132371011 | -2.811251204 | -1.458009106 |
| H | -1.369883097 | -3.393379246 | -0.778745056 |
| O | 4.670805335  | 3.663045263  | 2.901611209  |
| H | 4.967916358  | 3.688419264  | 3.800884273  |
| H | 5.263194379  | 3.080989220  | 2.434839177  |
| O | 5.905046423  | 1.652881121  | 1.197258086  |
| H | 5.060332364  | 1.583459114  | 0.762703053  |
| H | 6.570596475  | 1.658925119  | 0.522578038  |
| O | 1.852578131  | -2.509178182 | -1.808889130 |
| H | 2.131561155  | -2.502107178 | -2.714300195 |
| H | 1.720355125  | -1.600906115 | -1.550616109 |

## Coord\_10

|   |              |              |              |
|---|--------------|--------------|--------------|
| C | 2.407829171  | 2.029857145  | 0.980960071  |
| N | 1.038863074  | 1.949059140  | 0.591667044  |
| C | 0.752902055  | 0.679947049  | 0.010798999  |
| C | 2.847250206  | 0.791590055  | -0.853764064 |
| N | 3.316175238  | 1.550415112  | 0.206815016  |
| N | 1.604170117  | 0.163116014  | -0.792671059 |
| H | 3.586759261  | 0.340098027  | -1.490943109 |
| N | -0.422672030 | 0.127998007  | 0.374079027  |
| H | -0.664090047 | -0.723259054 | -0.102092008 |
| H | -1.185118088 | 0.759254055  | 0.542419037  |
| H | 2.651867191  | 2.587215189  | 1.869896134  |
| O | -0.984758071 | 3.994929289  | 1.893237137  |
| H | -0.279822018 | 3.580436259  | 1.410837103  |
| H | -0.820116059 | 4.928731354  | 1.885988133  |
| O | -2.812620201 | 2.113047153  | 0.678807048  |
| H | -3.669201266 | 1.921617140  | 1.037650073  |
| H | -2.471278179 | 2.868816206  | 1.148115083  |
| O | -0.877262063 | -2.707545195 | -1.085605078 |
| H | 0.021603000  | -2.880417205 | -1.352890099 |
| H | -1.188104087 | -3.489250251 | -0.648025046 |
| O | 4.883151354  | 3.608940260  | 2.901336211  |
| H | 5.192565372  | 3.637391263  | 3.796362273  |
| H | 5.470909392  | 3.027340220  | 2.427970175  |
| O | 6.100546439  | 1.601362117  | 1.185884088  |
| H | 5.257464378  | 1.545553111  | 0.744722054  |
| H | 6.772052487  | 1.598207115  | 0.517874039  |
| O | 1.992320142  | -2.547043185 | -1.759953126 |
| H | 2.236736159  | -2.546465185 | -2.674907193 |
| H | 1.845557134  | -1.638177116 | -1.509195109 |

LIIC path connecting T1-MIN and T<sub>1</sub>/S<sub>0</sub>

## Coord\_1

|   |              |              |              |
|---|--------------|--------------|--------------|
| C | 2.407829171  | 2.029857145  | 0.980960071  |
| N | 1.038863074  | 1.949059140  | 0.591667044  |
| C | 0.752902055  | 0.679947049  | 0.010798999  |
| C | 2.847250206  | 0.791590055  | -0.853764064 |
| N | 3.316175238  | 1.550415112  | 0.206815016  |
| N | 1.604170117  | 0.163116014  | -0.792671059 |
| H | 3.586759261  | 0.340098027  | -1.490943109 |
| N | -0.422672030 | 0.127998007  | 0.374079027  |
| H | -0.664090047 | -0.723259054 | -0.102092008 |
| H | -1.185118088 | 0.759254055  | 0.542419037  |
| H | 2.651867191  | 2.587215189  | 1.869896134  |
| O | -0.984758071 | 3.994929289  | 1.893237137  |
| H | -0.279822018 | 3.580436259  | 1.410837103  |
| H | -0.820116059 | 4.928731354  | 1.885988133  |

|   |              |              |              |
|---|--------------|--------------|--------------|
| O | -2.812620201 | 2.113047153  | 0.678807048  |
| H | -3.669201266 | 1.921617140  | 1.037650073  |
| H | -2.471278179 | 2.868816206  | 1.148115083  |
| O | -0.877262063 | -2.707545195 | -1.085605078 |
| H | 0.021603000  | -2.880417205 | -1.352890099 |
| H | -1.188104087 | -3.489250251 | -0.648025046 |
| O | 4.883151354  | 3.608940260  | 2.901336211  |
| H | 5.192565372  | 3.637391263  | 3.796362273  |
| H | 5.470909392  | 3.027340220  | 2.427970175  |
| O | 6.100546439  | 1.601362117  | 1.185884088  |
| H | 5.257464378  | 1.545553111  | 0.744722054  |
| H | 6.772052487  | 1.598207115  | 0.517874039  |
| O | 1.992320142  | -2.547043185 | -1.759953126 |
| H | 2.236736159  | -2.546465185 | -2.674907193 |
| H | 1.845557134  | -1.638177116 | -1.509195109 |

Coord\_2

|   |              |              |              |
|---|--------------|--------------|--------------|
| C | 2.379854173  | 2.058386149  | 0.971326071  |
| N | 1.025384072  | 1.954285141  | 0.594569042  |
| C | 0.752378053  | 0.693929050  | -0.007150000 |
| C | 2.848972207  | 0.816681058  | -0.875954064 |
| N | 3.304470239  | 1.540784112  | 0.227994017  |
| N | 1.619464117  | 0.162879011  | -0.790026056 |
| H | 3.599272260  | 0.367019025  | -1.503076106 |
| N | -0.428953031 | 0.143218012  | 0.320587024  |
| H | -0.666010050 | -0.711963051 | -0.151315012 |
| H | -1.190829085 | 0.766265056  | 0.521184037  |
| H | 2.631718191  | 2.647234192  | 1.837617131  |
| O | -0.978907070 | 3.968421287  | 1.916854138  |
| H | -0.279322020 | 3.543640253  | 1.434764101  |
| H | -0.813986059 | 4.901771355  | 1.890319137  |
| O | -2.812485203 | 2.099681152  | 0.701548049  |
| H | -3.664469263 | 1.905532136  | 1.069760078  |
| H | -2.465102178 | 2.852354205  | 1.171956084  |
| O | -0.878009061 | -2.678095195 | -1.095496079 |
| H | 0.021948002  | -2.864625206 | -1.350383095 |
| H | -1.200296087 | -3.447785250 | -0.644966047 |
| O | 4.888989354  | 3.625321259  | 2.867143206  |
| H | 5.171861370  | 3.653206265  | 3.770931269  |
| H | 5.474923392  | 3.024387215  | 2.416269172  |
| O | 6.101513441  | 1.571308114  | 1.202266087  |
| H | 5.260606379  | 1.497625109  | 0.760417054  |
| H | 6.773703488  | 1.558424114  | 0.534623039  |
| O | 1.995372145  | -2.559549183 | -1.730222122 |
| H | 2.265997164  | -2.572196186 | -2.637682188 |
| H | 1.865637135  | -1.645364121 | -1.488480106 |

## Coord\_3

|   |              |              |              |
|---|--------------|--------------|--------------|
| C | 2.350497171  | 2.086352150  | 0.962936072  |
| N | 1.010893072  | 1.961536139  | 0.598182042  |
| C | 0.751584054  | 0.709785052  | -0.023582001 |
| C | 2.849045207  | 0.845166061  | -0.895698064 |
| N | 3.289568238  | 1.530720108  | 0.251393018  |
| N | 1.634958120  | 0.165141011  | -0.784881056 |
| H | 3.610171258  | 0.397825031  | -1.512692108 |
| N | -0.434727032 | 0.160878012  | 0.268358018  |
| H | -0.666517049 | -0.698234050 | -0.199600012 |
| H | -1.196250088 | 0.774155057  | 0.499839038  |
| H | 2.609201186  | 2.704974192  | 1.806452131  |
| O | -0.977686073 | 3.943468283  | 1.938099138  |
| H | -0.282616021 | 3.508895253  | 1.457356107  |
| H | -0.813499057 | 4.876117350  | 1.891726135  |
| O | -2.813155205 | 2.084693148  | 0.721173053  |
| H | -3.660547265 | 1.886783138  | 1.097878080  |
| H | -2.461254176 | 2.834989206  | 1.192584086  |
| O | -0.875560065 | -2.650095189 | -1.104046080 |
| H | 0.025390004  | -2.848751207 | -1.346792099 |
| H | -1.208396087 | -3.408364244 | -0.641872048 |
| O | 4.901920350  | 3.636756261  | 2.835010204  |
| H | 5.163011373  | 3.665454263  | 3.745309269  |
| H | 5.483330394  | 3.017452215  | 2.403632171  |
| O | 6.100876439  | 1.538226112  | 1.214698085  |
| H | 5.259741381  | 1.445439104  | 0.777883058  |
| H | 6.769650488  | 1.515121111  | 0.543395040  |
| O | 2.000355143  | -2.568536184 | -1.698959124 |
| H | 2.297003167  | -2.593132189 | -2.597993185 |
| H | 1.886708137  | -1.650043117 | -1.464413104 |

## Coord\_4

|   |              |              |              |
|---|--------------|--------------|--------------|
| C | 2.320121169  | 2.114179153  | 0.955374071  |
| N | 0.995561071  | 1.971088143  | 0.602382042  |
| C | 0.750714055  | 0.727720055  | -0.038522003 |
| C | 2.847455204  | 0.877337064  | -0.913216064 |
| N | 3.271554235  | 1.520368110  | 0.276423017  |
| N | 1.650853118  | 0.170143011  | -0.777205055 |
| H | 3.619392262  | 0.432828032  | -1.520076110 |
| N | -0.439727032 | 0.181084015  | 0.217428015  |
| H | -0.665316050 | -0.682029050 | -0.246779016 |
| H | -1.201204087 | 0.783060057  | 0.478421033  |
| H | 2.585035185  | 2.761109199  | 1.775872127  |
| O | -0.981074072 | 3.920372284  | 1.956968138  |
| H | -0.289634023 | 3.476510251  | 1.478630107  |
| H | -0.818625060 | 4.852032350  | 1.890192135  |
| O | -2.814559202 | 2.068250150  | 0.737712054  |

|   |              |              |              |
|---|--------------|--------------|--------------|
| H | -3.657369265 | 1.865543132  | 1.122061083  |
| H | -2.459693177 | 2.816937203  | 1.210025085  |
| O | -0.869550062 | -2.623508191 | -1.110442081 |
| H | 0.032347002  | -2.832756205 | -1.341385098 |
| H | -1.211942088 | -3.370973241 | -0.637694045 |
| O | 4.920138357  | 3.641561264  | 2.805129200  |
| H | 5.164304370  | 3.671879263  | 3.720064270  |
| H | 5.494927393  | 3.005286218  | 2.389957172  |
| O | 6.098441441  | 1.501746109  | 1.222338087  |
| H | 5.254796378  | 1.388976098  | 0.796209058  |
| H | 6.759742485  | 1.469210106  | 0.543553037  |
| O | 2.007739145  | -2.573916186 | -1.665766121 |
| H | 2.330158169  | -2.609272185 | -2.555509184 |
| H | 1.909106136  | -1.651993119 | -1.436769101 |

Coord\_5

|   |              |              |              |
|---|--------------|--------------|--------------|
| C | 2.289083167  | 2.142198152  | 0.948305067  |
| N | 0.979572071  | 1.983182145  | 0.607094043  |
| C | 0.749954056  | 0.747922052  | -0.051968005 |
| C | 2.844179205  | 0.913421068  | -0.928625066 |
| N | 3.250507236  | 1.509783110  | 0.302605020  |
| N | 1.667360119  | 0.178104012  | -0.766904053 |
| H | 3.626881263  | 0.472268035  | -1.525392108 |
| N | -0.443715033 | 0.203935016  | 0.167798010  |
| H | -0.662122047 | -0.663301049 | -0.292741023 |
| H | -1.205523088 | 0.793114059  | 0.456912031  |
| H | 2.559925185  | 2.816172203  | 1.745392126  |
| O | -0.989078073 | 3.899388279  | 1.973451142  |
| H | -0.300320022 | 3.446752248  | 1.498621105  |
| H | -0.829334062 | 4.829722349  | 1.885716136  |
| O | -2.816609203 | 2.050531148  | 0.751093052  |
| H | -3.654859261 | 1.842007133  | 1.142225081  |
| H | -2.460370180 | 2.798413200  | 1.224223091  |
| O | -0.859637064 | -2.598318185 | -1.113928079 |
| H | 0.043214001  | -2.816600201 | -1.333477094 |
| H | -1.210508086 | -3.335631239 | -0.631496046 |
| O | 4.941989355  | 3.638169265  | 2.777887203  |
| H | 5.174479374  | 3.670417263  | 3.695798265  |
| H | 5.508603397  | 2.986799215  | 2.375154169  |
| O | 6.093939439  | 1.461641104  | 1.224228086  |
| H | 5.245637378  | 1.328072094  | 0.814657061  |
| H | 6.743421484  | 1.421733101  | 0.534089040  |
| O | 2.017982143  | -2.575585185 | -1.630225117 |
| H | 2.365878168  | -2.620538189 | -2.509862180 |
| H | 1.933163137  | -1.650999118 | -1.405254104 |

Coord\_6



|   |              |              |              |
|---|--------------|--------------|--------------|
| C | 2.257724160  | 2.170684155  | 0.941449068  |
| N | 0.963111071  | 1.998059143  | 0.612281043  |
| C | 0.749486052  | 0.770583057  | -0.063894004 |
| C | 2.839175204  | 0.953599067  | -0.941952066 |
| N | 3.226491230  | 1.498967108  | 0.329537025  |
| N | 1.684699120  | 0.189250014  | -0.753818055 |
| H | 3.632579264  | 0.516342039  | -1.528692111 |
| N | -0.446468030 | 0.229531018  | 0.119431008  |
| H | -0.656644047 | -0.641992044 | -0.337430026 |
| H | -1.209056087 | 0.804447057  | 0.435227030  |
| H | 2.534562185  | 2.870605206  | 1.714548125  |
| O | -1.001793070 | 3.880736278  | 1.987489145  |
| H | -0.314688020 | 3.419858249  | 1.517350112  |
| H | -0.845672060 | 4.809354348  | 1.878264135  |
| O | -2.819226201 | 2.031710144  | 0.761111055  |
| H | -3.652968262 | 1.816355133  | 1.158111082  |
| H | -2.463276178 | 2.779611199  | 1.235007088  |
| O | -0.845481059 | -2.574545188 | -1.113748079 |
| H | 0.058392005  | -2.800256202 | -1.322373093 |
| H | -1.203671084 | -3.302405236 | -0.622384043 |
| O | 4.966090357  | 3.625046261  | 2.753996199  |
| H | 5.192915375  | 3.659034263  | 3.673265263  |
| H | 5.523420397  | 2.960990214  | 2.359185171  |
| O | 6.086979440  | 1.417827101  | 1.219200087  |
| H | 5.232041375  | 1.262482092  | 0.832627058  |
| H | 6.719613482  | 1.373931097  | 0.513543035  |
| O | 2.031545146  | -2.573416183 | -1.591853114 |
| H | 2.404602174  | -2.626772188 | -2.460619179 |
| H | 1.959213141  | -1.646841118 | -1.369482097 |

Coord\_7

|   |              |              |              |
|---|--------------|--------------|--------------|
| C | 2.226354162  | 2.199891156  | 0.934559069  |
| N | 0.946340068  | 2.015988145  | 0.617923047  |
| C | 0.749476056  | 0.795921059  | -0.074250003 |
| C | 2.832369202  | 0.998036071  | -0.953140069 |
| N | 3.199530232  | 1.487910108  | 0.356874025  |
| N | 1.703086124  | 0.203830017  | -0.737709053 |
| H | 3.636408263  | 0.565223041  | -1.529925109 |
| N | -0.447766033 | 0.257981021  | 0.072241003  |
| H | -0.648556049 | -0.618028046 | -0.380844029 |
| H | -1.211681087 | 0.817192058  | 0.413193032  |
| H | 2.509626183  | 2.924790209  | 1.682869119  |
| O | -1.019478073 | 3.864611279  | 1.998930143  |
| H | -0.332890024 | 3.396055242  | 1.534788111  |
| H | -0.867838062 | 4.791067342  | 1.867716135  |
| O | -2.822382204 | 2.011927143  | 0.767382054  |
| H | -3.651711265 | 1.788729128  | 1.169237082  |

|   |              |              |              |
|---|--------------|--------------|--------------|
| H | -2.468490177 | 2.760691196  | 1.242041092  |
| O | -0.826715058 | -2.552287183 | -1.109077079 |
| H | 0.078315005  | -2.783734198 | -1.307309094 |
| H | -1.190951087 | -3.271467238 | -0.609426042 |
| O | 4.991531358  | 3.600594261  | 2.734630196  |
| H | 5.219930376  | 3.635555261  | 3.653478262  |
| H | 5.538734400  | 2.926878211  | 2.342113167  |
| O | 6.076980435  | 1.370368099  | 1.205772087  |
| H | 5.213674374  | 1.191941088  | 0.849635063  |
| H | 6.686497480  | 1.327330097  | 0.479934036  |
| O | 2.048911146  | -2.567234186 | -1.550073110 |
| H | 2.446801175  | -2.627717188 | -2.407247171 |
| H | 1.987588144  | -1.639269116 | -1.328939098 |

Coord\_8

|   |              |              |              |
|---|--------------|--------------|--------------|
| C | 2.195213161  | 2.230110162  | 0.927406069  |
| N | 0.929356066  | 2.037313147  | 0.624003044  |
| C | 0.750047054  | 0.824221061  | -0.082968008 |
| C | 2.823618203  | 1.046923073  | -0.962053071 |
| N | 3.169563226  | 1.476650105  | 0.384319025  |
| N | 1.722706122  | 0.222162018  | -0.718253053 |
| H | 3.638239264  | 0.619106043  | -1.528936109 |
| N | -0.447408034 | 0.289425019  | 0.026069002  |
| H | -0.637483046 | -0.591310040 | -0.423057033 |
| H | -1.213328088 | 0.831477060  | 0.390505028  |
| H | 2.485750177  | 2.979106216  | 1.649860117  |
| O | -1.042685073 | 3.851187275  | 2.007470143  |
| H | -0.355329023 | 3.375582242  | 1.550809111  |
| H | -0.896324065 | 4.774982344  | 1.853807135  |
| O | -2.826159201 | 1.991261142  | 0.769267057  |
| H | -3.651228264 | 1.759178124  | 1.174805085  |
| H | -2.476272178 | 2.741756197  | 1.244751088  |
| O | -0.802896060 | -2.531828180 | -1.098957078 |
| H | 0.103508007  | -2.767133199 | -1.287397091 |
| H | -1.171735084 | -3.243215232 | -0.591584043 |
| O | 5.018317363  | 3.563054258  | 2.721627194  |
| H | 5.257354378  | 3.597481260  | 3.637790262  |
| H | 5.554452399  | 2.883413205  | 2.324166168  |
| O | 6.063016437  | 1.319498094  | 1.182045087  |
| H | 5.190046371  | 1.116246082  | 0.865315061  |
| H | 6.641112477  | 1.283802093  | 0.430751032  |
| O | 2.070626151  | -2.556771182 | -1.504166110 |
| H | 2.493012182  | -2.622938188 | -2.349079172 |
| H | 2.018605143  | -1.627964117 | -1.282939090 |

Coord\_9

|   |             |             |             |
|---|-------------|-------------|-------------|
| C | 2.164366154 | 2.261763163 | 0.919771068 |
|---|-------------|-------------|-------------|

|   |              |              |              |
|---|--------------|--------------|--------------|
| N | 0.912083064  | 2.062549149  | 0.630496044  |
| C | 0.751202052  | 0.855925060  | -0.089962006 |
| C | 2.812619201  | 1.100571079  | -0.968472070 |
| N | 3.136348225  | 1.465376106  | 0.411625032  |
| N | 1.743640126  | 0.244737016  | -0.695016049 |
| H | 3.637800264  | 0.678304049  | -1.525446111 |
| N | -0.445259030 | 0.324087023  | -0.019360003 |
| H | -0.623013044 | -0.561655042 | -0.464262033 |
| H | -1.214072090 | 0.847464061  | 0.366658026  |
| H | 2.463422178  | 3.034008218  | 1.615000116  |
| O | -1.072498078 | 3.840644275  | 2.012568146  |
| H | -0.382871027 | 3.358732244  | 1.565136114  |
| H | -0.932161065 | 4.761227344  | 1.836047131  |
| O | -2.830879203 | 1.969711139  | 0.765739054  |
| H | -3.651925264 | 1.727620126  | 1.173545082  |
| H | -2.487225179 | 2.722841196  | 1.242199088  |
| O | -0.773408054 | -2.513958182 | -1.082208078 |
| H | 0.134720008  | -2.750831201 | -1.261548089 |
| H | -1.145057084 | -3.218665233 | -0.567630041 |
| O | 5.048277363  | 3.510364254  | 2.717710198  |
| H | 5.309581384  | 3.541720255  | 3.627889261  |
| H | 5.571546401  | 2.829344202  | 2.305810168  |
| O | 6.043544434  | 1.265596089  | 1.145612085  |
| H | 5.160397369  | 1.035387073  | 0.879440062  |
| H | 6.578711472  | 1.245523089  | 0.363117026  |
| O | 2.097394153  | -2.541556183 | -1.453217105 |
| H | 2.543899184  | -2.611629188 | -2.285285166 |
| H | 2.052512149  | -1.612425118 | -1.230580086 |

Coord\_10

|   |              |              |              |
|---|--------------|--------------|--------------|
| C | 1.960190140  | 2.363459172  | 0.892644066  |
| N | 0.726979053  | 2.146382155  | 0.601789041  |
| C | 0.609903043  | 0.947599070  | -0.138174011 |
| C | 2.663444193  | 1.245138091  | -0.987650073 |
| N | 2.942320211  | 1.536921113  | 0.428147030  |
| N | 1.637797119  | 0.343685023  | -0.700442052 |
| H | 3.511239254  | 0.842117058  | -1.525882111 |
| N | -0.577700040 | 0.403224031  | -0.125317010 |
| H | -0.724321054 | -0.487630035 | -0.571954043 |
| H | -1.361940099 | 0.894596063  | 0.272525019  |
| H | 2.251025162  | 3.158563229  | 1.566614111  |
| O | -1.316945094 | 3.855160279  | 1.960353142  |
| H | -0.611701044 | 3.378714241  | 1.530852112  |
| H | -1.192297086 | 4.774508344  | 1.766735125  |
| O | -3.003507214 | 1.954026140  | 0.671291048  |
| H | -3.822762275 | 1.688469122  | 1.067894077  |
| H | -2.684354192 | 2.712490198  | 1.156845084  |

|   |              |              |              |
|---|--------------|--------------|--------------|
| O | -0.824876061 | -2.459091179 | -1.135401081 |
| H | 0.090604009  | -2.681868192 | -1.295942091 |
| H | -1.194415086 | -3.165901229 | -0.622222045 |
| O | 4.875634349  | 3.535517255  | 2.750792200  |
| H | 5.162452371  | 3.558971259  | 3.653501265  |
| H | 5.395831386  | 2.867035207  | 2.315225168  |
| O | 5.853267419  | 1.324488098  | 1.119094082  |
| H | 4.966794359  | 1.055052077  | 0.904882068  |
| H | 6.339486456  | 1.340098096  | 0.306075020  |
| O | 2.046741148  | -2.441023174 | -1.437621103 |
| H | 2.528015183  | -2.502535182 | -2.250758161 |
| H | 1.991091144  | -1.513821108 | -1.208409089 |

LIIC path connecting T<sub>1</sub>/S<sub>0</sub> and S<sub>0</sub>-MIN

Coord\_1

|   |              |              |              |
|---|--------------|--------------|--------------|
| C | 1.960190140  | 2.363459172  | 0.892644066  |
| N | 0.726979053  | 2.146382155  | 0.601789041  |
| C | 0.609903043  | 0.947599070  | -0.138174011 |
| C | 2.663444193  | 1.245138091  | -0.987650073 |
| N | 2.942320211  | 1.536921113  | 0.428147030  |
| N | 1.637797119  | 0.343685023  | -0.700442052 |
| H | 3.511239254  | 0.842117058  | -1.525882111 |
| N | -0.577700040 | 0.403224031  | -0.125317010 |
| H | -0.724321054 | -0.487630035 | -0.571954043 |
| H | -1.361940099 | 0.894596063  | 0.272525019  |
| H | 2.251025162  | 3.158563229  | 1.566614111  |
| O | -1.316945094 | 3.855160279  | 1.960353142  |
| H | -0.611701044 | 3.378714241  | 1.530852112  |
| H | -1.192297086 | 4.774508344  | 1.766735125  |
| O | -3.003507214 | 1.954026140  | 0.671291048  |
| H | -3.822762275 | 1.688469122  | 1.067894077  |
| H | -2.684354192 | 2.712490198  | 1.156845084  |
| O | -0.824876061 | -2.459091179 | -1.135401081 |
| H | 0.090604009  | -2.681868192 | -1.295942091 |
| H | -1.194415086 | -3.165901229 | -0.622222045 |
| O | 4.875634349  | 3.535517255  | 2.750792200  |
| H | 5.162452371  | 3.558971259  | 3.653501265  |
| H | 5.395831386  | 2.867035207  | 2.315225168  |
| O | 5.853267419  | 1.324488098  | 1.119094082  |
| H | 4.966794359  | 1.055052077  | 0.904882068  |
| H | 6.339486456  | 1.340098096  | 0.306075020  |
| O | 2.046741148  | -2.441023174 | -1.437621103 |
| H | 2.528015183  | -2.502535182 | -2.250758161 |
| H | 1.991091144  | -1.513821108 | -1.208409089 |

Coord\_2

|   |             |             |             |
|---|-------------|-------------|-------------|
| C | 1.978383143 | 2.341693170 | 0.875405064 |
|---|-------------|-------------|-------------|

|   |              |              |              |
|---|--------------|--------------|--------------|
| N | 0.743468052  | 2.105040151  | 0.592155041  |
| C | 0.608816044  | 0.920363069  | -0.151480009 |
| C | 2.706015195  | 1.131879083  | -0.955241067 |
| N | 2.980773215  | 1.549269110  | 0.415263030  |
| N | 1.623791115  | 0.294893023  | -0.718260054 |
| H | 3.550982254  | 0.705517053  | -1.479229109 |
| N | -0.594892041 | 0.403514030  | -0.164062013 |
| H | -0.746990055 | -0.488625036 | -0.604927046 |
| H | -1.366932098 | 0.898992066  | 0.250780019  |
| H | 2.253891160  | 3.146410229  | 1.543861109  |
| O | -1.236036089 | 3.838726278  | 1.985843145  |
| H | -0.547650038 | 3.348571242  | 1.544768113  |
| H | -1.095626082 | 4.755589342  | 1.791212128  |
| O | -2.987375214 | 1.979476142  | 0.715646050  |
| H | -3.799667271 | 1.720738123  | 1.130543080  |
| H | -2.643594188 | 2.726009195  | 1.202553086  |
| O | -0.865460061 | -2.453493177 | -1.141119084 |
| H | 0.041120004  | -2.698183192 | -1.317121093 |
| H | -1.245518088 | -3.154814225 | -0.627898043 |
| O | 4.790070346  | 3.612950259  | 2.741939197  |
| H | 5.010451360  | 3.631353260  | 3.663199264  |
| H | 5.338288382  | 2.944484213  | 2.342278170  |
| O | 5.877038421  | 1.404955103  | 1.175080082  |
| H | 5.011260361  | 1.163358081  | 0.881449062  |
| H | 6.425537461  | 1.418516100  | 0.396617030  |
| O | 2.012137147  | -2.480247178 | -1.506825110 |
| H | 2.460146179  | -2.538387184 | -2.339539170 |
| H | 1.955580138  | -1.554193109 | -1.277401091 |

Coord\_3

|   |              |              |              |
|---|--------------|--------------|--------------|
| C | 1.992258144  | 2.325895165  | 0.858727064  |
| N | 0.755418055  | 2.071772148  | 0.583132040  |
| C | 0.605362046  | 0.899861065  | -0.162087013 |
| C | 2.740051199  | 1.027973072  | -0.912249067 |
| N | 3.010305216  | 1.562469113  | 0.402452030  |
| N | 1.610370116  | 0.254618020  | -0.729425053 |
| H | 3.582590260  | 0.578701043  | -1.420222104 |
| N | -0.612261046 | 0.408615029  | -0.202026015 |
| H | -0.767702058 | -0.485944034 | -0.635402046 |
| H | -1.374806097 | 0.906026064  | 0.226504018  |
| H | 2.253687162  | 3.140351229  | 1.520519111  |
| O | -1.174656084 | 3.826586274  | 2.002444144  |
| H | -0.500077035 | 3.325183237  | 1.552949114  |
| H | -1.021998074 | 4.740947341  | 1.805258128  |
| O | -2.978056212 | 2.000415146  | 0.750578057  |
| H | -3.783104272 | 1.745449123  | 1.181511083  |
| H | -2.614440189 | 2.736933196  | 1.238006089  |

|   |              |              |              |
|---|--------------|--------------|--------------|
| O | -0.894245065 | -2.453067179 | -1.143490084 |
| H | 0.004714001  | -2.714813196 | -1.331472094 |
| H | -1.283001094 | -3.150263227 | -0.630978045 |
| O | 4.738664343  | 3.671165265  | 2.746845199  |
| H | 4.912237354  | 3.677316263  | 3.678180266  |
| H | 5.302276383  | 3.003787218  | 2.367380169  |
| O | 5.890697422  | 1.473845106  | 1.210132085  |
| H | 5.041028365  | 1.265668089  | 0.858917060  |
| H | 6.482551467  | 1.492303105  | 0.460715032  |
| O | 1.988830144  | -2.509899180 | -1.563939115 |
| H | 2.405681171  | -2.562129187 | -2.413538173 |
| H | 1.925634141  | -1.585411112 | -1.333931096 |

Coord\_4

|   |              |              |              |
|---|--------------|--------------|--------------|
| C | 2.004165145  | 2.314111166  | 0.843049061  |
| N | 0.764882056  | 2.045293145  | 0.575334041  |
| C | 0.600569044  | 0.885184064  | -0.170046013 |
| C | 2.766412200  | 0.932230070  | -0.859735062 |
| N | 3.033539219  | 1.574356112  | 0.389750030  |
| N | 1.597932117  | 0.221336015  | -0.734739051 |
| H | 3.606313260  | 0.460260035  | -1.350654098 |
| N | -0.629073044 | 0.418186031  | -0.239075015 |
| H | -0.786575058 | -0.479628034 | -0.663504046 |
| H | -1.384423099 | 0.915870068  | 0.200458015  |
| H | 2.253277161  | 3.138088223  | 1.497302110  |
| O | -1.128951082 | 3.818910273  | 2.012936147  |
| H | -0.465468034 | 3.308247237  | 1.557575113  |
| H | -0.966941070 | 4.730883342  | 1.812168130  |
| O | -2.974093215 | 2.018376147  | 0.778112054  |
| H | -3.771814270 | 1.764668127  | 1.223080089  |
| H | -2.594588189 | 2.746539197  | 1.265658092  |
| O | -0.913532068 | -2.457190179 | -1.143791080 |
| H | -0.020830004 | -2.731968196 | -1.340772099 |
| H | -1.309620096 | -3.151609226 | -0.632948045 |
| O | 4.708078337  | 3.712998267  | 2.760331197  |
| H | 4.851041350  | 3.703795266  | 3.696791266  |
| H | 5.280303383  | 3.048366221  | 2.389126173  |
| O | 5.899079426  | 1.532505108  | 1.227674088  |
| H | 5.059766362  | 1.359574100  | 0.836685059  |
| H | 6.519932469  | 1.561941111  | 0.501447038  |
| O | 1.975251144  | -2.531684180 | -1.611261118 |
| H | 2.362744169  | -2.575966187 | -2.475503178 |
| H | 1.900634135  | -1.609315117 | -1.379959098 |

Coord\_5

|   |             |             |             |
|---|-------------|-------------|-------------|
| C | 2.015485146 | 2.305044168 | 0.828658059 |
| N | 0.773008055 | 2.024702144 | 0.569119040 |

|   |              |              |              |
|---|--------------|--------------|--------------|
| C | 0.594928041  | 0.875735064  | -0.175460015 |
| C | 2.785426200  | 0.844011063  | -0.798698059 |
| N | 3.052281222  | 1.583634113  | 0.377250027  |
| N | 1.586496115  | 0.194075015  | -0.734818052 |
| H | 3.622002259  | 0.349407027  | -1.272119093 |
| N | -0.644991045 | 0.431980030  | -0.275143022 |
| H | -0.803865057 | -0.469712035 | -0.689311047 |
| H | -1.395153099 | 0.928598067  | 0.173147013  |
| H | 2.254362165  | 3.138115227  | 1.474727107  |
| O | -1.096449079 | 3.815684276  | 2.019221148  |
| H | -0.441595033 | 3.297455238  | 1.560113110  |
| H | -0.927557064 | 4.725464339  | 1.814199133  |
| O | -2.974640214 | 2.034308145  | 0.799665057  |
| H | -3.765064270 | 1.779694130  | 1.256867093  |
| H | -2.582611188 | 2.755584197  | 1.287218091  |
| O | -0.924858064 | -2.465726178 | -1.142959081 |
| H | -0.036972000 | -2.749934198 | -1.346330095 |
| H | -1.327105096 | -3.158788230 | -0.634923046 |
| O | 4.690888337  | 3.740524268  | 2.778249202  |
| H | 4.816275346  | 3.715041267  | 3.716883269  |
| H | 5.268087379  | 3.080544219  | 2.406543175  |
| O | 5.905024425  | 1.582050116  | 1.230927089  |
| H | 5.070222364  | 1.444116103  | 0.814559057  |
| H | 6.544081473  | 1.627498118  | 0.522689039  |
| O | 1.970305141  | -2.546565184 | -1.650450118 |
| H | 2.329989166  | -2.581126184 | -2.527422181 |
| H | 1.880007134  | -1.627059118 | -1.416912101 |

Coord\_6

|   |              |              |              |
|---|--------------|--------------|--------------|
| C | 2.026902145  | 2.297722165  | 0.815825061  |
| N | 0.780305054  | 2.009308145  | 0.564708040  |
| C | 0.588535040  | 0.871080061  | -0.178441013 |
| C | 2.797092204  | 0.762947056  | -0.729931053 |
| N | 3.067695219  | 1.589468112  | 0.365213028  |
| N | 1.575814112  | 0.172155012  | -0.730068051 |
| H | 3.629267260  | 0.245622018  | -1.185896084 |
| N | -0.659989050 | 0.449794031  | -0.310259024 |
| H | -0.819977060 | -0.456234034 | -0.712934049 |
| H | -1.406771101 | 0.944228068  | 0.144818012  |
| H | 2.257821163  | 3.139321227  | 1.453268107  |
| O | -1.075695076 | 3.816803274  | 2.022554144  |
| H | -0.427171032 | 3.292509236  | 1.561533110  |
| H | -0.902066067 | 4.724631340  | 1.812872131  |
| O | -2.979337213 | 2.048824149  | 0.816077061  |
| H | -3.762587271 | 1.791395128  | 1.283828092  |
| H | -2.577758188 | 2.764525197  | 1.303749096  |
| O | -0.929291067 | -2.479036177 | -1.141843084 |

|   |              |              |              |
|---|--------------|--------------|--------------|
| H | -0.044683002 | -2.769186200 | -1.349265097 |
| H | -1.336553096 | -3.172352228 | -0.638005048 |
| O | 4.683880337  | 3.755735272  | 2.797948201  |
| H | 4.802543345  | 3.714282268  | 3.736848269  |
| H | 5.263810378  | 3.102249223  | 2.419187172  |
| O | 5.910157424  | 1.623420119  | 1.222451088  |
| H | 5.074311365  | 1.519136111  | 0.792807057  |
| H | 6.558887471  | 1.688697123  | 0.527620039  |
| O | 1.973208144  | -2.555069184 | -1.682706122 |
| H | 2.306472164  | -2.578181186 | -2.570724184 |
| H | 1.863186135  | -1.639442120 | -1.445742106 |

Coord\_7

|   |              |              |              |
|---|--------------|--------------|--------------|
| C | 2.038550146  | 2.291238167  | 0.805003058  |
| N | 0.786776056  | 1.998478146  | 0.562328039  |
| C | 0.581168041  | 0.870828062  | -0.179029014 |
| C | 2.801181204  | 0.688709050  | -0.653779049 |
| N | 3.080424223  | 1.591141117  | 0.354286026  |
| N | 1.565439110  | 0.155000012  | -0.720569050 |
| H | 3.627528261  | 0.148365013  | -1.092690079 |
| N | -0.674308047 | 0.471435036  | -0.344545026 |
| H | -0.835477058 | -0.439256032 | -0.734549055 |
| H | -1.419405102 | 0.962750071  | 0.115444007  |
| H | 2.263901161  | 3.140678228  | 1.433584105  |
| O | -1.066086079 | 3.822105275  | 2.023679143  |
| H | -0.421680029 | 3.293094236  | 1.562454111  |
| H | -0.889555063 | 4.728242340  | 1.809143130  |
| O | -2.988272217 | 2.062378151  | 0.827541061  |
| H | -3.764599272 | 1.800439127  | 1.304149096  |
| H | -2.579870187 | 2.773684202  | 1.315657093  |
| O | -0.927646066 | -2.497971181 | -1.141419080 |
| H | -0.044668005 | -2.790434202 | -1.350790096 |
| H | -1.338732094 | -3.193570230 | -0.643720046 |
| O | 4.687093337  | 3.760837271  | 2.818296204  |
| H | 4.809230346  | 3.704713267  | 3.755948271  |
| H | 5.267773381  | 3.115487222  | 2.427036172  |
| O | 5.915436427  | 1.657609118  | 1.204041085  |
| H | 5.073188366  | 1.584795112  | 0.772449058  |
| H | 6.566108470  | 1.745203125  | 0.517787037  |
| O | 1.983332141  | -2.557452186 | -1.708949123 |
| H | 2.291584164  | -2.567024187 | -2.606447189 |
| H | 1.849594132  | -1.647144120 | -1.466849108 |

Coord\_8

|   |             |             |              |
|---|-------------|-------------|--------------|
| C | 2.049901146 | 2.284367165 | 0.797349060  |
| N | 0.791831059 | 1.991358145 | 0.562501038  |
| C | 0.572259040 | 0.874343063 | -0.176920015 |



|   |              |              |              |
|---|--------------|--------------|--------------|
| C | 2.797246200  | 0.620592047  | -0.569386041 |
| N | 3.090541224  | 1.587581114  | 0.346251025  |
| N | 1.554752111  | 0.141759012  | -0.705577051 |
| H | 3.616006263  | 0.056558004  | -0.991735072 |
| N | -0.688433052 | 0.496489034  | -0.378204028 |
| H | -0.851066059 | -0.419088029 | -0.754390054 |
| H | -1.433585105 | 0.983968073  | 0.084572007  |
| H | 2.272061164  | 3.140874225  | 1.417033102  |
| O | -1.068153077 | 3.831314277  | 2.022692143  |
| H | -0.425598031 | 3.298752236  | 1.563155112  |
| H | -0.890155065 | 4.736001343  | 1.803283132  |
| O | -3.002159215 | 2.075265152  | 0.833110059  |
| H | -3.772109270 | 1.807376128  | 1.316609093  |
| H | -2.589614187 | 2.783235200  | 1.322269094  |
| O | -0.920889066 | -2.523695181 | -1.143106082 |
| H | -0.037885000 | -2.814530203 | -1.352941096 |
| H | -1.334707098 | -3.224681233 | -0.655187047 |
| O | 4.704659339  | 3.758934270  | 2.840015205  |
| H | 4.842849347  | 3.691057266  | 3.774617274  |
| H | 5.283285381  | 3.123266223  | 2.430387177  |
| O | 5.921585424  | 1.686222124  | 1.176600086  |
| H | 5.067119364  | 1.641031117  | 0.756373055  |
| H | 6.564784474  | 1.797027130  | 0.491468036  |
| O | 1.999750145  | -2.553867185 | -1.730279125 |
| H | 2.284991166  | -2.545976183 | -2.635613189 |
| H | 1.838740130  | -1.651178117 | -1.479454104 |

Coord\_9

|   |              |              |              |
|---|--------------|--------------|--------------|
| C | 2.059229149  | 2.274073165  | 0.796848056  |
| N | 0.793954060  | 1.985232141  | 0.567164042  |
| C | 0.561281041  | 0.878621065  | -0.169842010 |
| C | 2.785146202  | 0.555280039  | -0.470728034 |
| N | 3.097486220  | 1.575589111  | 0.347599024  |
| N | 1.543816113  | 0.128880008  | -0.680444047 |
| H | 3.594531261  | -0.033937005 | -0.875709060 |
| N | -0.702407052 | 0.521983037  | -0.410860032 |
| H | -0.866565063 | -0.398865028 | -0.771618054 |
| H | -1.450010105 | 1.005466074  | 0.050954001  |
| H | 2.279876165  | 3.137219224  | 1.407421100  |
| O | -1.085312078 | 3.843389276  | 2.017105143  |
| H | -0.441700032 | 3.307942240  | 1.562609113  |
| H | -0.906601063 | 4.746664344  | 1.792500130  |
| O | -3.022947218 | 2.086103151  | 0.828100058  |
| H | -3.787994272 | 1.811422132  | 1.315461096  |
| H | -2.609567186 | 2.792048203  | 1.319158098  |
| O | -0.912878068 | -2.553692186 | -1.148267084 |
| H | -0.029698004 | -2.839755204 | -1.362235099 |

|   |              |              |              |
|---|--------------|--------------|--------------|
| H | -1.330434097 | -3.267708238 | -0.682821048 |
| O | 4.750859344  | 3.757599273  | 2.867528204  |
| H | 4.929543355  | 3.686387266  | 3.794950275  |
| H | 5.321666385  | 3.133903225  | 2.429594173  |
| O | 5.929975429  | 1.714215124  | 1.139860082  |
| H | 5.054982361  | 1.686213123  | 0.754632052  |
| H | 6.546727470  | 1.846120131  | 0.437748031  |
| O | 2.017567146  | -2.545496183 | -1.751902128 |
| H | 2.285590163  | -2.504650181 | -2.662280193 |
| H | 1.831894132  | -1.655891118 | -1.477034108 |

Coord\_10

|   |              |              |              |
|---|--------------|--------------|--------------|
| C | 2.010404145  | 2.225413158  | 0.765495055  |
| N | 0.733465052  | 1.970661140  | 0.527942038  |
| C | 0.473481037  | 0.886914066  | -0.219420018 |
| C | 2.683538196  | 0.459482034  | -0.411087028 |
| N | 3.035677217  | 1.507145108  | 0.318932022  |
| N | 1.446775102  | 0.107636007  | -0.709087052 |
| H | 3.471976249  | -0.166874013 | -0.800625058 |
| N | -0.794624056 | 0.576531040  | -0.514996040 |
| H | -0.974985073 | -0.343057027 | -0.869526064 |
| H | -1.541119113 | 1.064285077  | -0.057112005 |
| H | 2.243360162  | 3.084142222  | 1.377352101  |
| O | -1.151952084 | 3.867401276  | 1.967531141  |
| H | -0.511431036 | 3.323101237  | 1.519413109  |
| H | -0.955890071 | 4.768363342  | 1.748159125  |
| O | -3.108885222 | 2.151434157  | 0.743146053  |
| H | -3.878275281 | 1.877573136  | 1.223994089  |
| H | -2.688481193 | 2.843955204  | 1.246873089  |
| O | -0.991563074 | -2.610662186 | -1.235090089 |
| H | -0.096889005 | -2.891674207 | -1.401037101 |
| H | -1.415368104 | -3.306666240 | -0.748383056 |
| O | 4.834936348  | 3.676631264  | 2.879494209  |
| H | 5.122060367  | 3.616109262  | 3.780013273  |
| H | 5.373438388  | 3.071854219  | 2.378706171  |
| O | 5.880408423  | 1.667978119  | 1.026812073  |
| H | 4.971025359  | 1.635707118  | 0.740742054  |
| H | 6.411359463  | 1.811739131  | 0.255726017  |
| O | 1.965991140  | -2.557345186 | -1.762375127 |
| H | 2.207905159  | -2.559217182 | -2.678387195 |
| H | 1.716794122  | -1.666433123 | -1.540605113 |

LIIC path connecting Franck-Condon point and  $S_2/S_1$

Coord\_1

|   |             |             |              |
|---|-------------|-------------|--------------|
| C | 2.010404145 | 2.225413158 | 0.765495055  |
| N | 0.733465052 | 1.970661140 | 0.527942038  |
| C | 0.473481037 | 0.886914066 | -0.219420018 |

|   |              |              |              |
|---|--------------|--------------|--------------|
| C | 2.683538196  | 0.459482034  | -0.411087028 |
| N | 3.035677217  | 1.507145108  | 0.318932022  |
| N | 1.446775102  | 0.107636007  | -0.709087052 |
| H | 3.471976249  | -0.166874013 | -0.800625058 |
| N | -0.794624056 | 0.576531040  | -0.514996040 |
| H | -0.974985073 | -0.343057027 | -0.869526064 |
| H | -1.541119113 | 1.064285077  | -0.057112005 |
| H | 2.243360162  | 3.084142222  | 1.377352101  |
| O | -1.151952084 | 3.867401276  | 1.967531141  |
| H | -0.511431036 | 3.323101237  | 1.519413109  |
| H | -0.955890071 | 4.768363342  | 1.748159125  |
| O | -3.108885222 | 2.151434157  | 0.743146053  |
| H | -3.878275281 | 1.877573136  | 1.223994089  |
| H | -2.688481193 | 2.843955204  | 1.246873089  |
| O | -0.991563074 | -2.610662186 | -1.235090089 |
| H | -0.096889005 | -2.891674207 | -1.401037101 |
| H | -1.415368104 | -3.306666240 | -0.748383056 |
| O | 4.834936348  | 3.676631264  | 2.879494209  |
| H | 5.122060367  | 3.616109262  | 3.780013273  |
| H | 5.373438388  | 3.071854219  | 2.378706171  |
| O | 5.880408423  | 1.667978119  | 1.026812073  |
| H | 4.971025359  | 1.635707118  | 0.740742054  |
| H | 6.411359463  | 1.811739131  | 0.255726017  |
| O | 1.965991140  | -2.557345186 | -1.762375127 |
| H | 2.207905159  | -2.559217182 | -2.678387195 |
| H | 1.716794122  | -1.666433123 | -1.540605113 |

Coord\_2

|   |              |              |              |
|---|--------------|--------------|--------------|
| C | 2.015985144  | 2.231212163  | 0.765101056  |
| N | 0.734715053  | 1.961722140  | 0.526398037  |
| C | 0.474444033  | 0.875387061  | -0.217890018 |
| C | 2.689610193  | 0.460494032  | -0.417237031 |
| N | 3.038597217  | 1.510614109  | 0.313558020  |
| N | 1.448453102  | 0.099758008  | -0.711395053 |
| H | 3.480176253  | -0.160799011 | -0.809503060 |
| N | -0.793772060 | 0.559912038  | -0.502044035 |
| H | -0.975039070 | -0.356103024 | -0.866107060 |
| H | -1.541263113 | 1.053772077  | -0.051720006 |
| H | 2.244806160  | 3.088211225  | 1.379540100  |
| O | -1.160500085 | 3.875311280  | 1.972779140  |
| H | -0.510663036 | 3.333843239  | 1.535759109  |
| H | -0.961094069 | 4.777464344  | 1.761145129  |
| O | -3.101496225 | 2.148738153  | 0.735065051  |
| H | -3.875979277 | 1.877636134  | 1.209351088  |
| H | -2.687304192 | 2.845219202  | 1.238443089  |
| O | -1.001176071 | -2.606210186 | -1.242875091 |
| H | -0.106180008 | -2.884800205 | -1.411924102 |

|   |              |              |              |
|---|--------------|--------------|--------------|
| H | -1.418198102 | -3.299771235 | -0.747026055 |
| O | 4.834810346  | 3.680526263  | 2.881109210  |
| H | 5.121408367  | 3.615785263  | 3.781520270  |
| H | 5.372513386  | 3.076664223  | 2.378351172  |
| O | 5.883110423  | 1.673393121  | 1.027894077  |
| H | 4.974847357  | 1.639168117  | 0.738737054  |
| H | 6.416755463  | 1.813057131  | 0.257908021  |
| O | 1.954892139  | -2.564702184 | -1.762001126 |
| H | 2.205529159  | -2.562617183 | -2.675587191 |
| H | 1.715700122  | -1.671942122 | -1.535221110 |

Coord\_3

|   |              |              |              |
|---|--------------|--------------|--------------|
| C | 2.021528144  | 2.237091163  | 0.764738057  |
| N | 0.736052051  | 1.952893140  | 0.524950038  |
| C | 0.475416037  | 0.863983064  | -0.216239017 |
| C | 2.695509196  | 0.461531034  | -0.423347033 |
| N | 3.041405217  | 1.514083109  | 0.308217024  |
| N | 1.450008105  | 0.091915008  | -0.713591049 |
| H | 3.488122252  | -0.154735010 | -0.818349057 |
| N | -0.792778058 | 0.543427040  | -0.489026036 |
| H | -0.974858070 | -0.368966027 | -0.862502061 |
| H | -1.541235109 | 1.043278074  | -0.046319001 |
| H | 2.246395163  | 3.092309221  | 1.381723099  |
| O | -1.168937086 | 3.883246277  | 1.977736144  |
| H | -0.509983038 | 3.344634242  | 1.551989113  |
| H | -0.966414068 | 4.786561345  | 1.773832127  |
| O | -3.093829225 | 2.145921157  | 0.727079052  |
| H | -3.873334279 | 1.877578136  | 1.194755088  |
| H | -2.685828194 | 2.846373206  | 1.229970088  |
| O | -1.010805075 | -2.601904186 | -1.250744089 |
| H | -0.115418008 | -2.877931210 | -1.422724102 |
| H | -1.421040101 | -3.293013235 | -0.746019052 |
| O | 4.834645348  | 3.684451265  | 2.882668208  |
| H | 5.120724369  | 3.615545260  | 3.782954271  |
| H | 5.371510389  | 3.081447223  | 2.377981171  |
| O | 5.885689421  | 1.678721121  | 1.029021076  |
| H | 4.978556360  | 1.642523116  | 0.736786052  |
| H | 6.422019464  | 1.814222131  | 0.260150018  |
| O | 1.943641137  | -2.571797186 | -1.761684128 |
| H | 2.202975159  | -2.565677182 | -2.672750193 |
| H | 1.714332125  | -1.677450122 | -1.529632109 |

Coord\_4

|   |             |             |              |
|---|-------------|-------------|--------------|
| C | 2.027034148 | 2.243053160 | 0.764409057  |
| N | 0.737474051 | 1.944177141 | 0.523602039  |
| C | 0.476394036 | 0.852703064 | -0.214463013 |
| C | 2.701235195 | 0.462596035 | -0.429416029 |

|   |              |              |              |
|---|--------------|--------------|--------------|
| N | 3.044102222  | 1.517554110  | 0.302910022  |
| N | 1.451438106  | 0.084109004  | -0.715670054 |
| H | 3.495812250  | -0.148681011 | -0.827163059 |
| N | -0.791648059 | 0.527080040  | -0.475940033 |
| H | -0.974445068 | -0.381644029 | -0.858721063 |
| H | -1.541044113 | 1.032805074  | -0.040912005 |
| H | 2.248128160  | 3.096440222  | 1.383904098  |
| O | -1.177265087 | 3.891190281  | 1.982427142  |
| H | -0.509396037 | 3.355456240  | 1.568125113  |
| H | -0.971842072 | 4.795635343  | 1.786251129  |
| O | -3.085895223 | 2.142991156  | 0.719182050  |
| H | -3.870357276 | 1.877405138  | 1.180191082  |
| H | -2.684064193 | 2.847417204  | 1.221458086  |
| O | -1.020444076 | -2.597769190 | -1.258685092 |
| H | -0.124593011 | -2.871078205 | -1.433427103 |
| H | -1.423887101 | -3.286428237 | -0.745351055 |
| O | 4.834452347  | 3.688407268  | 2.884169209  |
| H | 5.120021367  | 3.615388258  | 3.784311272  |
| H | 5.370438387  | 3.086202225  | 2.377589173  |
| O | 5.888148423  | 1.683958124  | 1.030184075  |
| H | 4.982155358  | 1.645771116  | 0.734885051  |
| H | 6.427149462  | 1.815229129  | 0.262441017  |
| O | 1.932249137  | -2.578623186 | -1.761423127 |
| H | 2.200251161  | -2.568380183 | -2.669879194 |
| H | 1.712691125  | -1.682955121 | -1.523836110 |

Coord\_5

|   |              |              |              |
|---|--------------|--------------|--------------|
| C | 2.032501147  | 2.249099163  | 0.764116056  |
| N | 0.738976052  | 1.935575137  | 0.522357038  |
| C | 0.477376035  | 0.841550060  | -0.212560018 |
| C | 2.706785196  | 0.463690035  | -0.435442030 |
| N | 3.046685220  | 1.521030111  | 0.297636019  |
| N | 1.452740104  | 0.076342005  | -0.717630052 |
| H | 3.503247254  | -0.142636013 | -0.835947058 |
| N | -0.790385055 | 0.510869039  | -0.462784031 |
| H | -0.973802070 | -0.394134030 | -0.854775063 |
| H | -1.540695110 | 1.022351072  | -0.035497003 |
| H | 2.250003162  | 3.100609223  | 1.386085102  |
| O | -1.185492084 | 3.899121282  | 1.986876141  |
| H | -0.508912036 | 3.366289244  | 1.584190114  |
| H | -0.977375070 | 4.804667346  | 1.798429127  |
| O | -3.077702220 | 2.139953154  | 0.711368049  |
| H | -3.867063280 | 1.877126134  | 1.165641084  |
| H | -2.682018192 | 2.848348206  | 1.212911085  |
| O | -1.030088072 | -2.593827184 | -1.266685093 |
| H | -0.133697008 | -2.864253205 | -1.444023105 |
| H | -1.426732101 | -3.280052234 | -0.745011054 |

|   |             |              |              |
|---|-------------|--------------|--------------|
| O | 4.834243348 | 3.692391268  | 2.885606206  |
| H | 5.119313371 | 3.615312263  | 3.785586272  |
| H | 5.369304387 | 3.090926222  | 2.377170170  |
| O | 5.890488424 | 1.689103124  | 1.031374073  |
| H | 4.985644356 | 1.648908116  | 0.733028052  |
| H | 6.432146461 | 1.816075130  | 0.264773022  |
| O | 1.920730139 | -2.585174184 | -1.761216129 |
| H | 2.197363160 | -2.570707187 | -2.666972191 |
| H | 1.710776123 | -1.688453119 | -1.517829107 |

Coord\_6

|   |              |              |              |
|---|--------------|--------------|--------------|
| C | 2.037933147  | 2.255229163  | 0.763861056  |
| N | 0.740557053  | 1.927091140  | 0.521217037  |
| C | 0.478359035  | 0.830526060  | -0.210526014 |
| C | 2.712157197  | 0.464814034  | -0.441425029 |
| N | 3.049155219  | 1.524512108  | 0.292397021  |
| N | 1.453913105  | 0.068614006  | -0.719469054 |
| H | 3.510425252  | -0.136599010 | -0.844699062 |
| N | -0.788993055 | 0.494798037  | -0.449555033 |
| H | -0.972932071 | -0.406432030 | -0.850672060 |
| H | -1.540196112 | 1.011918073  | -0.030074000 |
| H | 2.252020164  | 3.104821226  | 1.388265101  |
| O | -1.193623088 | 3.907021280  | 1.991109141  |
| H | -0.508538035 | 3.377113242  | 1.600207114  |
| H | -0.983011072 | 4.813641345  | 1.810396132  |
| O | -3.069259223 | 2.136811154  | 0.703630049  |
| H | -3.863466277 | 1.876745137  | 1.151090080  |
| H | -2.679699195 | 2.849164203  | 1.204333085  |
| O | -1.039727073 | -2.590103184 | -1.274732091 |
| H | -0.142721009 | -2.857468206 | -1.454503106 |
| H | -1.429567105 | -3.273923234 | -0.744988056 |
| O | 4.834028349  | 3.696402268  | 2.886975209  |
| H | 5.118611369  | 3.615316258  | 3.786776275  |
| H | 5.368119384  | 3.095616224  | 2.376717173  |
| O | 5.892711423  | 1.694150120  | 1.032583074  |
| H | 4.989022359  | 1.651932121  | 0.731210053  |
| H | 6.437007462  | 1.816753133  | 0.267134020  |
| O | 1.909098140  | -2.591442188 | -1.761061127 |
| H | 2.194320158  | -2.572641187 | -2.664027193 |
| H | 1.708589123  | -1.693940121 | -1.511607110 |

Coord\_7

|   |             |             |              |
|---|-------------|-------------|--------------|
| C | 2.043328146 | 2.261446165 | 0.763645057  |
| N | 0.742215056 | 1.918725139 | 0.520185035  |
| C | 0.479341034 | 0.819632057 | -0.208357017 |
| C | 2.717351193 | 0.465969032 | -0.447364033 |
| N | 3.051509221 | 1.528002111 | 0.287192023  |

|   |              |              |              |
|---|--------------|--------------|--------------|
| N | 1.454954103  | 0.060927002  | -0.721182054 |
| H | 3.517344255  | -0.130569009 | -0.853421062 |
| N | -0.787474057 | 0.478867034  | -0.436250030 |
| H | -0.971836071 | -0.418534028 | -0.846423063 |
| H | -1.539552108 | 1.001506071  | -0.024643001 |
| H | 2.254180165  | 3.109080224  | 1.390447100  |
| O | -1.201667085 | 3.914871280  | 1.995148145  |
| H | -0.508284035 | 3.387910241  | 1.616200115  |
| H | -0.988748073 | 4.822537349  | 1.822180131  |
| O | -3.060574218 | 2.133568155  | 0.695965049  |
| H | -3.859580280 | 1.876265137  | 1.136521079  |
| H | -2.677113190 | 2.849860203  | 1.195730087  |
| O | -1.049356077 | -2.586626188 | -1.282815093 |
| H | -0.151654013 | -2.850739204 | -1.464855104 |
| H | -1.432384106 | -3.268080233 | -0.745273055 |
| O | 4.833819350  | 3.700438266  | 2.888271206  |
| H | 5.117931366  | 3.615398259  | 3.787875270  |
| H | 5.366889386  | 3.100269222  | 2.376223171  |
| O | 5.894819422  | 1.699096123  | 1.033802076  |
| H | 4.992292357  | 1.654839119  | 0.729428054  |
| H | 6.441732465  | 1.817259132  | 0.269515021  |
| O | 1.897365137  | -2.597419187 | -1.760957128 |
| H | 2.191133156  | -2.574161185 | -2.661045194 |
| H | 1.706127121  | -1.699414121 | -1.505165107 |

Coord\_8

|   |              |              |              |
|---|--------------|--------------|--------------|
| C | 2.048690145  | 2.267750164  | 0.763469053  |
| N | 0.743948053  | 1.910481139  | 0.519264039  |
| C | 0.480320033  | 0.808871058  | -0.206051016 |
| C | 2.722365195  | 0.467155035  | -0.453259031 |
| N | 3.053749218  | 1.531501110  | 0.282021020  |
| N | 1.455862107  | 0.053283005  | -0.722768051 |
| H | 3.524004253  | -0.124546009 | -0.862113063 |
| N | -0.785833057 | 0.463077031  | -0.422868032 |
| H | -0.970515070 | -0.430435029 | -0.842036062 |
| H | -1.538769111 | 0.991114072  | -0.019205001 |
| H | 2.256483160  | 3.113389224  | 1.392630099  |
| O | -1.209631086 | 3.922654282  | 1.999020145  |
| H | -0.508161038 | 3.398661244  | 1.632194116  |
| H | -0.994589073 | 4.831338350  | 1.833811130  |
| O | -3.051653221 | 2.130227152  | 0.688366048  |
| H | -3.855415279 | 1.875692133  | 1.121920079  |
| H | -2.674269191 | 2.850434207  | 1.187105085  |
| O | -1.058967079 | -2.583422184 | -1.290924094 |
| H | -0.160488014 | -2.844080207 | -1.475071104 |
| H | -1.435175103 | -3.262561232 | -0.745856055 |
| O | 4.833627349  | 3.704498267  | 2.889487208  |

|   |             |              |              |
|---|-------------|--------------|--------------|
| H | 5.117286368 | 3.615555261  | 3.788877273  |
| H | 5.365625388 | 3.104882224  | 2.375682171  |
| O | 5.896815426 | 1.703936121  | 1.035024073  |
| H | 4.995453360 | 1.657625121  | 0.727674053  |
| H | 6.446320463 | 1.817586132  | 0.271906019  |
| O | 1.885546138 | -2.603100190 | -1.760900125 |
| H | 2.187809156 | -2.575250184 | -2.658021190 |
| H | 1.703393121 | -1.704871124 | -1.498501109 |

Coord\_9

|   |              |              |              |
|---|--------------|--------------|--------------|
| C | 2.054021146  | 2.274143165  | 0.763334054  |
| N | 0.745756056  | 1.902360137  | 0.518455038  |
| C | 0.481297032  | 0.798244057  | -0.203604016 |
| C | 2.727198198  | 0.468373032  | -0.459108032 |
| N | 3.055874219  | 1.535011111  | 0.276884021  |
| N | 1.456636103  | 0.045683004  | -0.724222050 |
| H | 3.530404255  | -0.118530010 | -0.870774065 |
| N | -0.784071055 | 0.447428032  | -0.409406027 |
| H | -0.968969068 | -0.442131031 | -0.837520058 |
| H | -1.537850110 | 0.980743071  | -0.013759000 |
| H | 2.258930160  | 3.117753222  | 1.394814098  |
| O | -1.217526088 | 3.930353281  | 2.002748146  |
| H | -0.508181036 | 3.409349244  | 1.648213121  |
| H | -1.000537073 | 4.840028351  | 1.845319131  |
| O | -3.042504217 | 2.126789151  | 0.680829050  |
| H | -3.850983277 | 1.875025137  | 1.107269082  |
| H | -2.671174192 | 2.850882203  | 1.178464086  |
| O | -1.068552077 | -2.580521186 | -1.299050092 |
| H | -0.169212014 | -2.837508206 | -1.485139109 |
| H | -1.437933106 | -3.257410237 | -0.746729054 |
| O | 4.833465346  | 3.708579266  | 2.890620208  |
| H | 5.116689366  | 3.615787258  | 3.789777271  |
| H | 5.364337386  | 3.109452225  | 2.375086170  |
| O | 5.898702424  | 1.708667124  | 1.036238075  |
| H | 4.998508359  | 1.660287120  | 0.725945051  |
| H | 6.450771463  | 1.817727131  | 0.274298022  |
| O | 1.873656134  | -2.608477187 | -1.760887129 |
| H | 2.184361159  | -2.575886186 | -2.654953189 |
| H | 1.700386124  | -1.710309124 | -1.491610105 |

Coord\_10

|   |             |             |              |
|---|-------------|-------------|--------------|
| C | 2.060445146 | 2.282308163 | 0.775020055  |
| N | 0.748986053 | 1.894929139 | 0.530101039  |
| C | 0.484232034 | 0.790414060 | -0.192116012 |
| C | 2.733902196 | 0.476579036 | -0.460365035 |
| N | 3.059404218 | 1.543423109 | 0.279551021  |
| N | 1.459598104 | 0.044074004 | -0.720645050 |



|   |              |              |              |
|---|--------------|--------------|--------------|
| H | 3.538865254  | -0.102917006 | -0.878035064 |
| N | -0.779972054 | 0.433360029  | -0.386366026 |
| H | -0.964289067 | -0.450938033 | -0.826183060 |
| H | -1.534823111 | 0.969351071  | 0.004144003  |
| H | 2.262306163  | 3.121963224  | 1.411395100  |
| O | -1.224910090 | 3.930384281  | 2.028615145  |
| H | -0.507626035 | 3.414655246  | 1.683714120  |
| H | -1.007725073 | 4.841864347  | 1.881828134  |
| O | -3.031892219 | 2.117598151  | 0.691950049  |
| H | -3.844069275 | 1.865938137  | 1.111465082  |
| H | -2.666964190 | 2.844367206  | 1.190400086  |
| O | -1.072698075 | -2.573787184 | -1.307675094 |
| H | -0.172309013 | -2.824868204 | -1.497719107 |
| H | -1.433421103 | -3.250974235 | -0.750194054 |
| O | 4.835406347  | 3.711157270  | 2.904373207  |
| H | 5.119665369  | 3.611883258  | 3.802531274  |
| H | 5.365238384  | 3.115043226  | 2.384304173  |
| O | 5.902844427  | 1.719795124  | 1.041696078  |
| H | 5.003443360  | 1.669064118  | 0.729622050  |
| H | 6.456185465  | 1.827653131  | 0.280503022  |
| O | 1.866502134  | -2.603386189 | -1.765776128 |
| H | 2.184240157  | -2.562330184 | -2.657024193 |
| H | 1.700955122  | -1.706777125 | -1.486005107 |

LIIC path connecting S<sub>2</sub>/S<sub>1</sub> and S2-MIN

Coord\_1

|   |              |              |              |
|---|--------------|--------------|--------------|
| C | 2.060445146  | 2.282308163  | 0.775020055  |
| N | 0.748986053  | 1.894929139  | 0.530101039  |
| C | 0.484232034  | 0.790414060  | -0.192116012 |
| C | 2.733902196  | 0.476579036  | -0.460365035 |
| N | 3.059404218  | 1.543423109  | 0.279551021  |
| N | 1.459598104  | 0.044074004  | -0.720645050 |
| H | 3.538865254  | -0.102917006 | -0.878035064 |
| N | -0.779972054 | 0.433360029  | -0.386366026 |
| H | -0.964289067 | -0.450938033 | -0.826183060 |
| H | -1.534823111 | 0.969351071  | 0.004144003  |
| H | 2.262306163  | 3.121963224  | 1.411395100  |
| O | -1.224910090 | 3.930384281  | 2.028615145  |
| H | -0.507626035 | 3.414655246  | 1.683714120  |
| H | -1.007725073 | 4.841864347  | 1.881828134  |
| O | -3.031892219 | 2.117598151  | 0.691950049  |
| H | -3.844069275 | 1.865938137  | 1.111465082  |
| H | -2.666964190 | 2.844367206  | 1.190400086  |
| O | -1.072698075 | -2.573787184 | -1.307675094 |
| H | -0.172309013 | -2.824868204 | -1.497719107 |
| H | -1.433421103 | -3.250974235 | -0.750194054 |
| O | 4.835406347  | 3.711157270  | 2.904373207  |

|   |             |              |              |
|---|-------------|--------------|--------------|
| H | 5.119665369 | 3.611883258  | 3.802531274  |
| H | 5.365238384 | 3.115043226  | 2.384304173  |
| O | 5.902844427 | 1.719795124  | 1.041696078  |
| H | 5.003443360 | 1.669064118  | 0.729622050  |
| H | 6.456185465 | 1.827653131  | 0.280503022  |
| O | 1.866502134 | -2.603386189 | -1.765776128 |
| H | 2.184240157 | -2.562330184 | -2.657024193 |
| H | 1.700955122 | -1.706777125 | -1.486005107 |

Coord\_2

|   |              |              |              |
|---|--------------|--------------|--------------|
| C | 2.061352150  | 2.260819164  | 0.781674057  |
| N | 0.744373051  | 1.901330136  | 0.535851037  |
| C | 0.468883031  | 0.803449060  | -0.187289016 |
| C | 2.730593198  | 0.487863037  | -0.503307038 |
| N | 3.057499222  | 1.535198112  | 0.270861021  |
| N | 1.443389103  | 0.053686006  | -0.712015053 |
| H | 3.530942253  | -0.095236008 | -0.924166065 |
| N | -0.795110058 | 0.446491034  | -0.383904029 |
| H | -0.977328068 | -0.437808034 | -0.823391057 |
| H | -1.549161110 | 0.977881069  | 0.013910001  |
| H | 2.272135165  | 3.090381222  | 1.429600104  |
| O | -1.219082086 | 3.920962285  | 2.022125146  |
| H | -0.507563036 | 3.401118246  | 1.669444120  |
| H | -1.001121073 | 4.831017346  | 1.868317132  |
| O | -3.048644219 | 2.124141153  | 0.701032048  |
| H | -3.855080278 | 1.873964136  | 1.132180080  |
| H | -2.672179195 | 2.846694205  | 1.197318084  |
| O | -1.038621076 | -2.572249183 | -1.289547090 |
| H | -0.134918010 | -2.815619202 | -1.472730108 |
| H | -1.401065099 | -3.255667233 | -0.740905051 |
| O | 4.839820347  | 3.712291265  | 2.906954211  |
| H | 5.128036371  | 3.620205263  | 3.804624275  |
| H | 5.363014385  | 3.107692224  | 2.390031172  |
| O | 5.895444423  | 1.706761123  | 1.050321074  |
| H | 4.997089360  | 1.656778120  | 0.734244054  |
| H | 6.450620462  | 1.825479133  | 0.292072022  |
| O | 1.866424133  | -2.603154187 | -1.765604125 |
| H | 2.184260155  | -2.562299185 | -2.657086192 |
| H | 1.701015120  | -1.707042121 | -1.486117107 |

Coord\_3

|   |             |             |              |
|---|-------------|-------------|--------------|
| C | 2.061702148 | 2.239459163 | 0.787193058  |
| N | 0.739618055 | 1.907931135 | 0.541119039  |
| C | 0.453585030 | 0.816264061 | -0.182336012 |
| C | 2.725406197 | 0.500855037 | -0.546328037 |
| N | 3.054991218 | 1.526932109 | 0.261816021  |
| N | 1.427959104 | 0.063736002 | -0.702777052 |

|   |              |              |              |
|---|--------------|--------------|--------------|
| H | 3.519943251  | -0.087114005 | -0.970779071 |
| N | -0.810191059 | 0.459466031  | -0.381236028 |
| H | -0.990722074 | -0.424957028 | -0.820045059 |
| H | -1.563355115 | 0.986411073  | 0.023662002  |
| H | 2.281401164  | 3.058829219  | 1.446314104  |
| O | -1.212450087 | 3.912375283  | 2.013533143  |
| H | -0.507004034 | 3.388055246  | 1.653300118  |
| H | -0.993685069 | 4.820830345  | 1.852072132  |
| O | -3.064986223 | 2.131165155  | 0.709847051  |
| H | -3.865487279 | 1.882899135  | 1.152825083  |
| H | -2.676790191 | 2.849670208  | 1.203262089  |
| O | -1.002368074 | -2.569651187 | -1.271660090 |
| H | -0.095208004 | -2.803967201 | -1.448354103 |
| H | -1.365140097 | -3.260295237 | -0.732412053 |
| O | 4.843532351  | 3.712444266  | 2.909638209  |
| H | 5.135363369  | 3.627222259  | 3.806814275  |
| H | 5.360020385  | 3.099365223  | 2.396005171  |
| O | 5.887148426  | 1.692589121  | 1.059363078  |
| H | 4.989937360  | 1.643731117  | 0.739016052  |
| H | 6.444406466  | 1.821967132  | 0.304378023  |
| O | 1.866345132  | -2.602922185 | -1.765432126 |
| H | 2.184280158  | -2.562267185 | -2.657147190 |
| H | 1.701074124  | -1.707306122 | -1.486228108 |

Coord\_4

|   |              |              |              |
|---|--------------|--------------|--------------|
| C | 2.061534150  | 2.218274160  | 0.791514055  |
| N | 0.734763055  | 1.914765136  | 0.545830039  |
| C | 0.438377032  | 0.828852061  | -0.177294011 |
| C | 2.718399197  | 0.515480036  | -0.589299045 |
| N | 3.051922218  | 1.518570109  | 0.252414018  |
| N | 1.413378101  | 0.074240007  | -0.692934049 |
| H | 3.505843255  | -0.078759006 | -1.017613073 |
| N | -0.825181058 | 0.472264035  | -0.378362029 |
| H | -1.004441073 | -0.412429032 | -0.816107060 |
| H | -1.577362114 | 0.994939071  | 0.033398001  |
| H | 2.290144167  | 3.027395217  | 1.461436106  |
| O | -1.205081088 | 3.904734281  | 2.002647142  |
| H | -0.506011039 | 3.375580242  | 1.635108116  |
| H | -0.985550070 | 4.811401349  | 1.832830130  |
| O | -3.080914220 | 2.138634154  | 0.718379050  |
| H | -3.875248282 | 1.892709134  | 1.173430086  |
| H | -2.680820193 | 2.853304205  | 1.208154089  |
| O | -0.963923072 | -2.565852187 | -1.254187091 |
| H | -0.053203004 | -2.789761199 | -1.424830100 |
| H | -1.325559094 | -3.264722233 | -0.724916050 |
| O | 4.846554350  | 3.711668270  | 2.912357211  |
| H | 5.141627368  | 3.633035261  | 3.809061273  |

|   |             |              |              |
|---|-------------|--------------|--------------|
| H | 5.356254384 | 3.090068224  | 2.402211171  |
| O | 5.877953421 | 1.677187121  | 1.068909076  |
| H | 4.982000357 | 1.629842119  | 0.743995055  |
| H | 6.437582461 | 1.816956131  | 0.317527024  |
| O | 1.866266137 | -2.602689189 | -1.765260128 |
| H | 2.184300155 | -2.562236186 | -2.657208193 |
| H | 1.701133122 | -1.707571124 | -1.486339108 |

Coord\_5

|   |              |              |              |
|---|--------------|--------------|--------------|
| C | 2.060898148  | 2.197314158  | 0.794573059  |
| N | 0.729867054  | 1.921865139  | 0.549898041  |
| C | 0.423313028  | 0.841207058  | -0.172202013 |
| C | 2.709653194  | 0.531655037  | -0.632093048 |
| N | 3.048351219  | 1.510057107  | 0.242653016  |
| N | 1.399729101  | 0.085215005  | -0.682490048 |
| H | 3.488606253  | -0.070413007 | -1.064401078 |
| N | -0.840025062 | 0.484862036  | -0.375283027 |
| H | -1.018436076 | -0.400269031 | -0.811532058 |
| H | -1.591125115 | 1.003467075  | 0.043117002  |
| H | 2.298410164  | 2.996176215  | 1.474867106  |
| O | -1.197065084 | 3.898150279  | 1.989271144  |
| H | -0.504657038 | 3.363814240  | 1.614701115  |
| H | -0.976882072 | 4.802823348  | 1.810332128  |
| O | -3.096420225 | 2.146490155  | 0.726612053  |
| H | -3.884312278 | 1.903339136  | 1.194012086  |
| H | -2.684299195 | 2.857587207  | 1.211911089  |
| O | -0.923285064 | -2.560712182 | -1.237307088 |
| H | -0.008955002 | -2.772860199 | -1.402403103 |
| H | -1.282258092 | -3.268799237 | -0.718630049 |
| O | 4.848898351  | 3.710018268  | 2.915044209  |
| H | 5.146807372  | 3.637750262  | 3.811321273  |
| H | 5.351714387  | 3.079808224  | 2.408638172  |
| O | 5.867859424  | 1.660471121  | 1.079058076  |
| H | 4.973300360  | 1.615030115  | 0.749244054  |
| H | 6.430194464  | 1.810289132  | 0.331632022  |
| O | 1.866187136  | -2.602456187 | -1.765088129 |
| H | 2.184319158  | -2.562204187 | -2.657269192 |
| H | 1.701192125  | -1.707835125 | -1.486450108 |

Coord\_6

|   |             |              |              |
|---|-------------|--------------|--------------|
| C | 2.059861146 | 2.176636155  | 0.796304056  |
| N | 0.725006053 | 1.929269139  | 0.553233038  |
| C | 0.408467029 | 0.853322063  | -0.167099014 |
| C | 2.699268196 | 0.549290038  | -0.674593051 |
| N | 3.044350220 | 1.501335107  | 0.232525018  |
| N | 1.387116098 | 0.096677006  | -0.671446050 |
| H | 3.468181249 | -0.062356003 | -1.110863079 |

|   |              |              |              |
|---|--------------|--------------|--------------|
| N | -0.854654061 | 0.497232036  | -0.371998027 |
| H | -1.032637076 | -0.388525027 | -0.806270057 |
| H | -1.604562116 | 1.011994073  | 0.052820002  |
| H | 2.306263165  | 2.965281212  | 1.486502105  |
| O | -1.188510087 | 3.892727281  | 1.973214145  |
| H | -0.503031035 | 3.352876241  | 1.591920113  |
| H | -0.967880069 | 4.795189347  | 1.784326130  |
| O | -3.111491224 | 2.154658154  | 0.734525052  |
| H | -3.892624282 | 1.914708139  | 1.214578089  |
| H | -2.687259196 | 2.862495204  | 1.214447086  |
| O | -0.880477064 | -2.554093186 | -1.221205087 |
| H | 0.037455002  | -2.753142197 | -1.381322099 |
| H | -1.235205090 | -3.272357235 | -0.713776049 |
| O | 4.850578351  | 3.707554266  | 2.917628208  |
| H | 5.150884371  | 3.641476262  | 3.813551273  |
| H | 5.346402384  | 3.068600223  | 2.415275176  |
| O | 5.856873423  | 1.642356119  | 1.089912078  |
| H | 4.963863357  | 1.599220114  | 0.754828054  |
| H | 6.422298462  | 1.801812131  | 0.346812027  |
| O | 1.866109135  | -2.602223190 | -1.764916125 |
| H | 2.184339155  | -2.562173182 | -2.657330190 |
| H | 1.701251123  | -1.708100121 | -1.486561108 |

Coord\_7

|   |              |              |              |
|---|--------------|--------------|--------------|
| C | 2.058507151  | 2.156301154  | 0.796637057  |
| N | 0.720272054  | 1.937020141  | 0.555730040  |
| C | 0.393933028  | 0.865190065  | -0.162029009 |
| C | 2.687368196  | 0.568293042  | -0.716692054 |
| N | 3.040008221  | 1.492344105  | 0.222020014  |
| N | 1.375657098  | 0.108649006  | -0.659803050 |
| H | 3.444487248  | -0.054904002 | -1.156716081 |
| N | -0.868976063 | 0.509347035  | -0.368505029 |
| H | -1.046953078 | -0.377252027 | -0.800261059 |
| H | -1.617573118 | 1.020520071  | 0.062505004  |
| H | 2.313779165  | 2.934829210  | 1.496232108  |
| O | -1.179551085 | 3.888561281  | 1.954302138  |
| H | -0.501234034 | 3.342886243  | 1.566626113  |
| H | -0.958775072 | 4.788575346  | 1.754579124  |
| O | -3.126112222 | 2.163038157  | 0.742091054  |
| H | -3.900122279 | 1.926706137  | 1.235126089  |
| H | -2.689745196 | 2.867987207  | 1.215680090  |
| O | -0.835545058 | -2.545863183 | -1.206066088 |
| H | 0.085918007  | -2.730509196 | -1.361834100 |
| H | -1.184400084 | -3.275219237 | -0.710580051 |
| O | 4.851612348  | 3.704339265  | 2.920039209  |
| H | 5.153837371  | 3.644329263  | 3.815702273  |
| H | 5.340323386  | 3.056462220  | 2.422113173  |

|   |             |              |              |
|---|-------------|--------------|--------------|
| O | 5.845006422 | 1.622769115  | 1.101583077  |
| H | 4.953731359 | 1.582338116  | 0.760818054  |
| H | 6.413956464 | 1.791374131  | 0.363197027  |
| O | 1.866030134 | -2.601990188 | -1.764744127 |
| H | 2.184359158 | -2.562141183 | -2.657391193 |
| H | 1.701310121 | -1.708364122 | -1.486672109 |

Coord\_8

|   |              |              |              |
|---|--------------|--------------|--------------|
| C | 2.056938151  | 2.136378155  | 0.795496056  |
| N | 0.715779054  | 1.945166142  | 0.557274042  |
| C | 0.379825030  | 0.876806061  | -0.157037011 |
| C | 2.674102193  | 0.588571040  | -0.758295054 |
| N | 3.035433219  | 1.483025109  | 0.211121016  |
| N | 1.365495096  | 0.121159010  | -0.647567048 |
| H | 3.417399247  | -0.048410003 | -1.201665085 |
| N | -0.882877063 | 0.521173036  | -0.364799026 |
| H | -1.061269074 | -0.366507025 | -0.793440059 |
| H | -1.630037116 | 1.029044074  | 0.072171003  |
| H | 2.321053167  | 2.904952212  | 1.503941110  |
| O | -1.170343083 | 3.885732278  | 1.932379140  |
| H | -0.499379035 | 3.333950238  | 1.538708113  |
| H | -0.949832066 | 4.783044343  | 1.720893124  |
| O | -3.140261226 | 2.171512158  | 0.749285054  |
| H | -3.906740281 | 1.939201139  | 1.255638090  |
| H | -2.691803193 | 2.874000206  | 1.215528089  |
| O | -0.788556055 | -2.535904183 | -1.192070085 |
| H | 0.136294009  | -2.704889196 | -1.344183096 |
| H | -1.129879079 | -3.277195238 | -0.709265051 |
| O | 4.852022349  | 3.700441266  | 2.922203210  |
| H | 5.155643373  | 3.646431261  | 3.817726275  |
| H | 5.333483384  | 3.043422218  | 2.429148177  |
| O | 5.832275418  | 1.601639115  | 1.114192080  |
| H | 4.942948357  | 1.564316111  | 0.767287056  |
| H | 6.405236459  | 1.778835128  | 0.380926025  |
| O | 1.865951133  | -2.601757186 | -1.764572129 |
| H | 2.184378156  | -2.562110184 | -2.657452192 |
| H | 1.701369124  | -1.708629124 | -1.486783109 |

Coord\_9

|   |              |              |              |
|---|--------------|--------------|--------------|
| C | 2.055276148  | 2.116950153  | 0.792799056  |
| N | 0.711659049  | 1.953766140  | 0.557736040  |
| C | 0.366281024  | 0.888169063  | -0.152176010 |
| C | 2.659637191  | 0.610036046  | -0.799325055 |
| N | 3.030746216  | 1.473322104  | 0.199803015  |
| N | 1.356788098  | 0.134246008  | -0.634748047 |
| H | 3.386721244  | -0.043259002 | -1.245411088 |
| N | -0.896224066 | 0.532679037  | -0.360877024 |

|   |              |              |              |
|---|--------------|--------------|--------------|
| H | -1.075445076 | -0.356347028 | -0.785731058 |
| H | -1.641807118 | 1.037568077  | 0.081816005  |
| H | 2.328193170  | 2.875803208  | 1.509507107  |
| O | -1.161061081 | 3.884299282  | 1.907325137  |
| H | -0.497588034 | 3.326163242  | 1.508087107  |
| H | -0.941339068 | 4.778636344  | 1.683112123  |
| O | -3.153908226 | 2.179937158  | 0.756079055  |
| H | -3.912408283 | 1.952029142  | 1.276086091  |
| H | -2.693485193 | 2.880447209  | 1.213923089  |
| O | -0.739603053 | -2.524115183 | -1.179386087 |
| H | 0.188417015  | -2.676245191 | -1.328601096 |
| H | -1.071716075 | -3.278093235 | -0.710048054 |
| O | 4.851827347  | 3.695931268  | 2.924049208  |
| H | 5.156278370  | 3.647906263  | 3.819575274  |
| H | 5.325889383  | 3.029511217  | 2.436380178  |
| O | 5.818698418  | 1.578909116  | 1.127865084  |
| H | 4.931569353  | 1.545094113  | 0.774312058  |
| H | 6.396212463  | 1.764059128  | 0.400149029  |
| O | 1.865873133  | -2.601524189 | -1.764400125 |
| H | 2.184398159  | -2.562078184 | -2.657513190 |
| H | 1.701428122  | -1.708893125 | -1.486894109 |

Coord\_10

|   |              |              |              |
|---|--------------|--------------|--------------|
| C | 2.036715145  | 2.118517152  | 0.743930056  |
| N | 0.686605052  | 1.995646143  | 0.532741041  |
| C | 0.315451025  | 0.960504068  | -0.204825013 |
| C | 2.591971185  | 0.714465054  | -0.949486069 |
| N | 2.995698215  | 1.504382110  | 0.101718006  |
| N | 1.300239095  | 0.225188018  | -0.725457055 |
| H | 3.289289234  | 0.057686004  | -1.435800104 |
| N | -0.951704068 | 0.616501047  | -0.403698031 |
| H | -1.142876080 | -0.257077017 | -0.854064060 |
| H | -1.685431120 | 1.103268078  | 0.077084006  |
| H | 2.334283169  | 2.839158202  | 1.490787107  |
| O | -1.142089082 | 3.870173276  | 1.961443142  |
| H | -0.495685034 | 3.319576239  | 1.523747108  |
| H | -0.925355068 | 4.769077345  | 1.753469127  |
| O | -3.183215231 | 2.222876161  | 0.819226057  |
| H | -3.923897282 | 1.981517142  | 1.358319098  |
| H | -2.700484192 | 2.903183209  | 1.284867094  |
| O | -0.756807055 | -2.405244172 | -1.334464094 |
| H | 0.170740013  | -2.536104181 | -1.504013109 |
| H | -1.072007075 | -3.188468231 | -0.902935066 |
| O | 4.878645352  | 3.621721261  | 2.887091210  |
| H | 5.199803373  | 3.544917253  | 3.774676272  |
| H | 5.333864386  | 2.963212214  | 2.371416172  |
| O | 5.791491415  | 1.552241112  | 1.006956073  |

|   |             |              |              |
|---|-------------|--------------|--------------|
| H | 4.900191354 | 1.538340113  | 0.661959050  |
| H | 6.361237456 | 1.770437127  | 0.282273019  |
| O | 2.293415165 | -2.555388183 | -1.654684118 |
| H | 2.835968205 | -3.228916233 | -2.045995146 |
| H | 2.653949192 | -2.369708173 | -0.797194058 |

LIIC path connecting S2-MIN and S<sub>1</sub>/S<sub>0</sub>

Coord\_1

|   |              |              |              |
|---|--------------|--------------|--------------|
| C | 2.036715145  | 2.118517152  | 0.743930056  |
| N | 0.686605052  | 1.995646143  | 0.532741041  |
| C | 0.315451025  | 0.960504068  | -0.204825013 |
| C | 2.591971185  | 0.714465054  | -0.949486069 |
| N | 2.995698215  | 1.504382110  | 0.101718006  |
| N | 1.300239095  | 0.225188018  | -0.725457055 |
| H | 3.289289234  | 0.057686004  | -1.435800104 |
| N | -0.951704068 | 0.616501047  | -0.403698031 |
| H | -1.142876080 | -0.257077017 | -0.854064060 |
| H | -1.685431120 | 1.103268078  | 0.077084006  |
| H | 2.334283169  | 2.839158202  | 1.490787107  |
| O | -1.142089082 | 3.870173276  | 1.961443142  |
| H | -0.495685034 | 3.319576239  | 1.523747108  |
| H | -0.925355068 | 4.769077345  | 1.753469127  |
| O | -3.183215231 | 2.222876161  | 0.819226057  |
| H | -3.923897282 | 1.981517142  | 1.358319098  |
| H | -2.700484192 | 2.903183209  | 1.284867094  |
| O | -0.756807055 | -2.405244172 | -1.334464094 |
| H | 0.170740013  | -2.536104181 | -1.504013109 |
| H | -1.072007075 | -3.188468231 | -0.902935066 |
| O | 4.878645352  | 3.621721261  | 2.887091210  |
| H | 5.199803373  | 3.544917253  | 3.774676272  |
| H | 5.333864386  | 2.963212214  | 2.371416172  |
| O | 5.791491415  | 1.552241112  | 1.006956073  |
| H | 4.900191354  | 1.538340113  | 0.661959050  |
| H | 6.361237456  | 1.770437127  | 0.282273019  |
| O | 2.293415165  | -2.555388183 | -1.654684118 |
| H | 2.835968205  | -3.228916233 | -2.045995146 |
| H | 2.653949192  | -2.369708173 | -0.797194058 |

Coord\_2

|   |              |             |              |
|---|--------------|-------------|--------------|
| C | 2.047597146  | 2.126931155 | 0.751383052  |
| N | 0.706574053  | 1.996100145 | 0.535250039  |
| C | 0.362512028  | 0.947893071 | -0.200867016 |
| C | 2.626847188  | 0.739464054 | -0.970650068 |
| N | 3.012139217  | 1.496351110 | 0.121918009  |
| N | 1.353265095  | 0.213205016 | -0.720134050 |
| H | 3.340223243  | 0.103526009 | -1.462738104 |
| N | -0.902626063 | 0.586787040 | -0.390740030 |



|   |              |              |              |
|---|--------------|--------------|--------------|
| H | -1.101089080 | -0.286593021 | -0.844134059 |
| H | -1.646146118 | 1.073231078  | 0.077217004  |
| H | 2.345851169  | 2.852683205  | 1.493455108  |
| O | -1.163887084 | 3.859675278  | 1.967856140  |
| H | -0.504851034 | 3.319107240  | 1.536744109  |
| H | -0.957496071 | 4.762112340  | 1.764759129  |
| O | -3.159655228 | 2.184003160  | 0.791237057  |
| H | -3.909554282 | 1.936984141  | 1.314602093  |
| H | -2.695492193 | 2.871915205  | 1.264910090  |
| O | -0.824801061 | -2.431345173 | -1.332118098 |
| H | 0.095591007  | -2.590504184 | -1.508786108 |
| H | -1.162891082 | -3.197126232 | -0.886804066 |
| O | 4.884085352  | 3.626804262  | 2.873141208  |
| H | 5.192570372  | 3.560721258  | 3.766154269  |
| H | 5.348672385  | 2.964043213  | 2.371623170  |
| O | 5.817304417  | 1.532143108  | 1.034447074  |
| H | 4.928102353  | 1.499990108  | 0.685626047  |
| H | 6.391121460  | 1.722665122  | 0.305149023  |
| O | 2.200469161  | -2.615715188 | -1.652880121 |
| H | 2.780349200  | -3.240953232 | -2.073647150 |
| H | 2.557542183  | -2.338374170 | -0.824540060 |

Coord\_3

|   |              |              |              |
|---|--------------|--------------|--------------|
| C | 2.056123149  | 2.134875154  | 0.758555054  |
| N | 0.724060053  | 1.996440141  | 0.537882040  |
| C | 0.405905028  | 0.935016066  | -0.196408015 |
| C | 2.656275190  | 0.767871056  | -0.991030071 |
| N | 3.025203217  | 1.488029110  | 0.141306010  |
| N | 1.403510099  | 0.202709013  | -0.713638050 |
| H | 3.384315244  | 0.153988013  | -1.490904108 |
| N | -0.856403060 | 0.556741039  | -0.375781026 |
| H | -1.060939074 | -0.317187023 | -0.830634060 |
| H | -1.608847118 | 1.043403076  | 0.079424007  |
| H | 2.355566170  | 2.865230204  | 1.496017109  |
| O | -1.183654087 | 3.850329277  | 1.968889142  |
| H | -0.513378038 | 3.318649237  | 1.544237110  |
| H | -0.987324073 | 4.755619341  | 1.768588129  |
| O | -3.136548228 | 2.146407153  | 0.765097056  |
| H | -3.894724280 | 1.894898134  | 1.274070090  |
| H | -2.689912194 | 2.842149207  | 1.244493087  |
| O | -0.885148064 | -2.452079179 | -1.326342097 |
| H | 0.028292001  | -2.637132187 | -1.508145111 |
| H | -1.243364088 | -3.201350231 | -0.868777061 |
| O | 4.886882350  | 3.629812259  | 2.858427207  |
| H | 5.184400373  | 3.574539256  | 3.755964268  |
| H | 5.360739388  | 2.963942214  | 2.370004168  |
| O | 5.839605423  | 1.512628110  | 1.059120075  |

|   |             |              |              |
|---|-------------|--------------|--------------|
| H | 4.951970358 | 1.461442107  | 0.709102049  |
| H | 6.415846463 | 1.676263119  | 0.325186024  |
| O | 2.115574154 | -2.663103191 | -1.647236117 |
| H | 2.726549199 | -3.236847234 | -2.099751151 |
| H | 2.467849179 | -2.295354166 | -0.857321061 |

Coord\_4

|   |              |              |              |
|---|--------------|--------------|--------------|
| C | 2.061937150  | 2.142939153  | 0.765415054  |
| N | 0.738698054  | 1.997326143  | 0.540662041  |
| C | 0.445101033  | 0.922412064  | -0.191410015 |
| C | 2.679281192  | 0.800076058  | -1.010468074 |
| N | 3.034339219  | 1.479741109  | 0.159824012  |
| N | 1.450288103  | 0.194109015  | -0.705987052 |
| H | 3.420513249  | 0.209523017  | -1.520228111 |
| N | -0.813464057 | 0.526929039  | -0.358830028 |
| H | -1.022331074 | -0.348287024 | -0.813743061 |
| H | -1.573909116 | 1.014423071  | 0.083753005  |
| H | 2.363128171  | 2.877472206  | 1.498349108  |
| O | -1.201011085 | 3.842524278  | 1.964995143  |
| H | -0.520958036 | 3.318482239  | 1.546505111  |
| H | -1.014215072 | 4.750006342  | 1.765544127  |
| O | -3.114162225 | 2.110832155  | 0.741020052  |
| H | -3.879800280 | 1.856065134  | 1.236978088  |
| H | -2.683793196 | 2.814541204  | 1.223944087  |
| O | -0.935955065 | -2.468016177 | -1.317161094 |
| H | -0.028849003 | -2.675958192 | -1.502057106 |
| H | -1.311359094 | -3.202230232 | -0.848988059 |
| O | 4.886877349  | 3.630381262  | 2.843412205  |
| H | 5.175509375  | 3.585871259  | 3.744516270  |
| H | 5.369837385  | 2.962659213  | 2.366672172  |
| O | 5.857929423  | 1.493643109  | 1.080626076  |
| H | 4.971232357  | 1.422684101  | 0.732376053  |
| H | 6.434678463  | 1.631350116  | 0.341752023  |
| O | 2.041158148  | -2.697054192 | -1.636997120 |
| H | 2.676410194  | -3.215855233 | -2.124023152 |
| H | 2.384884172  | -2.240781164 | -0.894148062 |

Coord\_5

|   |              |              |              |
|---|--------------|--------------|--------------|
| C | 2.064775149  | 2.151818155  | 0.771983054  |
| N | 0.750207056  | 1.999564145  | 0.543723040  |
| C | 0.479654032  | 0.910750067  | -0.185698012 |
| C | 2.694878194  | 0.836483061  | -1.028742073 |
| N | 3.039025221  | 1.471860104  | 0.177450012  |
| N | 1.492930106  | 0.187870015  | -0.697064049 |
| H | 3.447706249  | 0.270583017  | -1.550567113 |
| N | -0.774108055 | 0.498011037  | -0.339836026 |
| H | -0.984907072 | -0.379212026 | -0.793651058 |

|   |              |              |              |
|---|--------------|--------------|--------------|
| H | -1.541610110 | 0.987011070  | 0.090267008  |
| H | 2.368379171  | 2.890201211  | 1.500342106  |
| O | -1.215595088 | 3.836631276  | 1.956761140  |
| H | -0.527280037 | 3.318864236  | 1.543999113  |
| H | -1.037555075 | 4.745661341  | 1.756403124  |
| O | -3.092714222 | 2.078091149  | 0.719170053  |
| H | -3.865147278 | 1.821357134  | 1.203461086  |
| H | -2.677158191 | 2.789784203  | 1.203598084  |
| O | -0.975170068 | -2.479693177 | -1.304798095 |
| H | -0.073308004 | -2.706966196 | -1.490607108 |
| H | -1.364721100 | -3.200836231 | -0.827818059 |
| O | 4.883787351  | 3.628298262  | 2.828439204  |
| H | 5.165961372  | 3.594434257  | 3.732115271  |
| H | 5.375635389  | 2.960067213  | 2.361666171  |
| O | 5.871780421  | 1.475164107  | 1.098632078  |
| H | 4.985339360  | 1.383701100  | 0.755433057  |
| H | 6.446871464  | 1.588019114  | 0.354243025  |
| O | 1.979848143  | -2.717123197 | -1.621224118 |
| H | 2.631857190  | -3.176859231 | -2.145966153 |
| H | 2.308520164  | -2.174830158 | -0.933268067 |

Coord\_6

|   |              |              |              |
|---|--------------|--------------|--------------|
| C | 2.064414150  | 2.162306157  | 0.778322058  |
| N | 0.758331054  | 2.004088144  | 0.547298040  |
| C | 0.509170036  | 0.900811065  | -0.178936011 |
| C | 2.702020193  | 0.877456065  | -1.045556076 |
| N | 3.038717219  | 1.464781104  | 0.194191016  |
| N | 1.530752108  | 0.184467014  | -0.686587049 |
| H | 3.464678249  | 0.337541027  | -1.581673115 |
| N | -0.738525055 | 0.470723034  | -0.318694024 |
| H | -0.948016067 | -0.409169030 | -0.770562054 |
| H | -1.512134107 | 0.961963068  | 0.099033009  |
| H | 2.371252169  | 2.904322210  | 1.501877107  |
| O | -1.227042087 | 3.832981275  | 1.944890139  |
| H | -0.532018037 | 3.320005238  | 1.537329109  |
| H | -1.056697078 | 4.742935343  | 1.742107126  |
| O | -3.072357223 | 2.049071148  | 0.699622050  |
| H | -3.851106279 | 1.791738131  | 1.173485084  |
| H | -2.669988194 | 2.768620198  | 1.183752085  |
| O | -1.000470074 | -2.487514178 | -1.289691095 |
| H | -0.102262006 | -2.730078197 | -1.473969108 |
| H | -1.401095098 | -3.198093230 | -0.805930060 |
| O | 4.877239349  | 3.623507261  | 2.813687202  |
| H | 5.155758369  | 3.600192261  | 3.718889269  |
| H | 5.377711389  | 2.956173214  | 2.354882172  |
| O | 5.880589423  | 1.457211107  | 1.112765080  |
| H | 4.993704361  | 1.344475096  | 0.778256053  |

|   |             |              |              |
|---|-------------|--------------|--------------|
| H | 6.451570462 | 1.546353110  | 0.361996027  |
| O | 1.934562139 | -2.722929198 | -1.598698117 |
| H | 2.594723187 | -3.118347224 | -2.164774155 |
| H | 2.238494160 | -2.097793153 | -0.972467073 |

Coord\_7

|   |              |              |              |
|---|--------------|--------------|--------------|
| C | 2.060624151  | 2.175286155  | 0.784529058  |
| N | 0.762791055  | 2.011958143  | 0.551725042  |
| C | 0.533294036  | 0.893495062  | -0.170590012 |
| C | 2.699558196  | 0.923254065  | -1.060544075 |
| N | 3.032789216  | 1.458912105  | 0.210085014  |
| N | 1.563035111  | 0.184347012  | -0.674070049 |
| H | 3.470075249  | 0.410611028  | -1.613176116 |
| N | -0.706791052 | 0.445882030  | -0.295228019 |
| H | -0.910659064 | -0.437221034 | -0.744695056 |
| H | -1.485576108 | 0.940162066  | 0.110119007  |
| H | 2.371729170  | 2.920860211  | 1.502806109  |
| O | -1.234956091 | 3.831845275  | 1.930225140  |
| H | -0.534807039 | 3.322040242  | 1.527295109  |
| H | -1.070912075 | 4.742126342  | 1.723802122  |
| O | -3.053170219 | 2.024772143  | 0.682337047  |
| H | -3.837977275 | 1.768302130  | 1.146805083  |
| H | -2.662206193 | 2.751856196  | 1.164662085  |
| O | -1.009059071 | -2.491598178 | -1.272540090 |
| H | -0.112390009 | -2.745005197 | -1.452368103 |
| H | -1.417717101 | -3.194619229 | -0.784339057 |
| O | 4.866737350  | 3.616125259  | 2.799108200  |
| H | 5.144833372  | 3.603398260  | 3.704702265  |
| H | 5.375503386  | 2.951144210  | 2.346009171  |
| O | 5.883639426  | 1.439869106  | 1.122554081  |
| H | 4.995639361  | 1.304979095  | 0.800819060  |
| H | 6.447706463  | 1.506436106  | 0.364233029  |
| O | 1.908705136  | -2.714119196 | -1.567750112 |
| H | 2.566598184  | -3.038285219 | -2.179205157 |
| H | 2.174403154  | -2.010172143 | -1.008973074 |

Coord\_8

|   |              |              |              |
|---|--------------|--------------|--------------|
| C | 2.053100150  | 2.191728158  | 0.790702059  |
| N | 0.763219053  | 2.024365148  | 0.557432038  |
| C | 0.551671039  | 0.889829065  | -0.159908014 |
| C | 2.686193195  | 0.973953071  | -1.073287076 |
| N | 3.020461217  | 1.454640105  | 0.225186018  |
| N | 1.588991112  | 0.187886012  | -0.658768048 |
| H | 3.462363247  | 0.489714036  | -1.644554120 |
| N | -0.678888049 | 0.424405033  | -0.269190022 |
| H | -0.871392064 | -0.462209032 | -0.716278052 |
| H | -1.461939105 | 0.922611067  | 0.123589008  |

|   |              |              |              |
|---|--------------|--------------|--------------|
| H | 2.369790169  | 2.940963210  | 1.502892106  |
| O | -1.238851090 | 3.833429277  | 1.913804140  |
| H | -0.535198037 | 3.325016239  | 1.514946107  |
| H | -1.079300080 | 4.743470341  | 1.702908125  |
| O | -3.035132217 | 2.006361146  | 0.667154046  |
| H | -3.826013276 | 1.752339127  | 1.122935083  |
| H | -2.653633194 | 2.740401196  | 1.146551084  |
| O | -0.997316072 | -2.491568179 | -1.254332091 |
| H | -0.099540008 | -2.751003199 | -1.426021104 |
| H | -1.411046102 | -3.190561228 | -0.764531053 |
| O | 4.851604352  | 3.606492259  | 2.784329200  |
| H | 5.133023369  | 3.604690257  | 3.689027268  |
| H | 5.368236385  | 2.945354212  | 2.334427169  |
| O | 5.879972423  | 1.423304101  | 1.127384083  |
| H | 4.990275361  | 1.265181092  | 0.823091062  |
| H | 6.433870462  | 1.468334106  | 0.360016026  |
| O | 1.906516136  | -2.690214195 | -1.525960111 |
| H | 2.548609184  | -2.933581209 | -2.187329155 |
| H | 2.115645154  | -1.912831136 | -1.039315076 |

Coord\_9

|   |              |              |              |
|---|--------------|--------------|--------------|
| C | 2.041352145  | 2.212692160  | 0.796814056  |
| N | 0.759035055  | 2.042644147  | 0.564822041  |
| C | 0.563846042  | 0.890973062  | -0.145934009 |
| C | 2.660391189  | 1.029280076  | -1.083358075 |
| N | 3.000679217  | 1.452292103  | 0.239515016  |
| N | 1.607672117  | 0.195310014  | -0.639656044 |
| H | 3.439761245  | 0.574226039  | -1.675132119 |
| N | -0.654773045 | 0.407343030  | -0.240241015 |
| H | -0.828157061 | -0.482637036 | -0.685510052 |
| H | -1.441189102 | 0.910492066  | 0.139514010  |
| H | 2.365312171  | 2.965943213  | 1.501625107  |
| O | -1.238061091 | 3.837921277  | 1.896886137  |
| H | -0.532591040 | 3.328915239  | 1.501586107  |
| H | -1.080659076 | 4.747188341  | 1.681152119  |
| O | -3.018109215 | 1.995288144  | 0.653815049  |
| H | -3.815400277 | 1.745485123  | 1.101180077  |
| H | -2.643942191 | 2.735374198  | 1.129634081  |
| O | -0.960070069 | -2.486269178 | -1.236297090 |
| H | -0.057981004 | -2.746421196 | -1.394963098 |
| H | -1.375946098 | -3.185475231 | -0.748644051 |
| O | 4.830852349  | 3.595286259  | 2.768460201  |
| H | 5.119987368  | 3.605288259  | 3.670701267  |
| H | 5.354772386  | 2.939478212  | 2.319027169  |
| O | 5.868228424  | 1.407793101  | 1.126403083  |
| H | 4.976436360  | 1.225040087  | 0.845031063  |
| H | 6.408082459  | 1.432080104  | 0.348152025  |

|   |             |              |              |
|---|-------------|--------------|--------------|
| O | 1.933801139 | -2.650196193 | -1.469539106 |
| H | 2.540864183 | -2.798286202 | -2.186017155 |
| H | 2.061164149 | -1.807231128 | -1.059153074 |

Coord\_10

|   |              |              |              |
|---|--------------|--------------|--------------|
| C | 2.031688146  | 2.264279163  | 0.855384061  |
| N | 0.756042055  | 2.101385150  | 0.623201045  |
| C | 0.572282043  | 0.942881069  | -0.096529005 |
| C | 2.625108190  | 1.140427085  | -1.054436078 |
| N | 2.976781213  | 1.482141108  | 0.294716019  |
| N | 1.619009115  | 0.255062016  | -0.594017041 |
| H | 3.404056244  | 0.721336050  | -1.673898120 |
| N | -0.632993046 | 0.446297032  | -0.185591013 |
| H | -0.778891056 | -0.438519031 | -0.643937046 |
| H | -1.420302100 | 0.952789066  | 0.187484012  |
| H | 2.367134170  | 3.010282218  | 1.562671111  |
| O | -1.219495088 | 3.865492280  | 1.955738140  |
| H | -0.515543040 | 3.357187242  | 1.556284111  |
| H | -1.057741076 | 4.776184343  | 1.749504124  |
| O | -2.995314217 | 2.039110148  | 0.686934052  |
| H | -3.800974275 | 1.791770130  | 1.121160080  |
| H | -2.623802191 | 2.775198199  | 1.170816083  |
| O | -0.896030065 | -2.405912173 | -1.241652088 |
| H | 0.013506000  | -2.661313191 | -1.383723098 |
| H | -1.313764093 | -3.116905226 | -0.773223054 |
| O | 4.812966348  | 3.568537259  | 2.825701203  |
| H | 5.114213367  | 3.577260259  | 3.724006270  |
| H | 5.341484385  | 2.924589212  | 2.364425169  |
| O | 5.850140421  | 1.400177103  | 1.161846084  |
| H | 4.955701359  | 1.198042088  | 0.906002066  |
| H | 6.372034460  | 1.414289101  | 0.371180025  |
| O | 1.992265145  | -2.531771182 | -1.412996104 |
| H | 2.532767184  | -2.547615183 | -2.190398156 |
| H | 2.003736146  | -1.641610116 | -1.070561077 |

LIIC path connecting S<sub>2</sub>/S<sub>1</sub> and T1-MIN

Coord\_1

|   |              |              |              |
|---|--------------|--------------|--------------|
| C | 2.060445146  | 2.282308163  | 0.775020055  |
| N | 0.748986053  | 1.894929139  | 0.530101039  |
| C | 0.484232034  | 0.790414060  | -0.192116012 |
| C | 2.733902196  | 0.476579036  | -0.460365035 |
| N | 3.059404218  | 1.543423109  | 0.279551021  |
| N | 1.459598104  | 0.044074004  | -0.720645050 |
| H | 3.538865254  | -0.102917006 | -0.878035064 |
| N | -0.779972054 | 0.433360029  | -0.386366026 |
| H | -0.964289067 | -0.450938033 | -0.826183060 |
| H | -1.534823111 | 0.969351071  | 0.004144003  |

|   |              |              |              |
|---|--------------|--------------|--------------|
| H | 2.262306163  | 3.121963224  | 1.411395100  |
| O | -1.224910090 | 3.930384281  | 2.028615145  |
| H | -0.507626035 | 3.414655246  | 1.683714120  |
| H | -1.007725073 | 4.841864347  | 1.881828134  |
| O | -3.031892219 | 2.117598151  | 0.691950049  |
| H | -3.844069275 | 1.865938137  | 1.111465082  |
| H | -2.666964190 | 2.844367206  | 1.190400086  |
| O | -1.072698075 | -2.573787184 | -1.307675094 |
| H | -0.172309013 | -2.824868204 | -1.497719107 |
| H | -1.433421103 | -3.250974235 | -0.750194054 |
| O | 4.835406347  | 3.711157270  | 2.904373207  |
| H | 5.119665369  | 3.611883258  | 3.802531274  |
| H | 5.365238384  | 3.115043226  | 2.384304173  |
| O | 5.902844427  | 1.719795124  | 1.041696078  |
| H | 5.003443360  | 1.669064118  | 0.729622050  |
| H | 6.456185465  | 1.827653131  | 0.280503022  |
| O | 1.866502134  | -2.603386189 | -1.765776128 |
| H | 2.184240157  | -2.562330184 | -2.657024193 |
| H | 1.700955122  | -1.706777125 | -1.486005107 |

Coord\_2

|   |              |              |              |
|---|--------------|--------------|--------------|
| C | 2.075047152  | 2.260366162  | 0.798691058  |
| N | 0.754320054  | 1.900569136  | 0.535193037  |
| C | 0.488375037  | 0.778709056  | -0.177638013 |
| C | 2.734658194  | 0.504473038  | -0.511577036 |
| N | 3.066689221  | 1.546276110  | 0.268632020  |
| N | 1.456181106  | 0.057709002  | -0.736695054 |
| H | 3.537659253  | -0.061135006 | -0.951274069 |
| N | -0.777140056 | 0.394370027  | -0.319988021 |
| H | -0.955692069 | -0.486235034 | -0.769497053 |
| H | -1.525763109 | 0.951291066  | 0.052021002  |
| H | 2.283971166  | 3.075510220  | 1.464561104  |
| O | -1.221707086 | 3.946171284  | 2.008192147  |
| H | -0.506218037 | 3.441932248  | 1.642881121  |
| H | -1.012923075 | 4.861892351  | 1.876585135  |
| O | -3.039020220 | 2.127261155  | 0.692968048  |
| H | -3.853946278 | 1.882196134  | 1.111096081  |
| H | -2.673642195 | 2.856688204  | 1.186982083  |
| O | -1.076965080 | -2.580389183 | -1.297886093 |
| H | -0.176474014 | -2.824666201 | -1.496050108 |
| H | -1.434133105 | -3.270718235 | -0.754366056 |
| O | 4.816581348  | 3.708936265  | 2.905982208  |
| H | 5.104756366  | 3.623080262  | 3.804289274  |
| H | 5.353948388  | 3.115639223  | 2.390337174  |
| O | 5.904167423  | 1.718979122  | 1.057081075  |
| H | 5.010165361  | 1.667033120  | 0.729989050  |
| H | 6.471582464  | 1.817991132  | 0.305102022  |

|   |             |              |              |
|---|-------------|--------------|--------------|
| O | 1.856517136 | -2.595557186 | -1.777597128 |
| H | 2.167048157 | -2.558162183 | -2.671517194 |
| H | 1.694724124 | -1.697794124 | -1.499601110 |

Coord\_3

|   |              |              |              |
|---|--------------|--------------|--------------|
| C | 2.090432149  | 2.237800160  | 0.820101057  |
| N | 0.761066053  | 1.906969138  | 0.538563038  |
| C | 0.493701037  | 0.767668053  | -0.163857010 |
| C | 2.733746195  | 0.534728038  | -0.563001042 |
| N | 3.074235220  | 1.549436113  | 0.256669016  |
| N | 1.452743105  | 0.072043006  | -0.753118054 |
| H | 3.533741257  | -0.017088001 | -1.024947073 |
| N | -0.770976056 | 0.357334028  | -0.252264018 |
| H | -0.946457069 | -0.519509038 | -0.710269049 |
| H | -1.514606111 | 0.933138069  | 0.099835008  |
| H | 2.305949167  | 3.026969219  | 1.515138109  |
| O | -1.219773086 | 3.959787284  | 1.988590141  |
| H | -0.505938039 | 3.467276250  | 1.604252113  |
| H | -1.018480072 | 4.879336351  | 1.873198136  |
| O | -3.044524219 | 2.135432155  | 0.690309049  |
| H | -3.863083280 | 1.896748138  | 1.105055078  |
| H | -2.679775195 | 2.867271209  | 1.181002084  |
| O | -1.079856076 | -2.588141185 | -1.287779093 |
| H | -0.179223015 | -2.825213201 | -1.493784108 |
| H | -1.433262101 | -3.291163236 | -0.758226054 |
| O | 4.796666345  | 3.705896269  | 2.906094208  |
| H | 5.087883364  | 3.633836261  | 3.804648274  |
| H | 5.341744386  | 3.115192227  | 2.395478174  |
| O | 5.905140426  | 1.716616123  | 1.072527077  |
| H | 5.016996362  | 1.663458120  | 0.730007053  |
| H | 6.486922466  | 1.806044131  | 0.330393022  |
| O | 1.847724131  | -2.587402184 | -1.788478129 |
| H | 2.151162155  | -2.553897184 | -2.684966191 |
| H | 1.689260120  | -1.688408123 | -1.512700110 |

Coord\_4

|   |              |              |              |
|---|--------------|--------------|--------------|
| C | 2.106267154  | 2.214772160  | 0.839407062  |
| N | 0.768961055  | 1.914413138  | 0.540146040  |
| C | 0.500016037  | 0.757526053  | -0.150717010 |
| C | 2.730892199  | 0.567648043  | -0.614501042 |
| N | 3.081757220  | 1.553087113  | 0.243811020  |
| N | 1.449082103  | 0.087340006  | -0.769879056 |
| H | 3.526837256  | 0.029614002  | -1.098967079 |
| N | -0.761458057 | 0.322398022  | -0.183079014 |
| H | -0.936488068 | -0.550703042 | -0.648368048 |
| H | -1.501556108 | 0.914896065  | 0.147589011  |
| H | 2.327751170  | 2.976361215  | 1.563379113  |



|   |              |              |              |
|---|--------------|--------------|--------------|
| O | -1.218752086 | 3.971867284  | 1.968898143  |
| H | -0.506338038 | 3.491243249  | 1.566998114  |
| H | -1.024171071 | 4.894793354  | 1.870391137  |
| O | -3.048252220 | 2.142278153  | 0.683779049  |
| H | -3.871247278 | 1.909857139  | 1.093302078  |
| H | -2.685154192 | 2.876447206  | 1.172000085  |
| O | -1.081415079 | -2.596819189 | -1.277419094 |
| H | -0.180594013 | -2.826247203 | -1.491003107 |
| H | -1.430803104 | -3.312136240 | -0.761847055 |
| O | 4.775820344  | 3.701737269  | 2.904956207  |
| H | 5.069273364  | 3.643716264  | 3.803815275  |
| H | 5.328662383  | 3.113384224  | 2.399881172  |
| O | 5.905493425  | 1.712448122  | 1.088033076  |
| H | 5.023657360  | 1.658196119  | 0.729754053  |
| H | 6.501849466  | 1.791529127  | 0.356369026  |
| O | 1.840071133  | -2.578587186 | -1.798498132 |
| H | 2.136540152  | -2.549160185 | -2.697442196 |
| H | 1.684466123  | -1.678307119 | -1.525340111 |

Coord\_5

|   |              |              |              |
|---|--------------|--------------|--------------|
| C | 2.122205153  | 2.191404159  | 0.856801060  |
| N | 0.777749054  | 1.923153141  | 0.539933041  |
| C | 0.507128036  | 0.748497056  | -0.138099011 |
| C | 2.725799196  | 0.603561044  | -0.665887048 |
| N | 3.088959222  | 1.557408110  | 0.230238015  |
| N | 1.444988102  | 0.103852009  | -0.786890057 |
| H | 3.516640254  | 0.079395008  | -1.173202085 |
| N | -0.748544053 | 0.289761020  | -0.112290010 |
| H | -0.925750067 | -0.579651043 | -0.583649040 |
| H | -1.486826104 | 0.896567063  | 0.195283016  |
| H | 2.348847170  | 2.923660210  | 1.609546113  |
| O | -1.218293088 | 3.982911287  | 1.948246138  |
| H | -0.507001034 | 3.514236254  | 1.530295110  |
| H | -1.029768073 | 4.908743355  | 1.866953136  |
| O | -3.050047221 | 2.147900153  | 0.673207051  |
| H | -3.878191280 | 1.921715139  | 1.075811076  |
| H | -2.689561196 | 2.884459209  | 1.159551085  |
| O | -1.081705079 | -2.606195189 | -1.266820092 |
| H | -0.180655011 | -2.827499205 | -1.487750106 |
| H | -1.426770101 | -3.333459241 | -0.765258053 |
| O | 4.754215344  | 3.696194264  | 2.902799206  |
| H | 5.049197364  | 3.652322263  | 3.801974272  |
| H | 5.314748382  | 3.109932226  | 2.403674172  |
| O | 5.904960427  | 1.706252123  | 1.103551077  |
| H | 5.029856364  | 1.651129121  | 0.729287054  |
| H | 6.515984468  | 1.774191126  | 0.382958029  |
| O | 1.833467133  | -2.568778182 | -1.807717130 |

|   |             |              |              |
|---|-------------|--------------|--------------|
| H | 2.123094155 | -2.543565183 | -2.709007195 |
| H | 1.680211120 | -1.667179120 | -1.537530112 |

Coord\_6

|   |              |              |              |
|---|--------------|--------------|--------------|
| C | 2.137895152  | 2.167780157  | 0.872513063  |
| N | 0.787193058  | 1.933401140  | 0.537988040  |
| C | 0.514856035  | 0.740775053  | -0.125816008 |
| C | 2.718149198  | 0.642811046  | -0.716916049 |
| N | 3.095544225  | 1.562566112  | 0.216160016  |
| N | 1.440245102  | 0.121822011  | -0.804005056 |
| H | 3.502804253  | 0.132714008  | -1.247477092 |
| N | -0.732176055 | 0.259686020  | -0.039735004 |
| H | -0.914291067 | -0.606070042 | -0.515959036 |
| H | -1.470632106 | 0.878154066  | 0.242921018  |
| H | 2.368683173  | 2.868787207  | 1.653914117  |
| O | -1.218049090 | 3.993301286  | 1.925801138  |
| H | -0.507533037 | 3.536527253  | 1.493334106  |
| H | -1.035032074 | 4.921565352  | 1.861741131  |
| O | -3.049753221 | 2.152343157  | 0.658444048  |
| H | -3.883662279 | 1.932441138  | 1.052564076  |
| H | -2.692775196 | 2.891474210  | 1.143258082  |
| O | -1.080808076 | -2.616043188 | -1.255948092 |
| H | -0.179495013 | -2.828703205 | -1.484037107 |
| H | -1.421189102 | -3.354958242 | -0.768448055 |
| O | 4.732037340  | 3.689032263  | 2.899845207  |
| H | 5.027973361  | 3.659292263  | 3.799301276  |
| H | 5.300064380  | 3.104590224  | 2.406958171  |
| O | 5.903288422  | 1.697844121  | 1.118985082  |
| H | 5.035299365  | 1.642162117  | 0.728633055  |
| H | 6.528938468  | 1.753817125  | 0.410012031  |
| O | 1.827790130  | -2.557639186 | -1.816186130 |
| H | 2.110691150  | -2.536713184 | -2.719714197 |
| H | 1.676343120  | -1.654712122 | -1.549253113 |

Coord\_7

|   |              |              |              |
|---|--------------|--------------|--------------|
| C | 2.152993156  | 2.143938155  | 0.886815062  |
| N | 0.797079058  | 1.945328139  | 0.534454040  |
| C | 0.523038036  | 0.734533053  | -0.113605010 |
| C | 2.707600198  | 0.685770047  | -0.767279055 |
| N | 3.101213221  | 1.568721115  | 0.201821017  |
| N | 1.434642105  | 0.141481009  | -0.821018057 |
| H | 3.484939250  | 0.190078012  | -1.321573093 |
| N | -0.712294051 | 0.232505015  | 0.034759002  |
| H | -0.902271065 | -0.629548044 | -0.445133033 |
| H | -1.453195107 | 0.859657061  | 0.290501021  |
| H | 2.386691170  | 2.811603202  | 1.696772124  |
| O | -1.217669087 | 4.003316288  | 1.900756137  |

|   |              |              |              |
|---|--------------|--------------|--------------|
| H | -0.507564036 | 3.558273258  | 1.455313107  |
| H | -1.039704074 | 4.933556355  | 1.853660134  |
| O | -3.047210217 | 2.155593157  | 0.639351047  |
| H | -3.887403282 | 1.942093141  | 1.023541075  |
| H | -2.694571192 | 2.897592208  | 1.122745082  |
| O | -1.078821079 | -2.626137191 | -1.244723089 |
| H | -0.177227012 | -2.829585206 | -1.479844108 |
| H | -1.414094099 | -3.376463243 | -0.771377056 |
| O | 4.709486340  | 3.680029265  | 2.896324209  |
| H | 5.005963360  | 3.664280262  | 3.795974275  |
| H | 5.284692379  | 3.097140223  | 2.409818173  |
| O | 5.900247426  | 1.687083122  | 1.134185079  |
| H | 5.039697362  | 1.631234120  | 0.727793055  |
| H | 6.540321472  | 1.730250126  | 0.437301029  |
| O | 1.822885133  | -2.544827181 | -1.823950134 |
| H | 2.099150149  | -2.528183180 | -2.729617199 |
| H | 1.672689120  | -1.640593117 | -1.560466114 |

Coord\_8

|   |              |              |              |
|---|--------------|--------------|--------------|
| C | 2.167168158  | 2.119870153  | 0.900026067  |
| N | 0.807225058  | 1.959069141  | 0.529559040  |
| C | 0.531537041  | 0.729922051  | -0.101127005 |
| C | 2.693781194  | 0.732843052  | -0.816590061 |
| N | 3.105675222  | 1.576029111  | 0.187500014  |
| N | 1.427975101  | 0.163056010  | -0.837653062 |
| H | 3.462599250  | 0.252053019  | -1.395212103 |
| N | -0.688851049 | 0.208631014  | 0.111364008  |
| H | -0.889989062 | -0.649532047 | -0.370989029 |
| H | -1.434739103 | 0.841073060  | 0.338023022  |
| H | 2.402297173  | 2.751903197  | 1.738427126  |
| O | -1.216802089 | 4.013153291  | 1.872302133  |
| H | -0.506735038 | 3.579528260  | 1.415422101  |
| H | -1.043502075 | 4.944941355  | 1.841623130  |
| O | -3.042258219 | 2.157589156  | 0.615779043  |
| H | -3.889162278 | 1.950682142  | 0.988696071  |
| H | -2.694717192 | 2.902853209  | 1.097622080  |
| O | -1.075855078 | -2.636243191 | -1.233030087 |
| H | -0.173987013 | -2.829863204 | -1.475131107 |
| H | -1.405534102 | -3.397797246 | -0.773983058 |
| O | 4.686780339  | 3.668971265  | 2.892482208  |
| H | 4.983571357  | 3.666942261  | 3.792182271  |
| H | 5.268737378  | 3.087385222  | 2.412328172  |
| O | 5.895638424  | 1.673878123  | 1.148948082  |
| H | 5.042769363  | 1.618316115  | 0.726728054  |
| H | 6.549751469  | 1.703396122  | 0.464508032  |
| O | 1.818563131  | -2.529990183 | -1.831053132 |
| H | 2.088242149  | -2.517526180 | -2.738773198 |

H 1.669054122 -1.624501117 -1.571103111

Coord\_9

C 2.180111156 2.095525152 0.912510068  
N 0.817492059 1.974724141 0.523621036  
C 0.540246039 0.727086053 -0.087962007  
C 2.676284192 0.784482057 -0.864375063  
N 3.108642224 1.584650112 0.173517014  
N 1.420050101 0.186779016 -0.853560061  
H 3.435267245 0.319282025 -1.468041106  
N -0.661839048 0.188566015 0.190244015  
H -0.877914063 -0.665304048 -0.293312022  
H -1.415500102 0.822399062 0.385483030  
H 2.414935175 2.689417191 1.779198127  
O -1.215087089 4.022935291 1.839597133  
H -0.504689037 3.600246259 1.372828101  
H -1.046104076 4.955882359 1.824511131  
O -3.034736218 2.158223158 0.587540044  
H -3.888691278 1.958175139 0.947923070  
H -2.692976194 2.907251212 1.067461078  
O -1.072042075 -2.646105192 -1.220718090  
H -0.169941014 -2.829229202 -1.469839107  
H -1.395581098 -3.418760248 -0.776190056  
O 4.664158335 3.655630262 2.888594210  
H 4.961255355 3.666916263 3.788144272  
H 5.252331380 3.075140219 2.414559173  
O 5.889299426 1.658180122 1.163010084  
H 5.044248361 1.603421114 0.725363052  
H 6.556869475 1.673228118 0.491216036  
O 1.814594132 -2.512756182 -1.837533130  
H 2.077681147 -2.504256182 -2.747241199  
H 1.665217121 -1.606099116 -1.581073112

Coord\_10

C 2.407829171 2.029857145 0.980960071  
N 1.038863074 1.949059140 0.591667044  
C 0.752902055 0.679947049 0.010798999  
C 2.847250206 0.791590055 -0.853764064  
N 3.316175238 1.550415112 0.206815016  
N 1.604170117 0.163116014 -0.792671059  
H 3.586759261 0.340098027 -1.490943109  
N -0.422672030 0.127998007 0.374079027  
H -0.664090047 -0.723259054 -0.102092008  
H -1.185118088 0.759254055 0.542419037  
H 2.651867191 2.587215189 1.869896134  
O -0.984758071 3.994929289 1.893237137  
H -0.279822018 3.580436259 1.410837103

|   |              |              |              |
|---|--------------|--------------|--------------|
| H | -0.820116059 | 4.928731354  | 1.885988133  |
| O | -2.812620201 | 2.113047153  | 0.678807048  |
| H | -3.669201266 | 1.921617140  | 1.037650073  |
| H | -2.471278179 | 2.868816206  | 1.148115083  |
| O | -0.877262063 | -2.707545195 | -1.085605078 |
| H | 0.021603000  | -2.880417205 | -1.352890099 |
| H | -1.188104087 | -3.489250251 | -0.648025046 |
| O | 4.883151354  | 3.608940260  | 2.901336211  |
| H | 5.192565372  | 3.637391263  | 3.796362273  |
| H | 5.470909392  | 3.027340220  | 2.427970175  |
| O | 6.100546439  | 1.601362117  | 1.185884088  |
| H | 5.257464378  | 1.545553111  | 0.744722054  |
| H | 6.772052487  | 1.598207115  | 0.517874039  |
| O | 1.992320142  | -2.547043185 | -1.759953126 |
| H | 2.236736159  | -2.546465185 | -2.674907193 |
| H | 1.845557134  | -1.638177116 | -1.509195109 |
